# Supplementary material for: RNA-Seq based transcriptome analysis during bovine viral diarrhoea virus (BVDV) infection
Source: BMC Genomics. 2019 Oct 24;20:774. doi: 10.1186/s12864-019-6120-4 (PMC6813989; doi:10.1186/s12864-019-6120-4)
Supplement: Supplementary file 4 — Additional file 4. DEGs identified in comparison group Mock vs. MBV6h. [file 12864_2019_6120_MOESM4_ESM.xls]

## Sheet: GO富集分析统计表
Number	GO ID	Term Type	Description	Ratio_in_study	Ratio_in_pop	Pvalue_uncorrected	Pvalue_corrected
63	GO:0044283	BP	small molecule biosynthetic process	63/1709	288/18253	1.27704e-10	2.41667e-06
2	GO:0007608	BP	sensory perception of smell	2/1709	983/18253	2.01699e-10	3.81695e-06
3	GO:0007606	BP	sensory perception of chemical stimulus	3/1709	1043/18253	2.20214e-10	4.16733e-06
51	GO:0050877	BP	neurological system process	51/1709	1499/18253	2.45146e-10	4.63914e-06
3	GO:0050907	BP	detection of chemical stimulus involved in sensory perception	3/1709	994/18253	2.51883e-10	4.76663e-06
194	GO:0044281	BP	small molecule metabolic process	194/1709	1189/18253	2.52616e-10	4.7805e-06
6	GO:0009593	BP	detection of chemical stimulus	6/1709	1012/18253	2.5334e-10	4.79421e-06
3	GO:0050906	BP	detection of stimulus involved in sensory perception	3/1709	1037/18253	2.80265e-10	5.30374e-06
25	GO:0007600	BP	sensory perception	25/1709	1268/18253	3.19712e-10	6.05024e-06
2	GO:0050911	BP	detection of chemical stimulus involved in sensory perception of smell	2/1709	971/18253	3.33709e-10	6.31511e-06
9	GO:0051606	BP	detection of stimulus	9/1709	1105/18253	3.3634e-10	6.36489e-06
44	GO:0007186	BP	G-protein coupled receptor signaling pathway	44/1709	1599/18253	3.39911e-10	6.43247e-06
84	GO:0003008	BP	system process	84/1709	1791/18253	3.73211e-10	7.06264e-06
233	GO:0051716	BP	cellular response to stimulus	233/1709	1635/18253	3.90165e-10	7.38349e-06
103	GO:0019752	BP	carboxylic acid metabolic process	103/1709	579/18253	3.97278e-10	7.51809e-06
54	GO:0006520	BP	cellular amino acid metabolic process	54/1709	235/18253	4.46184e-10	8.44358e-06
274	GO:0051239	BP	regulation of multicellular organismal process	274/1709	1981/18253	4.52998e-10	8.57254e-06
1034	GO:0044699	BP	single-organism process	1034/1709	9073/18253	5.32856e-10	1.00838e-05
109	GO:0043436	BP	oxoacid metabolic process	109/1709	630/18253	5.35625e-10	1.01362e-05
242	GO:0050793	BP	regulation of developmental process	242/1709	1763/18253	6.42607e-10	1.21607e-05
855	GO:0044763	BP	single-organism cellular process	855/1709	7520/18253	6.47348e-10	1.22504e-05
296	GO:0023051	BP	regulation of signaling	296/1709	2246/18253	6.7231e-10	1.27228e-05
300	GO:0010646	BP	regulation of cell communication	300/1709	2296/18253	7.62845e-10	1.44361e-05
1127	GO:0009987	BP	cellular process	1127/1709	10705/18253	7.79072e-10	1.47432e-05
133	GO:0044711	BP	single-organism biosynthetic process	133/1709	834/18253	8.00265e-10	1.51442e-05
109	GO:0006082	BP	organic acid metabolic process	109/1709	644/18253	8.49516e-10	1.60762e-05
403	GO:0044767	BP	single-organism developmental process	403/1709	3296/18253	1.67704e-09	3.17362e-05
422	GO:0032502	BP	developmental process	422/1709	3486/18253	2.05481e-09	3.88852e-05
267	GO:0009966	BP	regulation of signal transduction	267/1709	2026/18253	2.40095e-09	4.54357e-05
388	GO:0044710	BP	single-organism metabolic process	388/1709	3163/18253	2.57702e-09	4.87676e-05
42	GO:1901605	BP	alpha-amino acid metabolic process	42/1709	170/18253	3.33836e-09	6.31751e-05
334	GO:0048583	BP	regulation of response to stimulus	334/1709	2661/18253	3.9825e-09	7.53648e-05
484	GO:0048518	BP	positive regulation of biological process	484/1709	4112/18253	4.91032e-09	9.29229e-05
408	GO:0048523	BP	negative regulation of cellular process	408/1709	3377/18253	5.35019e-09	0.000101247
426	GO:0048519	BP	negative regulation of biological process	426/1709	3569/18253	1.1041e-08	0.00020894
275	GO:0048869	BP	cellular developmental process	275/1709	2134/18253	1.12825e-08	0.000213509
452	GO:0048522	BP	positive regulation of cellular process	452/1709	3829/18253	1.27576e-08	0.000241425
157	GO:0051240	BP	positive regulation of multicellular organismal process	157/1709	1080/18253	1.73896e-08	0.000329081
134	GO:0070887	BP	cellular response to chemical stimulus	134/1709	886/18253	2.13648e-08	0.000404308
187	GO:0030154	BP	cell differentiation	187/1709	1355/18253	3.72792e-08	0.000705472
126	GO:0009968	BP	negative regulation of signal transduction	126/1709	830/18253	4.4854e-08	0.000848817
179	GO:2000026	BP	regulation of multicellular organismal development	179/1709	1294/18253	5.92067e-08	0.00112043
234	GO:0006950	BP	response to stress	234/1709	1790/18253	6.5916e-08	0.00124739
131	GO:0048513	BP	animal organ development	131/1709	883/18253	8.20638e-08	0.00155298
92	GO:0048646	BP	anatomical structure formation involved in morphogenesis	92/1709	560/18253	8.25166e-08	0.00156154
194	GO:0042221	BP	response to chemical	194/1709	1433/18253	8.28682e-08	0.0015682
111	GO:0071310	BP	cellular response to organic substance	111/1709	719/18253	1.36457e-07	0.0025823
159	GO:0010033	BP	response to organic substance	159/1709	1138/18253	1.75554e-07	0.00332219
39	GO:0016053	BP	organic acid biosynthetic process	39/1709	172/18253	1.86302e-07	0.00352557
39	GO:0046394	BP	carboxylic acid biosynthetic process	39/1709	172/18253	1.86302e-07	0.00352557
774	GO:0008152	BP	metabolic process	774/1709	7197/18253	2.5665e-07	0.00485685
150	GO:0048585	BP	negative regulation of response to stimulus	150/1709	1065/18253	3.01064e-07	0.00569734
129	GO:0023057	BP	negative regulation of signaling	129/1709	885/18253	3.08065e-07	0.00582983
131	GO:0010648	BP	negative regulation of cell communication	131/1709	905/18253	4.08409e-07	0.00772873
302	GO:0009893	BP	positive regulation of metabolic process	302/1709	2484/18253	6.50802e-07	0.0123158
221	GO:0044707	BP	single-multicellular organism process	221/1709	1722/18253	6.68013e-07	0.0126415
92	GO:0009719	BP	response to endogenous stimulus	92/1709	584/18253	7.20897e-07	0.0136423
152	GO:0042127	BP	regulation of cell proliferation	152/1709	1103/18253	8.38101e-07	0.0158602
714	GO:0071704	BP	organic substance metabolic process	714/1709	6627/18253	9.98574e-07	0.018897
109	GO:0022603	BP	regulation of anatomical structure morphogenesis	109/1709	740/18253	1.61521e-06	0.0305662
159	GO:0009653	BP	anatomical structure morphogenesis	159/1709	1177/18253	1.75819e-06	0.033272
20	GO:0042476	BP	odontogenesis	20/1709	67/18253	1.86704e-06	0.0353318
69	GO:0071495	BP	cellular response to endogenous stimulus	69/1709	413/18253	1.99756e-06	0.0378018
158	GO:0045595	BP	regulation of cell differentiation	158/1709	1175/18253	2.26357e-06	0.0428358
655	GO:0044237	BP	cellular metabolic process	655/1709	6049/18253	2.27446e-06	0.043042
138	GO:0051253	BP	negative regulation of RNA metabolic process	138/1709	998/18253	2.41517e-06	0.0457046
192	GO:0010628	BP	positive regulation of gene expression	192/1709	1486/18253	2.52843e-06	0.047848
21	GO:0060759	BP	regulation of response to cytokine stimulus	21/1709	74/18253	2.58177e-06	0.0488575
102	GO:1901700	BP	response to oxygen-containing compound	102/1709	688/18253	2.61927e-06	0.049567
19	GO:1901607	BP	alpha-amino acid biosynthetic process	19/1709	63/18253	2.83342e-06	0.0536197
684	GO:0044238	BP	primary metabolic process	684/1709	6359/18253	3.00621e-06	0.0568895
20	GO:0001959	BP	regulation of cytokine-mediated signaling pathway	20/1709	69/18253	3.10257e-06	0.0587129
281	GO:0010604	BP	positive regulation of macromolecule metabolic process	281/1709	2329/18253	3.27729e-06	0.0620194
65	GO:0010942	BP	positive regulation of cell death	65/1709	386/18253	3.30256e-06	0.0624976
130	GO:0033554	BP	cellular response to stress	130/1709	932/18253	3.46226e-06	0.0655198
19	GO:0008652	BP	cellular amino acid biosynthetic process	19/1709	64/18253	3.67873e-06	0.0696163
244	GO:0009892	BP	negative regulation of metabolic process	244/1709	1980/18253	3.73138e-06	0.0706126
262	GO:0048856	BP	anatomical structure development	262/1709	2152/18253	3.88679e-06	0.0735537
133	GO:1902679	BP	negative regulation of RNA biosynthetic process	133/1709	964/18253	3.90399e-06	0.0738791
238	GO:0032879	BP	regulation of localization	238/1709	1923/18253	4.12858e-06	0.0781292
32	GO:0030278	BP	regulation of ossification	32/1709	146/18253	4.55787e-06	0.0862532
64	GO:0009887	BP	organ morphogenesis	64/1709	385/18253	5.26279e-06	0.099593
139	GO:0043067	BP	regulation of programmed cell death	139/1709	1022/18253	5.39355e-06	0.102067
16	GO:0009064	BP	glutamine family amino acid metabolic process	16/1709	49/18253	5.44816e-06	0.103101
146	GO:0010941	BP	regulation of cell death	146/1709	1084/18253	5.7795e-06	0.109371
131	GO:1903507	BP	negative regulation of nucleic acid-templated transcription	131/1709	954/18253	6.03791e-06	0.114261
19	GO:0016125	BP	sterol metabolic process	19/1709	66/18253	6.08381e-06	0.11513
19	GO:0007050	BP	cell cycle arrest	19/1709	66/18253	6.08381e-06	0.11513
153	GO:0010629	BP	negative regulation of gene expression	153/1709	1151/18253	6.47904e-06	0.122609
56	GO:0032787	BP	monocarboxylic acid metabolic process	56/1709	323/18253	6.84361e-06	0.129508
137	GO:0042981	BP	regulation of apoptotic process	137/1709	1009/18253	7.91803e-06	0.149841
152	GO:0010647	BP	positive regulation of cell communication	152/1709	1148/18253	8.22109e-06	0.155576
13	GO:0009069	BP	serine family amino acid metabolic process	13/1709	35/18253	8.34067e-06	0.157839
126	GO:0051094	BP	positive regulation of developmental process	126/1709	915/18253	8.7946e-06	0.166429
181	GO:0048584	BP	positive regulation of response to stimulus	181/1709	1413/18253	9.24661e-06	0.174983
232	GO:0031324	BP	negative regulation of cellular metabolic process	232/1709	1890/18253	9.44324e-06	0.178704
53	GO:0008610	BP	lipid biosynthetic process	53/1709	307/18253	1.1081e-05	0.209697
67	GO:1901701	BP	cellular response to oxygen-containing compound	67/1709	416/18253	1.14288e-05	0.216279
278	GO:0031325	BP	positive regulation of cellular metabolic process	278/1709	2337/18253	1.1962e-05	0.226369
61	GO:0043068	BP	positive regulation of programmed cell death	61/1709	371/18253	1.27743e-05	0.241741
29	GO:0008202	BP	steroid metabolic process	29/1709	132/18253	1.2836e-05	0.242909
28	GO:0001666	BP	response to hypoxia	28/1709	127/18253	1.75986e-05	0.333036
60	GO:0043065	BP	positive regulation of apoptotic process	60/1709	368/18253	1.86313e-05	0.352578
89	GO:0000122	BP	negative regulation of transcription from RNA polymerase II promoter	89/1709	607/18253	1.89257e-05	0.35815
127	GO:0045892	BP	negative regulation of transcription, DNA-templated	127/1709	938/18253	1.9038e-05	0.360276
28	GO:0036293	BP	response to decreased oxygen levels	28/1709	128/18253	1.9597e-05	0.370853
55	GO:0010243	BP	response to organonitrogen compound	55/1709	327/18253	1.96629e-05	0.3721
226	GO:0010605	BP	negative regulation of macromolecule metabolic process	226/1709	1854/18253	2.07817e-05	0.393273
161	GO:1902531	BP	regulation of intracellular signal transduction	161/1709	1251/18253	2.29316e-05	0.433958
17	GO:0043467	BP	regulation of generation of precursor metabolites and energy	17/1709	60/18253	2.33719e-05	0.44229
13	GO:0003341	BP	cilium movement	13/1709	38/18253	2.34086e-05	0.442984
18	GO:1901606	BP	alpha-amino acid catabolic process	18/1709	66/18253	2.40357e-05	0.454851
32	GO:0071496	BP	cellular response to external stimulus	32/1709	158/18253	2.52497e-05	0.477826
130	GO:0035556	BP	intracellular signal transduction	130/1709	973/18253	2.68927e-05	0.508917
66	GO:0007167	BP	enzyme linked receptor protein signaling pathway	66/1709	419/18253	2.71014e-05	0.512868
147	GO:0023056	BP	positive regulation of signaling	147/1709	1128/18253	2.91286e-05	0.55123
39	GO:0071417	BP	cellular response to organonitrogen compound	39/1709	209/18253	3.41769e-05	0.646764
160	GO:1902680	BP	positive regulation of RNA biosynthetic process	160/1709	1250/18253	3.52259e-05	0.666615
28	GO:0070482	BP	response to oxygen levels	28/1709	133/18253	3.62715e-05	0.686402
19	GO:0009063	BP	cellular amino acid catabolic process	19/1709	74/18253	3.63816e-05	0.688486
26	GO:0097193	BP	intrinsic apoptotic signaling pathway	26/1709	118/18253	3.70898e-05	0.701887
21	GO:0010565	BP	regulation of cellular ketone metabolic process	21/1709	87/18253	3.94004e-05	0.745612
159	GO:0045893	BP	positive regulation of transcription, DNA-templated	159/1709	1245/18253	4.24407e-05	0.803148
159	GO:1903508	BP	positive regulation of nucleic acid-templated transcription	159/1709	1245/18253	4.24407e-05	0.803148
108	GO:0006629	BP	lipid metabolic process	108/1709	785/18253	4.3312e-05	0.819637
10	GO:0016126	BP	sterol biosynthetic process	10/1709	25/18253	4.41577e-05	0.835641
190	GO:0006357	BP	regulation of transcription from RNA polymerase II promoter	190/1709	1537/18253	4.53655e-05	0.858497
143	GO:0010558	BP	negative regulation of macromolecule biosynthetic process	143/1709	1102/18253	4.78868e-05	0.90621
121	GO:0045944	BP	positive regulation of transcription from RNA polymerase II promoter	121/1709	903/18253	4.94314e-05	0.935439
41	GO:1901699	BP	cellular response to nitrogen compound	41/1709	230/18253	5.28206e-05	0.999576
163	GO:0051254	BP	positive regulation of RNA metabolic process	163/1709	1290/18253	5.70051e-05	1
167	GO:0007166	BP	cell surface receptor signaling pathway	167/1709	1329/18253	5.90545e-05	1
22	GO:0046890	BP	regulation of lipid biosynthetic process	22/1709	96/18253	6.09316e-05	1
7	GO:0061311	BP	cell surface receptor signaling pathway involved in heart development	7/1709	13/18253	6.43379e-05	1
7	GO:0009070	BP	serine family amino acid biosynthetic process	7/1709	13/18253	6.43379e-05	1
147	GO:0031327	BP	negative regulation of cellular biosynthetic process	147/1709	1147/18253	6.68041e-05	1
24	GO:0010675	BP	regulation of cellular carbohydrate metabolic process	24/1709	107/18253	6.78959e-05	1
138	GO:2000113	BP	negative regulation of cellular macromolecule biosynthetic process	138/1709	1064/18253	7.14732e-05	1
282	GO:0009058	BP	biosynthetic process	282/1709	2430/18253	7.21353e-05	1
16	GO:0008203	BP	cholesterol metabolic process	16/1709	59/18253	7.24599e-05	1
20	GO:0007623	BP	circadian rhythm	20/1709	84/18253	7.34389e-05	1
135	GO:0009967	BP	positive regulation of signal transduction	135/1709	1038/18253	7.42047e-05	1
39	GO:0097190	BP	apoptotic signaling pathway	39/1709	216/18253	7.93329e-05	1
49	GO:0002252	BP	immune effector process	49/1709	297/18253	7.95848e-05	1
274	GO:1901576	BP	organic substance biosynthetic process	274/1709	2357/18253	8.02186e-05	1
20	GO:0009611	BP	response to wounding	20/1709	85/18253	8.76934e-05	1
148	GO:0009890	BP	negative regulation of biosynthetic process	148/1709	1160/18253	8.9418e-05	1
183	GO:0006796	BP	phosphate-containing compound metabolic process	183/1709	1488/18253	9.28926e-05	1
52	GO:0007389	BP	pattern specification process	52/1709	323/18253	0.000100872	1
24	GO:0006109	BP	regulation of carbohydrate metabolic process	24/1709	112/18253	0.000106369	1
186	GO:0006793	BP	phosphorus metabolic process	186/1709	1520/18253	0.000108513	1
30	GO:0001525	BP	angiogenesis	30/1709	152/18253	0.000108725	1
16	GO:2000106	BP	regulation of leukocyte apoptotic process	16/1709	61/18253	0.000111895	1
141	GO:0045934	BP	negative regulation of nucleobase-containing compound metabolic process	141/1709	1103/18253	0.00011809	1
13	GO:0070228	BP	regulation of lymphocyte apoptotic process	13/1709	44/18253	0.000131603	1
223	GO:0051128	BP	regulation of cellular component organization	223/1709	1877/18253	0.000137265	1
27	GO:0001763	BP	morphogenesis of a branching structure	27/1709	135/18253	0.000142887	1
19	GO:0009108	BP	coenzyme biosynthetic process	19/1709	82/18253	0.000162095	1
16	GO:1902652	BP	secondary alcohol metabolic process	16/1709	63/18253	0.000168914	1
44	GO:1901615	BP	organic hydroxy compound metabolic process	44/1709	265/18253	0.000171259	1
20	GO:0045444	BP	fat cell differentiation	20/1709	89/18253	0.000172253	1
22	GO:0006865	BP	amino acid transport	22/1709	101/18253	0.000183102	1
34	GO:0090287	BP	regulation of cellular response to growth factor stimulus	34/1709	186/18253	0.000185427	1
27	GO:1901652	BP	response to peptide	27/1709	138/18253	0.000192153	1
9	GO:1902475	BP	L-alpha-amino acid transmembrane transport	9/1709	24/18253	0.000192355	1
148	GO:0051172	BP	negative regulation of nitrogen compound metabolic process	148/1709	1181/18253	0.000194608	1
26	GO:0002685	BP	regulation of leukocyte migration	26/1709	130/18253	0.000195777	1
45	GO:0009896	BP	positive regulation of catabolic process	45/1709	273/18253	0.000207982	1
25	GO:0031668	BP	cellular response to extracellular stimulus	25/1709	122/18253	0.000220423	1
22	GO:1904018	BP	positive regulation of vasculature development	22/1709	103/18253	0.000222283	1
25	GO:0051147	BP	regulation of muscle cell differentiation	25/1709	123/18253	0.000233559	1
11	GO:0060761	BP	negative regulation of response to cytokine stimulus	11/1709	35/18253	0.000234965	1
180	GO:0031328	BP	positive regulation of cellular biosynthetic process	180/1709	1487/18253	0.00023885	1
45	GO:0001819	BP	positive regulation of cytokine production	45/1709	278/18253	0.000252916	1
8	GO:0070873	BP	regulation of glycogen metabolic process	8/1709	20/18253	0.00026132	1
63	GO:0040008	BP	regulation of growth	63/1709	425/18253	0.000263276	1
15	GO:0045682	BP	regulation of epidermis development	15/1709	59/18253	0.000264175	1
14	GO:0019217	BP	regulation of fatty acid metabolic process	14/1709	53/18253	0.000273001	1
36	GO:0019216	BP	regulation of lipid metabolic process	36/1709	208/18253	0.000278976	1
31	GO:0009991	BP	response to extracellular stimulus	31/1709	170/18253	0.000284158	1
44	GO:0045786	BP	negative regulation of cell cycle	44/1709	271/18253	0.000305604	1
181	GO:0009891	BP	positive regulation of biosynthetic process	181/1709	1503/18253	0.000305962	1
11	GO:0070169	BP	positive regulation of biomineral tissue development	11/1709	36/18253	0.000309969	1
85	GO:0040012	BP	regulation of locomotion	85/1709	616/18253	0.000310872	1
22	GO:0031669	BP	cellular response to nutrient levels	22/1709	106/18253	0.000311516	1
61	GO:0006820	BP	anion transport	61/1709	413/18253	0.000314437	1
5	GO:0006563	BP	L-serine metabolic process	5/1709	8/18253	0.00031451	1
100	GO:0051241	BP	negative regulation of multicellular organismal process	100/1709	752/18253	0.000326139	1
27	GO:0016054	BP	organic acid catabolic process	27/1709	140/18253	0.000342804	1
27	GO:0046395	BP	carboxylic acid catabolic process	27/1709	140/18253	0.000342804	1
33	GO:0006066	BP	alcohol metabolic process	33/1709	187/18253	0.000343715	1
75	GO:0030334	BP	regulation of cell migration	75/1709	531/18253	0.000352255	1
4	GO:0061312	BP	BMP signaling pathway involved in heart development	4/1709	5/18253	0.000354389	1
37	GO:0003002	BP	regionalization	37/1709	217/18253	0.000360775	1
172	GO:1901362	BP	organic cyclic compound biosynthetic process	172/1709	1419/18253	0.00036251	1
49	GO:0048729	BP	tissue morphogenesis	49/1709	314/18253	0.000384781	1
8	GO:0070286	BP	axonemal dynein complex assembly	8/1709	21/18253	0.000387643	1
8	GO:0006695	BP	cholesterol biosynthetic process	8/1709	21/18253	0.000387643	1
35	GO:0051056	BP	regulation of small GTPase mediated signal transduction	35/1709	204/18253	0.000396974	1
161	GO:0051049	BP	regulation of transport	161/1709	1320/18253	0.000401948	1
11	GO:0045599	BP	negative regulation of fat cell differentiation	11/1709	37/18253	0.00040414	1
43	GO:0032940	BP	secretion by cell	43/1709	266/18253	0.000404476	1
18	GO:1905039	BP	carboxylic acid transmembrane transport	18/1709	81/18253	0.000413114	1
21	GO:0072330	BP	monocarboxylic acid biosynthetic process	21/1709	101/18253	0.000422449	1
21	GO:0009267	BP	cellular response to starvation	21/1709	101/18253	0.000422449	1
12	GO:0032922	BP	circadian regulation of gene expression	12/1709	43/18253	0.000426161	1
15	GO:0070167	BP	regulation of biomineral tissue development	15/1709	62/18253	0.000471376	1
10	GO:0001960	BP	negative regulation of cytokine-mediated signaling pathway	10/1709	32/18253	0.000473637	1
170	GO:0010557	BP	positive regulation of macromolecule biosynthetic process	170/1709	1411/18253	0.000502854	1
14	GO:0030500	BP	regulation of bone mineralization	14/1709	56/18253	0.000504851	1
130	GO:0002376	BP	immune system process	130/1709	1035/18253	0.000519822	1
13	GO:0015807	BP	L-amino acid transport	13/1709	50/18253	0.000528626	1
9	GO:0035987	BP	endodermal cell differentiation	9/1709	27/18253	0.000532457	1
21	GO:0001568	BP	blood vessel development	21/1709	103/18253	0.000533732	1
46	GO:0007169	BP	transmembrane receptor protein tyrosine kinase signaling pathway	46/1709	294/18253	0.000534944	1
254	GO:0065009	BP	regulation of molecular function	254/1709	2223/18253	0.000536807	1
17	GO:0032868	BP	response to insulin	17/1709	76/18253	0.000545697	1
50	GO:0040017	BP	positive regulation of locomotion	50/1709	329/18253	0.0005542	1
8	GO:1902653	BP	secondary alcohol biosynthetic process	8/1709	22/18253	0.000559449	1
8	GO:0042481	BP	regulation of odontogenesis	8/1709	22/18253	0.000559449	1
34	GO:1901565	BP	organonitrogen compound catabolic process	34/1709	200/18253	0.000563731	1
34	GO:0098656	BP	anion transmembrane transport	34/1709	200/18253	0.000563731	1
15	GO:0003333	BP	amino acid transmembrane transport	15/1709	63/18253	0.000565895	1
40	GO:0002009	BP	morphogenesis of an epithelium	40/1709	247/18253	0.000578529	1
19	GO:0002687	BP	positive regulation of leukocyte migration	19/1709	88/18253	0.000597153	1
19	GO:0001649	BP	osteoblast differentiation	19/1709	88/18253	0.000597153	1
49	GO:0051272	BP	positive regulation of cellular component movement	49/1709	318/18253	0.000604324	1
28	GO:0031667	BP	response to nutrient levels	28/1709	152/18253	0.000618508	1
10	GO:0030501	BP	positive regulation of bone mineralization	10/1709	33/18253	0.00062309	1
175	GO:0045935	BP	positive regulation of nucleobase-containing compound metabolic process	175/1709	1465/18253	0.000627273	1
6	GO:0031065	BP	positive regulation of histone deacetylation	6/1709	13/18253	0.000641898	1
5	GO:0060602	BP	branch elongation of an epithelium	5/1709	9/18253	0.000652978	1
5	GO:0070255	BP	regulation of mucus secretion	5/1709	9/18253	0.000652978	1
31	GO:0035239	BP	tube morphogenesis	31/1709	178/18253	0.000662906	1
11	GO:0045604	BP	regulation of epidermal cell differentiation	11/1709	39/18253	0.000665168	1
15	GO:0045778	BP	positive regulation of ossification	15/1709	64/18253	0.000676102	1
9	GO:0060349	BP	bone morphogenesis	9/1709	28/18253	0.000720043	1
22	GO:0042594	BP	response to starvation	22/1709	110/18253	0.000728323	1
14	GO:0043200	BP	response to amino acid	14/1709	58/18253	0.000738648	1
75	GO:0002684	BP	positive regulation of immune system process	75/1709	546/18253	0.000746911	1
47	GO:0015711	BP	organic anion transport	47/1709	308/18253	0.000749287	1
33	GO:0046942	BP	carboxylic acid transport	33/1709	195/18253	0.000751969	1
31	GO:1901342	BP	regulation of vasculature development	31/1709	180/18253	0.000756052	1
18	GO:1901653	BP	cellular response to peptide	18/1709	82/18253	0.000793402	1
30	GO:0090092	BP	regulation of transmembrane receptor protein serine/threonine kinase signaling pathway	30/1709	171/18253	0.000802253	1
3	GO:0010657	BP	muscle cell apoptotic process	3/1709	3/18253	0.000819468	1
3	GO:0006564	BP	L-serine biosynthetic process	3/1709	3/18253	0.000819468	1
12	GO:0071230	BP	cellular response to amino acid stimulus	12/1709	46/18253	0.000830459	1
12	GO:0048015	BP	phosphatidylinositol-mediated signaling	12/1709	46/18253	0.000830459	1
82	GO:0051270	BP	regulation of cellular component movement	82/1709	609/18253	0.000838644	1
11	GO:0048706	BP	embryonic skeletal system development	11/1709	40/18253	0.00084078	1
11	GO:0043620	BP	regulation of DNA-templated transcription in response to stress	11/1709	40/18253	0.00084078	1
76	GO:2000145	BP	regulation of cell motility	76/1709	558/18253	0.00085555	1
151	GO:1901564	BP	organonitrogen compound metabolic process	151/1709	1245/18253	0.00085883	1
108	GO:0002682	BP	regulation of immune system process	108/1709	847/18253	0.000868495	1
116	GO:0080134	BP	regulation of response to stress	116/1709	922/18253	0.000919346	1
83	GO:0045597	BP	positive regulation of cell differentiation	83/1709	619/18253	0.000922344	1
34	GO:0006631	BP	fatty acid metabolic process	34/1709	204/18253	0.000947994	1
9	GO:0032651	BP	regulation of interleukin-1 beta production	9/1709	29/18253	0.000958167	1
9	GO:0009112	BP	nucleobase metabolic process	9/1709	29/18253	0.000958167	1
9	GO:0042149	BP	cellular response to glucose starvation	9/1709	29/18253	0.000958167	1
13	GO:0010827	BP	regulation of glucose transport	13/1709	53/18253	0.000961665	1
66	GO:0051046	BP	regulation of secretion	66/1709	472/18253	0.000971371	1
22	GO:0048562	BP	embryonic organ morphogenesis	22/1709	114/18253	0.00097626	1
19	GO:0045766	BP	positive regulation of angiogenesis	19/1709	93/18253	0.000979792	1
4	GO:0021924	BP	cell proliferation in external granule layer	4/1709	6/18253	0.000983966	1
4	GO:0002467	BP	germinal center formation	4/1709	6/18253	0.000983966	1
4	GO:0070244	BP	negative regulation of thymocyte apoptotic process	4/1709	6/18253	0.000983966	1
4	GO:0021534	BP	cell proliferation in hindbrain	4/1709	6/18253	0.000983966	1
4	GO:0006527	BP	arginine catabolic process	4/1709	6/18253	0.000983966	1
4	GO:1905114	BP	cell surface receptor signaling pathway involved in cell-cell signaling	4/1709	6/18253	0.000983966	1
4	GO:0021930	BP	cerebellar granule cell precursor proliferation	4/1709	6/18253	0.000983966	1
66	GO:0045596	BP	negative regulation of cell differentiation	66/1709	473/18253	0.000990537	1
17	GO:0006412	BP	translation	17/1709	364/18253	0.00101172	1
24	GO:0061138	BP	morphogenesis of a branching epithelium	24/1709	127/18253	0.00102167	1
27	GO:0048511	BP	rhythmic process	27/1709	151/18253	0.00102989	1
27	GO:0060828	BP	regulation of canonical Wnt signaling pathway	27/1709	151/18253	0.00102989	1
6	GO:0003351	BP	epithelial cilium movement	6/1709	14/18253	0.00103462	1
6	GO:0003401	BP	axis elongation	6/1709	14/18253	0.00103462	1
10	GO:0032652	BP	regulation of interleukin-1 production	10/1709	35/18253	0.00103921	1
81	GO:0043066	BP	negative regulation of apoptotic process	81/1709	607/18253	0.00107461	1
54	GO:0033993	BP	response to lipid	54/1709	370/18253	0.00108405	1
8	GO:0032881	BP	regulation of polysaccharide metabolic process	8/1709	24/18253	0.0010857	1
34	GO:0048608	BP	reproductive structure development	34/1709	207/18253	0.00109324	1
19	GO:1903825	BP	organic acid transmembrane transport	19/1709	94/18253	0.0010972	1
15	GO:0009799	BP	specification of symmetry	15/1709	67/18253	0.00112208	1
7	GO:0002504	BP	antigen processing and presentation of peptide or polysaccharide antigen via MHC class II	7/1709	19/18253	0.00114094	1
31	GO:0046578	BP	regulation of Ras protein signal transduction	31/1709	182/18253	0.00117335	1
5	GO:0070243	BP	regulation of thymocyte apoptotic process	5/1709	10/18253	0.00120532	1
18	GO:0043043	BP	peptide biosynthetic process	18/1709	376/18253	0.00120676	1
82	GO:0043069	BP	negative regulation of programmed cell death	82/1709	619/18253	0.00120876	1
11	GO:0042060	BP	wound healing	11/1709	42/18253	0.00130773	1
179	GO:0051173	BP	positive regulation of nitrogen compound metabolic process	179/1709	1528/18253	0.00130842	1
15	GO:0002690	BP	positive regulation of leukocyte chemotaxis	15/1709	68/18253	0.00131718	1
80	GO:0032101	BP	regulation of response to external stimulus	80/1709	602/18253	0.00131841	1
10	GO:0001944	BP	vasculature development	10/1709	36/18253	0.00131969	1
68	GO:0044712	BP	single-organism catabolic process	68/1709	497/18253	0.00133656	1
21	GO:0001501	BP	skeletal system development	21/1709	109/18253	0.00133881	1
87	GO:0060548	BP	negative regulation of cell death	87/1709	665/18253	0.00138331	1
56	GO:1901698	BP	response to nitrogen compound	56/1709	390/18253	0.00145477	1
8	GO:0001961	BP	positive regulation of cytokine-mediated signaling pathway	8/1709	25/18253	0.00146687	1
8	GO:0070229	BP	negative regulation of lymphocyte apoptotic process	8/1709	25/18253	0.00146687	1
8	GO:0070232	BP	regulation of T cell apoptotic process	8/1709	25/18253	0.00146687	1
12	GO:0030317	BP	sperm motility	12/1709	49/18253	0.00151367	1
12	GO:0048017	BP	inositol lipid-mediated signaling	12/1709	49/18253	0.00151367	1
46	GO:2000147	BP	positive regulation of cell motility	46/1709	309/18253	0.00152918	1
85	GO:0051093	BP	negative regulation of developmental process	85/1709	649/18253	0.00153874	1
44	GO:0010817	BP	regulation of hormone levels	44/1709	292/18253	0.00156796	1
6	GO:0002294	BP	CD4-positive, alpha-beta T cell differentiation involved in immune response	6/1709	15/18253	0.00158849	1
6	GO:0042093	BP	T-helper cell differentiation	6/1709	15/18253	0.00158849	1
6	GO:0046112	BP	nucleobase biosynthetic process	6/1709	15/18253	0.00158849	1
34	GO:0015849	BP	organic acid transport	34/1709	208/18253	0.00163052	1
306	GO:1901360	BP	organic cyclic compound metabolic process	306/1709	2781/18253	0.00163836	1
13	GO:0072073	BP	kidney epithelium development	13/1709	56/18253	0.00165829	1
10	GO:0043618	BP	regulation of transcription from RNA polymerase II promoter in response to stress	10/1709	37/18253	0.00165878	1
45	GO:0030335	BP	positive regulation of cell migration	45/1709	300/18253	0.0017866	1
17	GO:0045667	BP	regulation of osteoblast differentiation	17/1709	83/18253	0.00183439	1
16	GO:0010906	BP	regulation of glucose metabolic process	16/1709	74/18253	0.00184066	1
16	GO:0051153	BP	regulation of striated muscle cell differentiation	16/1709	74/18253	0.00184066	1
155	GO:0044093	BP	positive regulation of molecular function	155/1709	1309/18253	0.00189659	1
78	GO:0008284	BP	positive regulation of cell proliferation	78/1709	589/18253	0.00190851	1
2	GO:0007187	BP	G-protein coupled receptor signaling pathway, coupled to cyclic nucleotide second messenger	2/1709	116/18253	0.00194351	1
8	GO:0060760	BP	positive regulation of response to cytokine stimulus	8/1709	26/18253	0.00194688	1
81	GO:0009628	BP	response to abiotic stimulus	81/1709	619/18253	0.00195066	1
16	GO:0048514	BP	blood vessel morphogenesis	16/1709	75/18253	0.00196496	1
11	GO:0050810	BP	regulation of steroid biosynthetic process	11/1709	44/18253	0.00196881	1
20	GO:0030856	BP	regulation of epithelial cell differentiation	20/1709	105/18253	0.00199278	1
20	GO:0043434	BP	response to peptide hormone	20/1709	105/18253	0.00199278	1
66	GO:0043087	BP	regulation of GTPase activity	66/1709	486/18253	0.00201342	1
50	GO:0002694	BP	regulation of leukocyte activation	50/1709	347/18253	0.00203559	1
5	GO:0006525	BP	arginine metabolic process	5/1709	11/18253	0.0020399	1
110	GO:0016310	BP	phosphorylation	110/1709	886/18253	0.00206405	1
4	GO:0018065	BP	protein-cofactor linkage	4/1709	7/18253	0.00212546	1
4	GO:0070493	BP	thrombin receptor signaling pathway	4/1709	7/18253	0.00212546	1
4	GO:0032909	BP	regulation of transforming growth factor beta2 production	4/1709	7/18253	0.00212546	1
61	GO:0008285	BP	negative regulation of cell proliferation	61/1709	443/18253	0.00216184	1
12	GO:0061035	BP	regulation of cartilage development	12/1709	51/18253	0.00218637	1
12	GO:0001837	BP	epithelial to mesenchymal transition	12/1709	51/18253	0.00218637	1
7	GO:0034405	BP	response to fluid shear stress	7/1709	21/18253	0.00222805	1
70	GO:0080135	BP	regulation of cellular response to stress	70/1709	524/18253	0.00227341	1
16	GO:0006633	BP	fatty acid biosynthetic process	16/1709	77/18253	0.00230915	1
51	GO:0055086	BP	nucleobase-containing small molecule metabolic process	51/1709	357/18253	0.00233008	1
6	GO:0006144	BP	purine nucleobase metabolic process	6/1709	16/18253	0.00234171	1
6	GO:0002076	BP	osteoblast development	6/1709	16/18253	0.00234171	1
6	GO:0009065	BP	glutamine family amino acid catabolic process	6/1709	16/18253	0.00234171	1
6	GO:0070233	BP	negative regulation of T cell apoptotic process	6/1709	16/18253	0.00234171	1
101	GO:0055114	BP	oxidation-reduction process	101/1709	806/18253	0.00238574	1
11	GO:2000379	BP	positive regulation of reactive oxygen species metabolic process	11/1709	45/18253	0.00238896	1
14	GO:0007368	BP	determination of left/right symmetry	14/1709	65/18253	0.00239062	1
19	GO:0090288	BP	negative regulation of cellular response to growth factor stimulus	19/1709	98/18253	0.00239439	1
59	GO:0007154	BP	cell communication	59/1709	428/18253	0.00242348	1
158	GO:0018130	BP	heterocycle biosynthetic process	158/1709	1344/18253	0.00251989	1
49	GO:0046903	BP	secretion	49/1709	341/18253	0.00252423	1
17	GO:0002688	BP	regulation of leukocyte chemotaxis	17/1709	86/18253	0.00253001	1
8	GO:0014065	BP	phosphatidylinositol 3-kinase signaling	8/1709	27/18253	0.00254242	1
8	GO:0010464	BP	regulation of mesenchymal cell proliferation	8/1709	27/18253	0.00254242	1
20	GO:0048754	BP	branching morphogenesis of an epithelial tube	20/1709	108/18253	0.00257993	1
60	GO:0003006	BP	developmental process involved in reproduction	60/1709	436/18253	0.00260601	1
60	GO:0001817	BP	regulation of cytokine production	60/1709	437/18253	0.00264605	1
347	GO:0010468	BP	regulation of gene expression	347/1709	3217/18253	0.00267808	1
35	GO:0032103	BP	positive regulation of response to external stimulus	35/1709	226/18253	0.0026956	1
13	GO:0006694	BP	steroid biosynthetic process	13/1709	59/18253	0.0027281	1
19	GO:0032946	BP	positive regulation of mononuclear cell proliferation	19/1709	100/18253	0.00274246	1
52	GO:0050865	BP	regulation of cell activation	52/1709	370/18253	0.00283753	1
128	GO:0043085	BP	positive regulation of catalytic activity	128/1709	1065/18253	0.00284456	1
24	GO:2000027	BP	regulation of organ morphogenesis	24/1709	138/18253	0.00289211	1
38	GO:0001558	BP	regulation of cell growth	38/1709	250/18253	0.00291622	1
79	GO:0044255	BP	cellular lipid metabolic process	79/1709	610/18253	0.00292081	1
30	GO:0006732	BP	coenzyme metabolic process	30/1709	183/18253	0.00297068	1
15	GO:0072331	BP	signal transduction by p53 class mediator	15/1709	71/18253	0.0029983	1
15	GO:0046165	BP	alcohol biosynthetic process	15/1709	71/18253	0.0029983	1
7	GO:0090023	BP	positive regulation of neutrophil chemotaxis	7/1709	22/18253	0.00300673	1
3	GO:0060438	BP	trachea development	3/1709	4/18253	0.00304806	1
3	GO:0043435	BP	response to corticotropin-releasing hormone	3/1709	4/18253	0.00304806	1
3	GO:0009249	BP	protein lipoylation	3/1709	4/18253	0.00304806	1
3	GO:0070424	BP	regulation of nucleotide-binding oligomerization domain containing signaling pathway	3/1709	4/18253	0.00304806	1
3	GO:0072104	BP	glomerular capillary formation	3/1709	4/18253	0.00304806	1
3	GO:0071376	BP	cellular response to corticotropin-releasing hormone stimulus	3/1709	4/18253	0.00304806	1
3	GO:0045063	BP	T-helper 1 cell differentiation	3/1709	4/18253	0.00304806	1
3	GO:0048102	BP	autophagic cell death	3/1709	4/18253	0.00304806	1
3	GO:0006566	BP	threonine metabolic process	3/1709	4/18253	0.00304806	1
3	GO:0070432	BP	regulation of nucleotide-binding oligomerization domain containing 2 signaling pathway	3/1709	4/18253	0.00304806	1
3	GO:0060449	BP	bud elongation involved in lung branching	3/1709	4/18253	0.00304806	1
3	GO:0039534	BP	negative regulation of MDA-5 signaling pathway	3/1709	4/18253	0.00304806	1
10	GO:0009066	BP	aspartate family amino acid metabolic process	10/1709	40/18253	0.00311681	1
10	GO:0002062	BP	chondrocyte differentiation	10/1709	40/18253	0.00311681	1
13	GO:0032642	BP	regulation of chemokine production	13/1709	60/18253	0.00319006	1
13	GO:0019218	BP	regulation of steroid metabolic process	13/1709	60/18253	0.00319006	1
19	GO:0048705	BP	skeletal system morphogenesis	19/1709	102/18253	0.00321327	1
15	GO:0030510	BP	regulation of BMP signaling pathway	15/1709	72/18253	0.00323661	1
8	GO:0002720	BP	positive regulation of cytokine production involved in immune response	8/1709	28/18253	0.00327137	1
8	GO:0003156	BP	regulation of organ formation	8/1709	28/18253	0.00327137	1
9	GO:2000107	BP	negative regulation of leukocyte apoptotic process	9/1709	34/18253	0.00327204	1
6	GO:0002293	BP	alpha-beta T cell differentiation involved in immune response	6/1709	17/18253	0.003335	1
6	GO:0006536	BP	glutamate metabolic process	6/1709	17/18253	0.003335	1
6	GO:0002287	BP	alpha-beta T cell activation involved in immune response	6/1709	17/18253	0.003335	1
6	GO:0005979	BP	regulation of glycogen biosynthetic process	6/1709	17/18253	0.003335	1
6	GO:0008209	BP	androgen metabolic process	6/1709	17/18253	0.003335	1
6	GO:0010962	BP	regulation of glucan biosynthetic process	6/1709	17/18253	0.003335	1
18	GO:0045598	BP	regulation of fat cell differentiation	18/1709	93/18253	0.00335535	1
16	GO:0071248	BP	cellular response to metal ion	16/1709	81/18253	0.00344354	1
11	GO:0032869	BP	cellular response to insulin stimulus	11/1709	47/18253	0.00344628	1
11	GO:0042475	BP	odontogenesis of dentin-containing tooth	11/1709	47/18253	0.00344628	1
88	GO:0022610	BP	biological adhesion	88/1709	696/18253	0.00344949	1
24	GO:0050920	BP	regulation of chemotaxis	24/1709	141/18253	0.0034713	1
54	GO:1902532	BP	negative regulation of intracellular signal transduction	54/1709	390/18253	0.00357581	1
12	GO:0034754	BP	cellular hormone metabolic process	12/1709	54/18253	0.00363544	1
46	GO:0001933	BP	negative regulation of protein phosphorylation	46/1709	323/18253	0.00374244	1
49	GO:0012501	BP	programmed cell death	49/1709	348/18253	0.00380534	1
19	GO:0071229	BP	cellular response to acid chemical	19/1709	104/18253	0.00382094	1
16	GO:0060560	BP	developmental growth involved in morphogenesis	16/1709	82/18253	0.00383576	1
25	GO:0001101	BP	response to acid chemical	25/1709	147/18253	0.00387733	1
42	GO:0009725	BP	response to hormone	42/1709	286/18253	0.00389399	1
23	GO:0043604	BP	amide biosynthetic process	23/1709	420/18253	0.00390037	1
4	GO:0006977	BP	DNA damage response, signal transduction by p53 class mediator resulting in cell cycle arrest	4/1709	8/18253	0.00393642	1
4	GO:0045657	BP	positive regulation of monocyte differentiation	4/1709	8/18253	0.00393642	1
4	GO:0061081	BP	positive regulation of myeloid leukocyte cytokine production involved in immune response	4/1709	8/18253	0.00393642	1
4	GO:0060340	BP	positive regulation of type I interferon-mediated signaling pathway	4/1709	8/18253	0.00393642	1
4	GO:0043619	BP	regulation of transcription from RNA polymerase II promoter in response to oxidative stress	4/1709	8/18253	0.00393642	1
4	GO:0060294	BP	cilium movement involved in cell motility	4/1709	8/18253	0.00393642	1
4	GO:0006809	BP	nitric oxide biosynthetic process	4/1709	8/18253	0.00393642	1
4	GO:0034616	BP	response to laminar fluid shear stress	4/1709	8/18253	0.00393642	1
4	GO:0003184	BP	pulmonary valve morphogenesis	4/1709	8/18253	0.00393642	1
4	GO:0048617	BP	embryonic foregut morphogenesis	4/1709	8/18253	0.00393642	1
4	GO:0042482	BP	positive regulation of odontogenesis	4/1709	8/18253	0.00393642	1
7	GO:0061036	BP	positive regulation of cartilage development	7/1709	23/18253	0.00397745	1
7	GO:0071624	BP	positive regulation of granulocyte chemotaxis	7/1709	23/18253	0.00397745	1
7	GO:0060612	BP	adipose tissue development	7/1709	23/18253	0.00397745	1
49	GO:0042326	BP	negative regulation of phosphorylation	49/1709	350/18253	0.00399321	1
253	GO:0044249	BP	cellular biosynthetic process	253/1709	2295/18253	0.00404077	1
9	GO:0034198	BP	cellular response to amino acid starvation	9/1709	35/18253	0.00404494	1
9	GO:0010828	BP	positive regulation of glucose transport	9/1709	35/18253	0.00404494	1
9	GO:0016236	BP	macroautophagy	9/1709	35/18253	0.00404494	1
2	GO:0007188	BP	adenylate cyclase-modulating G-protein coupled receptor signaling pathway	2/1709	108/18253	0.00405956	1
132	GO:0042325	BP	regulation of phosphorylation	132/1709	1112/18253	0.00407062	1
18	GO:0051262	BP	protein tetramerization	18/1709	96/18253	0.00407128	1
87	GO:0007155	BP	cell adhesion	87/1709	692/18253	0.00418267	1
42	GO:0090407	BP	organophosphate biosynthetic process	42/1709	290/18253	0.00424599	1
15	GO:0030324	BP	lung development	15/1709	75/18253	0.00425724	1
12	GO:0051701	BP	interaction with host	12/1709	55/18253	0.00426193	1
14	GO:0009855	BP	determination of bilateral symmetry	14/1709	66/18253	0.00428086	1
1	GO:0009582	BP	detection of abiotic stimulus	1/1709	85/18253	0.00429894	1
27	GO:0045926	BP	negative regulation of growth	27/1709	165/18253	0.00429958	1
18	GO:0050921	BP	positive regulation of chemotaxis	18/1709	97/18253	0.00439393	1
31	GO:0044282	BP	small molecule catabolic process	31/1709	198/18253	0.00439937	1
17	GO:0033365	BP	protein localization to organelle	17/1709	337/18253	0.00443657	1
100	GO:0009605	BP	response to external stimulus	100/1709	810/18253	0.00443916	1
506	GO:0019222	BP	regulation of metabolic process	506/1709	4870/18253	0.00444936	1
6	GO:0006984	BP	ER-nucleus signaling pathway	6/1709	18/18253	0.00461075	1
6	GO:0042474	BP	middle ear morphogenesis	6/1709	18/18253	0.00461075	1
6	GO:0002063	BP	chondrocyte development	6/1709	18/18253	0.00461075	1
6	GO:0090312	BP	positive regulation of protein deacetylation	6/1709	18/18253	0.00461075	1
17	GO:0090090	BP	negative regulation of canonical Wnt signaling pathway	17/1709	88/18253	0.0047273	1
271	GO:1902578	BP	single-organism localization	271/1709	2482/18253	0.0048323	1
5	GO:2000727	BP	positive regulation of cardiac muscle cell differentiation	5/1709	13/18253	0.00484573	1
5	GO:2000505	BP	regulation of energy homeostasis	5/1709	13/18253	0.00484573	1
5	GO:0032495	BP	response to muramyl dipeptide	5/1709	13/18253	0.00484573	1
11	GO:0032677	BP	regulation of interleukin-8 production	11/1709	49/18253	0.00484859	1
11	GO:0060411	BP	cardiac septum morphogenesis	11/1709	49/18253	0.00484859	1
11	GO:0031338	BP	regulation of vesicle fusion	11/1709	49/18253	0.00484859	1
51	GO:0071705	BP	nitrogen compound transport	51/1709	369/18253	0.00491365	1
14	GO:0060021	BP	palate development	14/1709	68/18253	0.0049412	1
9	GO:1902930	BP	regulation of alcohol biosynthetic process	9/1709	36/18253	0.00495336	1
12	GO:0006720	BP	isoprenoid metabolic process	12/1709	56/18253	0.00497201	1
12	GO:0032755	BP	positive regulation of interleukin-6 production	12/1709	56/18253	0.00497201	1
123	GO:0001932	BP	regulation of protein phosphorylation	123/1709	1034/18253	0.00502313	1
69	GO:0007275	BP	multicellular organism development	69/1709	531/18253	0.00504635	1
34	GO:0031331	BP	positive regulation of cellular catabolic process	34/1709	223/18253	0.0050736	1
198	GO:0050790	BP	regulation of catalytic activity	198/1709	1760/18253	0.00511467	1
69	GO:0009894	BP	regulation of catabolic process	69/1709	532/18253	0.00512314	1
153	GO:0071702	BP	organic substance transport	153/1709	1322/18253	0.00516568	1
7	GO:0070059	BP	intrinsic apoptotic signaling pathway in response to endoplasmic reticulum stress	7/1709	24/18253	0.00516817	1
7	GO:0045601	BP	regulation of endothelial cell differentiation	7/1709	24/18253	0.00516817	1
7	GO:1902893	BP	regulation of pri-miRNA transcription from RNA polymerase II promoter	7/1709	24/18253	0.00516817	1
18	GO:0050671	BP	positive regulation of lymphocyte proliferation	18/1709	99/18253	0.00517823	1
8	GO:0048661	BP	positive regulation of smooth muscle cell proliferation	8/1709	30/18253	0.00520578	1
8	GO:0071158	BP	positive regulation of cell cycle arrest	8/1709	30/18253	0.00520578	1
51	GO:0008219	BP	cell death	51/1709	372/18253	0.00522049	1
15	GO:0090101	BP	negative regulation of transmembrane receptor protein serine/threonine kinase signaling pathway	15/1709	77/18253	0.00522578	1
80	GO:0060284	BP	regulation of cell development	80/1709	634/18253	0.00546171	1
11	GO:0002718	BP	regulation of cytokine production involved in immune response	11/1709	50/18253	0.00570147	1
28	GO:0060429	BP	epithelium development	28/1709	176/18253	0.0057384	1
74	GO:0006955	BP	immune response	74/1709	579/18253	0.0057528	1
20	GO:0023061	BP	signal release	20/1709	115/18253	0.00583527	1
28	GO:0002237	BP	response to molecule of bacterial origin	28/1709	177/18253	0.00592749	1
68	GO:0051223	BP	regulation of protein transport	68/1709	524/18253	0.00598233	1
9	GO:0060485	BP	mesenchyme development	9/1709	37/18253	0.00601233	1
9	GO:0032330	BP	regulation of chondrocyte differentiation	9/1709	37/18253	0.00601233	1
19	GO:0070665	BP	positive regulation of leukocyte proliferation	19/1709	105/18253	0.00606161	1
86	GO:0051726	BP	regulation of cell cycle	86/1709	690/18253	0.0061763	1
6	GO:0051150	BP	regulation of smooth muscle cell differentiation	6/1709	19/18253	0.0062122	1
6	GO:0031063	BP	regulation of histone deacetylation	6/1709	19/18253	0.0062122	1
56	GO:0006366	BP	transcription from RNA polymerase II promoter	56/1709	418/18253	0.00635377	1
3	GO:0006413	BP	translational initiation	3/1709	117/18253	0.00636801	1
14	GO:0071375	BP	cellular response to peptide hormone stimulus	14/1709	71/18253	0.00647967	1
26	GO:0032496	BP	response to lipopolysaccharide	26/1709	163/18253	0.00648834	1
17	GO:0071241	BP	cellular response to inorganic substance	17/1709	93/18253	0.00650543	1
17	GO:0045834	BP	positive regulation of lipid metabolic process	17/1709	93/18253	0.00650543	1
69	GO:0032989	BP	cellular component morphogenesis	69/1709	535/18253	0.00651376	1
35	GO:0051047	BP	positive regulation of secretion	35/1709	236/18253	0.00652708	1
4	GO:2001053	BP	regulation of mesenchymal cell apoptotic process	4/1709	9/18253	0.00656317	1
4	GO:0046209	BP	nitric oxide metabolic process	4/1709	9/18253	0.00656317	1
4	GO:2000484	BP	positive regulation of interleukin-8 secretion	4/1709	9/18253	0.00656317	1
4	GO:0072431	BP	signal transduction involved in mitotic G1 DNA damage checkpoint	4/1709	9/18253	0.00656317	1
4	GO:1902400	BP	intracellular signal transduction involved in G1 DNA damage checkpoint	4/1709	9/18253	0.00656317	1
7	GO:0010574	BP	regulation of vascular endothelial growth factor production	7/1709	25/18253	0.00660757	1
7	GO:0042304	BP	regulation of fatty acid biosynthetic process	7/1709	25/18253	0.00660757	1
26	GO:0006518	BP	peptide metabolic process	26/1709	452/18253	0.00674719	1
21	GO:0051188	BP	cofactor biosynthetic process	21/1709	121/18253	0.00677686	1
21	GO:0034976	BP	response to endoplasmic reticulum stress	21/1709	121/18253	0.00677686	1
5	GO:0061053	BP	somite development	5/1709	14/18253	0.00696301	1
5	GO:0002313	BP	mature B cell differentiation involved in immune response	5/1709	14/18253	0.00696301	1
5	GO:0050706	BP	regulation of interleukin-1 beta secretion	5/1709	14/18253	0.00696301	1
17	GO:2000377	BP	regulation of reactive oxygen species metabolic process	17/1709	94/18253	0.00704119	1
3	GO:0021871	BP	forebrain regionalization	3/1709	5/18253	0.00708857	1
3	GO:0032792	BP	negative regulation of CREB transcription factor activity	3/1709	5/18253	0.00708857	1
3	GO:0032366	BP	intracellular sterol transport	3/1709	5/18253	0.00708857	1
3	GO:0032367	BP	intracellular cholesterol transport	3/1709	5/18253	0.00708857	1
3	GO:0071225	BP	cellular response to muramyl dipeptide	3/1709	5/18253	0.00708857	1
3	GO:0061072	BP	iris morphogenesis	3/1709	5/18253	0.00708857	1
3	GO:0071472	BP	cellular response to salt stress	3/1709	5/18253	0.00708857	1
3	GO:0060907	BP	positive regulation of macrophage cytokine production	3/1709	5/18253	0.00708857	1
3	GO:0006003	BP	fructose 2,6-bisphosphate metabolic process	3/1709	5/18253	0.00708857	1
3	GO:0039533	BP	regulation of MDA-5 signaling pathway	3/1709	5/18253	0.00708857	1
3	GO:0003413	BP	chondrocyte differentiation involved in endochondral bone morphogenesis	3/1709	5/18253	0.00708857	1
3	GO:0048570	BP	notochord morphogenesis	3/1709	5/18253	0.00708857	1
9	GO:0061448	BP	connective tissue development	9/1709	38/18253	0.00723734	1
31	GO:0000902	BP	cell morphogenesis	31/1709	204/18253	0.0072978	1
19	GO:1901617	BP	organic hydroxy compound biosynthetic process	19/1709	109/18253	0.00741614	1
46	GO:0043410	BP	positive regulation of MAPK cascade	46/1709	333/18253	0.00755794	1
10	GO:0046324	BP	regulation of glucose import	10/1709	45/18253	0.00763826	1
10	GO:0035914	BP	skeletal muscle cell differentiation	10/1709	45/18253	0.00763826	1
10	GO:0042440	BP	pigment metabolic process	10/1709	45/18253	0.00763826	1
58	GO:0031329	BP	regulation of cellular catabolic process	58/1709	439/18253	0.00770972	1
11	GO:0042733	BP	embryonic digit morphogenesis	11/1709	52/18253	0.00775837	1
86	GO:0040011	BP	locomotion	86/1709	696/18253	0.0078154	1
19	GO:0030178	BP	negative regulation of Wnt signaling pathway	19/1709	110/18253	0.00789784	1
8	GO:0048536	BP	spleen development	8/1709	32/18253	0.00790986	1
14	GO:0009791	BP	post-embryonic development	14/1709	73/18253	0.00792047	1
14	GO:0072091	BP	regulation of stem cell proliferation	14/1709	73/18253	0.00792047	1
6	GO:2000725	BP	regulation of cardiac muscle cell differentiation	6/1709	20/18253	0.00818261	1
6	GO:1901522	BP	positive regulation of transcription from RNA polymerase II promoter involved in cellular response to chemical stimulus	6/1709	20/18253	0.00818261	1
6	GO:0002053	BP	positive regulation of mesenchymal cell proliferation	6/1709	20/18253	0.00818261	1
6	GO:0046320	BP	regulation of fatty acid oxidation	6/1709	20/18253	0.00818261	1
6	GO:0051452	BP	intracellular pH reduction	6/1709	20/18253	0.00818261	1
13	GO:0090630	BP	activation of GTPase activity	13/1709	65/18253	0.00820333	1
39	GO:0045785	BP	positive regulation of cell adhesion	39/1709	272/18253	0.00828662	1
16	GO:0032675	BP	regulation of interleukin-6 production	16/1709	87/18253	0.0083199	1
7	GO:0060325	BP	face morphogenesis	7/1709	26/18253	0.00832466	1
7	GO:1902624	BP	positive regulation of neutrophil migration	7/1709	26/18253	0.00832466	1
7	GO:0046718	BP	viral entry into host cell	7/1709	26/18253	0.00832466	1
7	GO:0052192	BP	movement in environment of other organism involved in symbiotic interaction	7/1709	26/18253	0.00832466	1
7	GO:0051806	BP	entry into cell of other organism involved in symbiotic interaction	7/1709	26/18253	0.00832466	1
7	GO:0051828	BP	entry into other organism involved in symbiotic interaction	7/1709	26/18253	0.00832466	1
7	GO:0030260	BP	entry into host cell	7/1709	26/18253	0.00832466	1
7	GO:0044409	BP	entry into host	7/1709	26/18253	0.00832466	1
7	GO:0052126	BP	movement in host environment	7/1709	26/18253	0.00832466	1
18	GO:0010927	BP	cellular component assembly involved in morphogenesis	18/1709	100/18253	0.00843831	1
47	GO:0060627	BP	regulation of vesicle-mediated transport	47/1709	344/18253	0.00858418	1
23	GO:0090087	BP	regulation of peptide transport	23/1709	142/18253	0.00860905	1
2	GO:0015942	BP	formate metabolic process	2/1709	2/18253	0.00876164	1
2	GO:0014722	BP	regulation of skeletal muscle contraction by calcium ion signaling	2/1709	2/18253	0.00876164	1
2	GO:0036413	BP	histone H3-R26 citrullination	2/1709	2/18253	0.00876164	1
2	GO:0000448	BP	cleavage in ITS2 between 5.8S rRNA and LSU-rRNA of tricistronic rRNA transcript (SSU-rRNA, 5.8S rRNA, LSU-rRNA)	2/1709	2/18253	0.00876164	1
2	GO:2001055	BP	positive regulation of mesenchymal cell apoptotic process	2/1709	2/18253	0.00876164	1
2	GO:0002537	BP	nitric oxide production involved in inflammatory response	2/1709	2/18253	0.00876164	1
2	GO:2000566	BP	positive regulation of CD8-positive, alpha-beta T cell proliferation	2/1709	2/18253	0.00876164	1
2	GO:0030185	BP	nitric oxide transport	2/1709	2/18253	0.00876164	1
2	GO:0060086	BP	circadian temperature homeostasis	2/1709	2/18253	0.00876164	1
2	GO:0003130	BP	BMP signaling pathway involved in heart induction	2/1709	2/18253	0.00876164	1
2	GO:0044252	BP	negative regulation of multicellular organismal metabolic process	2/1709	2/18253	0.00876164	1
2	GO:0070428	BP	regulation of nucleotide-binding oligomerization domain containing 1 signaling pathway	2/1709	2/18253	0.00876164	1
2	GO:0010658	BP	striated muscle cell apoptotic process	2/1709	2/18253	0.00876164	1
2	GO:0010659	BP	cardiac muscle cell apoptotic process	2/1709	2/18253	0.00876164	1
2	GO:0015917	BP	aminophospholipid transport	2/1709	2/18253	0.00876164	1
2	GO:0006423	BP	cysteinyl-tRNA aminoacylation	2/1709	2/18253	0.00876164	1
2	GO:0070951	BP	regulation of neutrophil mediated killing of gram-negative bacterium	2/1709	2/18253	0.00876164	1
2	GO:0070950	BP	regulation of neutrophil mediated killing of bacterium	2/1709	2/18253	0.00876164	1
2	GO:1903352	BP	L-ornithine transmembrane transport	2/1709	2/18253	0.00876164	1
2	GO:0035583	BP	sequestering of TGFbeta in extracellular matrix	2/1709	2/18253	0.00876164	1
2	GO:0032915	BP	positive regulation of transforming growth factor beta2 production	2/1709	2/18253	0.00876164	1
2	GO:0015822	BP	ornithine transport	2/1709	2/18253	0.00876164	1
2	GO:0002503	BP	peptide antigen assembly with MHC class II protein complex	2/1709	2/18253	0.00876164	1
2	GO:0071663	BP	positive regulation of granzyme B production	2/1709	2/18253	0.00876164	1
2	GO:0071661	BP	regulation of granzyme B production	2/1709	2/18253	0.00876164	1
2	GO:0044333	BP	Wnt signaling pathway involved in digestive tract morphogenesis	2/1709	2/18253	0.00876164	1
2	GO:0005997	BP	xylulose metabolic process	2/1709	2/18253	0.00876164	1
2	GO:0019556	BP	histidine catabolic process to glutamate and formamide	2/1709	2/18253	0.00876164	1
2	GO:0019557	BP	histidine catabolic process to glutamate and formate	2/1709	2/18253	0.00876164	1
2	GO:0030505	BP	inorganic diphosphate transport	2/1709	2/18253	0.00876164	1
2	GO:0002268	BP	follicular dendritic cell differentiation	2/1709	2/18253	0.00876164	1
2	GO:0002266	BP	follicular dendritic cell activation	2/1709	2/18253	0.00876164	1
2	GO:0061723	BP	glycophagy	2/1709	2/18253	0.00876164	1
2	GO:0043606	BP	formamide metabolic process	2/1709	2/18253	0.00876164	1
2	GO:0006601	BP	creatine biosynthetic process	2/1709	2/18253	0.00876164	1
2	GO:0097056	BP	selenocysteinyl-tRNA(Sec) biosynthetic process	2/1709	2/18253	0.00876164	1
2	GO:0060775	BP	planar cell polarity pathway involved in gastrula mediolateral intercalation	2/1709	2/18253	0.00876164	1
2	GO:0070948	BP	regulation of neutrophil mediated cytotoxicity	2/1709	2/18253	0.00876164	1
2	GO:0070949	BP	regulation of neutrophil mediated killing of symbiont cell	2/1709	2/18253	0.00876164	1
2	GO:0032499	BP	detection of peptidoglycan	2/1709	2/18253	0.00876164	1
2	GO:0021891	BP	olfactory bulb interneuron development	2/1709	2/18253	0.00876164	1
2	GO:0070256	BP	negative regulation of mucus secretion	2/1709	2/18253	0.00876164	1
42	GO:2001233	BP	regulation of apoptotic signaling pathway	42/1709	299/18253	0.00882208	1
255	GO:0065008	BP	regulation of biological quality	255/1709	2350/18253	0.00884581	1
34	GO:0051186	BP	cofactor metabolic process	34/1709	233/18253	0.00887199	1
10	GO:0048592	BP	eye morphogenesis	10/1709	46/18253	0.00896034	1
32	GO:0002696	BP	positive regulation of leukocyte activation	32/1709	216/18253	0.00921967	1
48	GO:1903649	BP	regulation of cytoplasmic transport	48/1709	353/18253	0.0094128	1
12	GO:0046683	BP	response to organophosphorus	12/1709	57/18253	0.00942522	1
8	GO:0030890	BP	positive regulation of B cell proliferation	8/1709	33/18253	0.00960256	1
16	GO:0019318	BP	hexose metabolic process	16/1709	89/18253	0.00960867	1
16	GO:0035108	BP	limb morphogenesis	16/1709	89/18253	0.00960867	1
16	GO:0035107	BP	appendage morphogenesis	16/1709	89/18253	0.00960867	1
5	GO:0046885	BP	regulation of hormone biosynthetic process	5/1709	15/18253	0.00965027	1
5	GO:0032732	BP	positive regulation of interleukin-1 production	5/1709	15/18253	0.00965027	1
5	GO:1903409	BP	reactive oxygen species biosynthetic process	5/1709	15/18253	0.00965027	1
5	GO:1902108	BP	regulation of mitochondrial membrane permeability involved in apoptotic process	5/1709	15/18253	0.00965027	1
26	GO:0045765	BP	regulation of angiogenesis	26/1709	165/18253	0.00988194	1
26	GO:0035295	BP	tube development	26/1709	165/18253	0.00988194	1
64	GO:0043408	BP	regulation of MAPK cascade	64/1709	499/18253	0.00990093	1
30	GO:0030111	BP	regulation of Wnt signaling pathway	30/1709	201/18253	0.0100744	1
26	GO:0046822	BP	regulation of nucleocytoplasmic transport	26/1709	166/18253	0.0101055	1
4	GO:0003197	BP	endocardial cushion development	4/1709	10/18253	0.0101351	1
4	GO:0000052	BP	citrulline metabolic process	4/1709	10/18253	0.0101351	1
4	GO:1902686	BP	mitochondrial outer membrane permeabilization involved in programmed cell death	4/1709	10/18253	0.0101351	1
4	GO:1902110	BP	positive regulation of mitochondrial membrane permeability involved in apoptotic process	4/1709	10/18253	0.0101351	1
4	GO:0060394	BP	negative regulation of pathway-restricted SMAD protein phosphorylation	4/1709	10/18253	0.0101351	1
4	GO:0050862	BP	positive regulation of T cell receptor signaling pathway	4/1709	10/18253	0.0101351	1
4	GO:0071850	BP	mitotic cell cycle arrest	4/1709	10/18253	0.0101351	1
4	GO:0006000	BP	fructose metabolic process	4/1709	10/18253	0.0101351	1
4	GO:0039532	BP	negative regulation of viral-induced cytoplasmic pattern recognition receptor signaling pathway	4/1709	10/18253	0.0101351	1
4	GO:0009651	BP	response to salt stress	4/1709	10/18253	0.0101351	1
71	GO:0019637	BP	organophosphate metabolic process	71/1709	566/18253	0.0102396	1
9	GO:0016079	BP	synaptic vesicle exocytosis	9/1709	40/18253	0.0102489	1
9	GO:1902807	BP	negative regulation of cell cycle G1/S phase transition	9/1709	40/18253	0.0102489	1
9	GO:0071622	BP	regulation of granulocyte chemotaxis	9/1709	40/18253	0.0102489	1
28	GO:0032870	BP	cellular response to hormone stimulus	28/1709	184/18253	0.0102847	1
64	GO:0005975	BP	carbohydrate metabolic process	64/1709	502/18253	0.0102873	1
20	GO:0006887	BP	exocytosis	20/1709	119/18253	0.0103058	1
15	GO:0060562	BP	epithelial tube morphogenesis	15/1709	80/18253	0.0103215	1
10	GO:0030888	BP	regulation of B cell proliferation	10/1709	47/18253	0.0104506	1
10	GO:1901863	BP	positive regulation of muscle tissue development	10/1709	47/18253	0.0104506	1
6	GO:0002292	BP	T cell differentiation involved in immune response	6/1709	21/18253	0.0105644	1
6	GO:0032885	BP	regulation of polysaccharide biosynthetic process	6/1709	21/18253	0.0105644	1
6	GO:0060425	BP	lung morphogenesis	6/1709	21/18253	0.0105644	1
6	GO:0008299	BP	isoprenoid biosynthetic process	6/1709	21/18253	0.0105644	1
6	GO:0002828	BP	regulation of type 2 immune response	6/1709	21/18253	0.0105644	1
6	GO:0010803	BP	regulation of tumor necrosis factor-mediated signaling pathway	6/1709	21/18253	0.0105644	1
79	GO:0051345	BP	positive regulation of hydrolase activity	79/1709	641/18253	0.0106055	1
22	GO:0042306	BP	regulation of protein import into nucleus	22/1709	135/18253	0.0106113	1
18	GO:0005996	BP	monosaccharide metabolic process	18/1709	105/18253	0.0107129	1
72	GO:0070201	BP	regulation of establishment of protein localization	72/1709	575/18253	0.0107293	1
20	GO:2000241	BP	regulation of reproductive process	20/1709	120/18253	0.0107688	1
43	GO:0006753	BP	nucleoside phosphate metabolic process	43/1709	314/18253	0.010813	1
62	GO:0030155	BP	regulation of cell adhesion	62/1709	485/18253	0.0113039	1
152	GO:0019438	BP	aromatic compound biosynthetic process	152/1709	1341/18253	0.0113151	1
38	GO:0040007	BP	growth	38/1709	271/18253	0.0113413	1
147	GO:0051174	BP	regulation of phosphorus metabolic process	147/1709	1290/18253	0.0113699	1
24	GO:0030198	BP	extracellular matrix organization	24/1709	153/18253	0.0113815	1
18	GO:0050864	BP	regulation of B cell activation	18/1709	106/18253	0.0113988	1
22	GO:1904589	BP	regulation of protein import	22/1709	137/18253	0.0114891	1
12	GO:0030279	BP	negative regulation of ossification	12/1709	60/18253	0.0115201	1
15	GO:0008406	BP	gonad development	15/1709	82/18253	0.011524	1
1496	GO:0008150	BP	biological_process	1496/1709	15603/18253	0.0115406	1
8	GO:0032757	BP	positive regulation of interleukin-8 production	8/1709	34/18253	0.0115504	1
471	GO:0060255	BP	regulation of macromolecule metabolic process	471/1709	4568/18253	0.0116565	1
24	GO:0043062	BP	extracellular structure organization	24/1709	154/18253	0.0118548	1
20	GO:0007178	BP	transmembrane receptor protein serine/threonine kinase signaling pathway	20/1709	122/18253	0.0119071	1
9	GO:0030514	BP	negative regulation of BMP signaling pathway	9/1709	41/18253	0.0120676	1
9	GO:0001707	BP	mesoderm formation	9/1709	41/18253	0.0120676	1
9	GO:0051057	BP	positive regulation of small GTPase mediated signal transduction	9/1709	41/18253	0.0120676	1
18	GO:0048568	BP	embryonic organ development	18/1709	107/18253	0.0121673	1
18	GO:0032874	BP	positive regulation of stress-activated MAPK cascade	18/1709	107/18253	0.0121673	1
86	GO:0032880	BP	regulation of protein localization	86/1709	708/18253	0.0122303	1
60	GO:0050767	BP	regulation of neurogenesis	60/1709	468/18253	0.0124477	1
12	GO:0051149	BP	positive regulation of muscle cell differentiation	12/1709	61/18253	0.0125114	1
12	GO:0014074	BP	response to purine-containing compound	12/1709	61/18253	0.0125114	1
7	GO:0045684	BP	positive regulation of epidermis development	7/1709	28/18253	0.0127075	1
7	GO:0090022	BP	regulation of neutrophil chemotaxis	7/1709	28/18253	0.0127075	1
7	GO:0045581	BP	negative regulation of T cell differentiation	7/1709	28/18253	0.0127075	1
7	GO:0002832	BP	negative regulation of response to biotic stimulus	7/1709	28/18253	0.0127075	1
5	GO:0015800	BP	acidic amino acid transport	5/1709	16/18253	0.0129723	1
5	GO:0015813	BP	L-glutamate transport	5/1709	16/18253	0.0129723	1
5	GO:0048566	BP	embryonic digestive tract development	5/1709	16/18253	0.0129723	1
5	GO:0072525	BP	pyridine-containing compound biosynthetic process	5/1709	16/18253	0.0129723	1
27	GO:0007507	BP	heart development	27/1709	178/18253	0.0131098	1
3	GO:0034115	BP	negative regulation of heterotypic cell-cell adhesion	3/1709	6/18253	0.0131932	1
3	GO:0060363	BP	cranial suture morphogenesis	3/1709	6/18253	0.0131932	1
3	GO:0070587	BP	regulation of cell-cell adhesion involved in gastrulation	3/1709	6/18253	0.0131932	1
3	GO:0006451	BP	translational readthrough	3/1709	6/18253	0.0131932	1
3	GO:0060684	BP	epithelial-mesenchymal cell signaling	3/1709	6/18253	0.0131932	1
3	GO:0060685	BP	regulation of prostatic bud formation	3/1709	6/18253	0.0131932	1
3	GO:0071281	BP	cellular response to iron ion	3/1709	6/18253	0.0131932	1
3	GO:0001514	BP	selenocysteine incorporation	3/1709	6/18253	0.0131932	1
3	GO:0045602	BP	negative regulation of endothelial cell differentiation	3/1709	6/18253	0.0131932	1
3	GO:0032933	BP	SREBP signaling pathway	3/1709	6/18253	0.0131932	1
3	GO:0046886	BP	positive regulation of hormone biosynthetic process	3/1709	6/18253	0.0131932	1
3	GO:0002579	BP	positive regulation of antigen processing and presentation	3/1709	6/18253	0.0131932	1
3	GO:0034627	BP	'de novo' NAD biosynthetic process	3/1709	6/18253	0.0131932	1
3	GO:0050702	BP	interleukin-1 beta secretion	3/1709	6/18253	0.0131932	1
3	GO:0060754	BP	positive regulation of mast cell chemotaxis	3/1709	6/18253	0.0131932	1
3	GO:0006991	BP	response to sterol depletion	3/1709	6/18253	0.0131932	1
3	GO:0036490	BP	regulation of translation in response to endoplasmic reticulum stress	3/1709	6/18253	0.0131932	1
3	GO:0071501	BP	cellular response to sterol depletion	3/1709	6/18253	0.0131932	1
3	GO:0070257	BP	positive regulation of mucus secretion	3/1709	6/18253	0.0131932	1
6	GO:0045851	BP	pH reduction	6/1709	22/18253	0.0133986	1
6	GO:1903432	BP	regulation of TORC1 signaling	6/1709	22/18253	0.0133986	1
6	GO:0040036	BP	regulation of fibroblast growth factor receptor signaling pathway	6/1709	22/18253	0.0133986	1
6	GO:0046835	BP	carbohydrate phosphorylation	6/1709	22/18253	0.0133986	1
6	GO:0043367	BP	CD4-positive, alpha-beta T cell differentiation	6/1709	22/18253	0.0133986	1
6	GO:1903428	BP	positive regulation of reactive oxygen species biosynthetic process	6/1709	22/18253	0.0133986	1
6	GO:0019319	BP	hexose biosynthetic process	6/1709	22/18253	0.0133986	1
19	GO:0050679	BP	positive regulation of epithelial cell proliferation	19/1709	113/18253	0.0135203	1
8	GO:0002312	BP	B cell activation involved in immune response	8/1709	35/18253	0.0137743	1
8	GO:0006636	BP	unsaturated fatty acid biosynthetic process	8/1709	35/18253	0.0137743	1
8	GO:0051591	BP	response to cAMP	8/1709	35/18253	0.0137743	1
17	GO:0045995	BP	regulation of embryonic development	17/1709	99/18253	0.0138052	1
9	GO:0030512	BP	negative regulation of transforming growth factor beta receptor signaling pathway	9/1709	42/18253	0.0141163	1
9	GO:0045669	BP	positive regulation of osteoblast differentiation	9/1709	42/18253	0.0141163	1
32	GO:0050867	BP	positive regulation of cell activation	32/1709	222/18253	0.0142475	1
11	GO:0071456	BP	cellular response to hypoxia	11/1709	53/18253	0.0144003	1
11	GO:0090596	BP	sensory organ morphogenesis	11/1709	53/18253	0.0144003	1
11	GO:0001704	BP	formation of primary germ layer	11/1709	53/18253	0.0144003	1
43	GO:0006915	BP	apoptotic process	43/1709	317/18253	0.0145144	1
14	GO:0010508	BP	positive regulation of autophagy	14/1709	75/18253	0.0145501	1
14	GO:0030326	BP	embryonic limb morphogenesis	14/1709	75/18253	0.0145501	1
14	GO:0035113	BP	embryonic appendage morphogenesis	14/1709	75/18253	0.0145501	1
23	GO:1903522	BP	regulation of blood circulation	23/1709	147/18253	0.014557	1
4	GO:0003198	BP	epithelial to mesenchymal transition involved in endocardial cushion formation	4/1709	11/18253	0.0147609	1
4	GO:0035794	BP	positive regulation of mitochondrial membrane permeability	4/1709	11/18253	0.0147609	1
4	GO:0040037	BP	negative regulation of fibroblast growth factor receptor signaling pathway	4/1709	11/18253	0.0147609	1
4	GO:0046321	BP	positive regulation of fatty acid oxidation	4/1709	11/18253	0.0147609	1
4	GO:0060272	BP	embryonic skeletal joint morphogenesis	4/1709	11/18253	0.0147609	1
4	GO:0072413	BP	signal transduction involved in mitotic cell cycle checkpoint	4/1709	11/18253	0.0147609	1
4	GO:1902402	BP	signal transduction involved in mitotic DNA damage checkpoint	4/1709	11/18253	0.0147609	1
4	GO:1902403	BP	signal transduction involved in mitotic DNA integrity checkpoint	4/1709	11/18253	0.0147609	1
4	GO:0045717	BP	negative regulation of fatty acid biosynthetic process	4/1709	11/18253	0.0147609	1
4	GO:0089711	BP	L-glutamate transmembrane transport	4/1709	11/18253	0.0147609	1
39	GO:0006325	BP	chromatin organization	39/1709	598/18253	0.0149839	1
14	GO:0032006	BP	regulation of TOR signaling	14/1709	76/18253	0.0152204	1
11	GO:0036294	BP	cellular response to decreased oxygen levels	11/1709	54/18253	0.0152593	1
7	GO:1902229	BP	regulation of intrinsic apoptotic signaling pathway in response to DNA damage	7/1709	29/18253	0.0154295	1
7	GO:0035115	BP	embryonic forelimb morphogenesis	7/1709	29/18253	0.0154295	1
56	GO:0043547	BP	positive regulation of GTPase activity	56/1709	437/18253	0.0156656	1
21	GO:0070374	BP	positive regulation of ERK1 and ERK2 cascade	21/1709	133/18253	0.0159871	1
248	GO:0044765	BP	single-organism transport	248/1709	2308/18253	0.0160066	1
35	GO:0050708	BP	regulation of protein secretion	35/1709	251/18253	0.0160365	1
56	GO:1903530	BP	regulation of secretion by cell	56/1709	439/18253	0.0161031	1
8	GO:0042398	BP	cellular modified amino acid biosynthetic process	8/1709	36/18253	0.0162945	1
8	GO:0044236	BP	multicellular organism metabolic process	8/1709	36/18253	0.0162945	1
8	GO:0046579	BP	positive regulation of Ras protein signal transduction	8/1709	36/18253	0.0162945	1
9	GO:0046889	BP	positive regulation of lipid biosynthetic process	9/1709	43/18253	0.0164107	1
9	GO:1903845	BP	negative regulation of cellular response to transforming growth factor beta stimulus	9/1709	43/18253	0.0164107	1
9	GO:0032722	BP	positive regulation of chemokine production	9/1709	43/18253	0.0164107	1
12	GO:0002702	BP	positive regulation of production of molecular mediator of immune response	12/1709	64/18253	0.0164492	1
473	GO:0031323	BP	regulation of cellular metabolic process	473/1709	4610/18253	0.0164845	1
41	GO:0051249	BP	regulation of lymphocyte activation	41/1709	303/18253	0.0165274	1
50	GO:0045664	BP	regulation of neuron differentiation	50/1709	384/18253	0.0165373	1
6	GO:0010575	BP	positive regulation of vascular endothelial growth factor production	6/1709	23/18253	0.0167237	1
6	GO:2000404	BP	regulation of T cell migration	6/1709	23/18253	0.0167237	1
16	GO:1901861	BP	regulation of muscle tissue development	16/1709	91/18253	0.0168684	1
54	GO:0009888	BP	tissue development	54/1709	418/18253	0.0169673	1
5	GO:0050704	BP	regulation of interleukin-1 secretion	5/1709	17/18253	0.0169879	1
5	GO:2000482	BP	regulation of interleukin-8 secretion	5/1709	17/18253	0.0169879	1
5	GO:0050927	BP	positive regulation of positive chemotaxis	5/1709	17/18253	0.0169879	1
5	GO:0032527	BP	protein exit from endoplasmic reticulum	5/1709	17/18253	0.0169879	1
5	GO:0044275	BP	cellular carbohydrate catabolic process	5/1709	17/18253	0.0169879	1
5	GO:0036003	BP	positive regulation of transcription from RNA polymerase II promoter in response to stress	5/1709	17/18253	0.0169879	1
5	GO:0065005	BP	protein-lipid complex assembly	5/1709	17/18253	0.0169879	1
145	GO:0019220	BP	regulation of phosphate metabolic process	145/1709	1285/18253	0.0170128	1
16	GO:0002831	BP	regulation of response to biotic stimulus	16/1709	92/18253	0.0174144	1
346	GO:0051179	BP	localization	346/1709	3304/18253	0.0174695	1
11	GO:0048660	BP	regulation of smooth muscle cell proliferation	11/1709	56/18253	0.0175893	1
28	GO:0071407	BP	cellular response to organic cyclic compound	28/1709	193/18253	0.017926	1
12	GO:0097479	BP	synaptic vesicle localization	12/1709	65/18253	0.0181053	1
18	GO:0070304	BP	positive regulation of stress-activated protein kinase signaling cascade	18/1709	108/18253	0.0184498	1
131	GO:0051247	BP	positive regulation of protein metabolic process	131/1709	1150/18253	0.0184689	1
7	GO:0048286	BP	lung alveolus development	7/1709	30/18253	0.018541	1
7	GO:0048701	BP	embryonic cranial skeleton morphogenesis	7/1709	30/18253	0.018541	1
7	GO:0051196	BP	regulation of coenzyme metabolic process	7/1709	30/18253	0.018541	1
7	GO:0070527	BP	platelet aggregation	7/1709	30/18253	0.018541	1
9	GO:2000648	BP	positive regulation of stem cell proliferation	9/1709	44/18253	0.0189664	1
9	GO:0006418	BP	tRNA aminoacylation for protein translation	9/1709	44/18253	0.0189664	1
11	GO:0043255	BP	regulation of carbohydrate biosynthetic process	11/1709	57/18253	0.0190725	1
34	GO:0030855	BP	epithelial cell differentiation	34/1709	243/18253	0.0191199	1
34	GO:0010769	BP	regulation of cell morphogenesis involved in differentiation	34/1709	243/18253	0.0191199	1
8	GO:0021782	BP	glial cell development	8/1709	37/18253	0.019131	1
8	GO:1902041	BP	regulation of extrinsic apoptotic signaling pathway via death domain receptors	8/1709	37/18253	0.019131	1
8	GO:0051055	BP	negative regulation of lipid biosynthetic process	8/1709	37/18253	0.019131	1
8	GO:1903146	BP	regulation of mitophagy	8/1709	37/18253	0.019131	1
74	GO:0048878	BP	chemical homeostasis	74/1709	609/18253	0.0193922	1
31	GO:0050678	BP	regulation of epithelial cell proliferation	31/1709	220/18253	0.0195961	1
22	GO:0046883	BP	regulation of hormone secretion	22/1709	143/18253	0.0199109	1
4	GO:2001057	BP	reactive nitrogen species metabolic process	4/1709	12/18253	0.0205269	1
4	GO:0042402	BP	cellular biogenic amine catabolic process	4/1709	12/18253	0.0205269	1
4	GO:0036092	BP	phosphatidylinositol-3-phosphate biosynthetic process	4/1709	12/18253	0.0205269	1
4	GO:2000010	BP	positive regulation of protein localization to cell surface	4/1709	12/18253	0.0205269	1
4	GO:0055098	BP	response to low-density lipoprotein particle	4/1709	12/18253	0.0205269	1
4	GO:0010804	BP	negative regulation of tumor necrosis factor-mediated signaling pathway	4/1709	12/18253	0.0205269	1
4	GO:0009435	BP	NAD biosynthetic process	4/1709	12/18253	0.0205269	1
4	GO:0009310	BP	amine catabolic process	4/1709	12/18253	0.0205269	1
4	GO:0048333	BP	mesodermal cell differentiation	4/1709	12/18253	0.0205269	1
4	GO:1901213	BP	regulation of transcription from RNA polymerase II promoter involved in heart development	4/1709	12/18253	0.0205269	1
4	GO:2000778	BP	positive regulation of interleukin-6 secretion	4/1709	12/18253	0.0205269	1
4	GO:0043555	BP	regulation of translation in response to stress	4/1709	12/18253	0.0205269	1
4	GO:0042487	BP	regulation of odontogenesis of dentin-containing tooth	4/1709	12/18253	0.0205269	1
6	GO:0099601	BP	regulation of neurotransmitter receptor activity	6/1709	24/18253	0.0205755	1
6	GO:0035710	BP	CD4-positive, alpha-beta T cell activation	6/1709	24/18253	0.0205755	1
6	GO:0035116	BP	embryonic hindlimb morphogenesis	6/1709	24/18253	0.0205755	1
6	GO:0045923	BP	positive regulation of fatty acid metabolic process	6/1709	24/18253	0.0205755	1
6	GO:0032963	BP	collagen metabolic process	6/1709	24/18253	0.0205755	1
6	GO:0043470	BP	regulation of carbohydrate catabolic process	6/1709	24/18253	0.0205755	1
6	GO:0043471	BP	regulation of cellular carbohydrate catabolic process	6/1709	24/18253	0.0205755	1
6	GO:0045616	BP	regulation of keratinocyte differentiation	6/1709	24/18253	0.0205755	1
53	GO:0044723	BP	single-organism carbohydrate metabolic process	53/1709	413/18253	0.0205893	1
13	GO:0099531	BP	presynaptic process involved in synaptic transmission	13/1709	70/18253	0.0206017	1
11	GO:0099643	BP	signal release from synapse	11/1709	58/18253	0.0207767	1
16	GO:0001822	BP	kidney development	16/1709	96/18253	0.0209066	1
43	GO:0071900	BP	regulation of protein serine/threonine kinase activity	43/1709	327/18253	0.0213219	1
27	GO:0050878	BP	regulation of body fluid levels	27/1709	185/18253	0.0213392	1
22	GO:0016055	BP	Wnt signaling pathway	22/1709	145/18253	0.0213947	1
13	GO:0017015	BP	regulation of transforming growth factor beta receptor signaling pathway	13/1709	71/18253	0.0214067	1
3	GO:0034380	BP	high-density lipoprotein particle assembly	3/1709	7/18253	0.021494	1
3	GO:0090130	BP	tissue migration	3/1709	7/18253	0.021494	1
3	GO:0071639	BP	positive regulation of monocyte chemotactic protein-1 production	3/1709	7/18253	0.021494	1
3	GO:0051709	BP	regulation of killing of cells of other organism	3/1709	7/18253	0.021494	1
3	GO:1903025	BP	regulation of RNA polymerase II regulatory region sequence-specific DNA binding	3/1709	7/18253	0.021494	1
3	GO:0060346	BP	bone trabecula formation	3/1709	7/18253	0.021494	1
3	GO:0032365	BP	intracellular lipid transport	3/1709	7/18253	0.021494	1
3	GO:0035563	BP	positive regulation of chromatin binding	3/1709	7/18253	0.021494	1
3	GO:0048819	BP	regulation of hair follicle maturation	3/1709	7/18253	0.021494	1
3	GO:0019240	BP	citrulline biosynthetic process	3/1709	7/18253	0.021494	1
3	GO:0055091	BP	phospholipid homeostasis	3/1709	7/18253	0.021494	1
3	GO:1990253	BP	cellular response to leucine starvation	3/1709	7/18253	0.021494	1
3	GO:0014874	BP	response to stimulus involved in regulation of muscle adaptation	3/1709	7/18253	0.021494	1
3	GO:0023058	BP	adaptation of signaling pathway	3/1709	7/18253	0.021494	1
3	GO:0044539	BP	long-chain fatty acid import	3/1709	7/18253	0.021494	1
3	GO:1990440	BP	positive regulation of transcription from RNA polymerase II promoter in response to endoplasmic reticulum stress	3/1709	7/18253	0.021494	1
3	GO:0006207	BP	'de novo' pyrimidine nucleobase biosynthetic process	3/1709	7/18253	0.021494	1
3	GO:0061298	BP	retina vasculature development in camera-type eye	3/1709	7/18253	0.021494	1
3	GO:0072201	BP	negative regulation of mesenchymal cell proliferation	3/1709	7/18253	0.021494	1
3	GO:0039536	BP	negative regulation of RIG-I signaling pathway	3/1709	7/18253	0.021494	1
3	GO:0033280	BP	response to vitamin D	3/1709	7/18253	0.021494	1
3	GO:0072111	BP	cell proliferation involved in kidney development	3/1709	7/18253	0.021494	1
3	GO:0019856	BP	pyrimidine nucleobase biosynthetic process	3/1709	7/18253	0.021494	1
3	GO:0045821	BP	positive regulation of glycolytic process	3/1709	7/18253	0.021494	1
3	GO:0060753	BP	regulation of mast cell chemotaxis	3/1709	7/18253	0.021494	1
3	GO:0021978	BP	telencephalon regionalization	3/1709	7/18253	0.021494	1
32	GO:0048589	BP	developmental growth	32/1709	229/18253	0.0217216	1
5	GO:0002335	BP	mature B cell differentiation	5/1709	18/18253	0.0217483	1
5	GO:2000647	BP	negative regulation of stem cell proliferation	5/1709	18/18253	0.0217483	1
5	GO:0050687	BP	negative regulation of defense response to virus	5/1709	18/18253	0.0217483	1
5	GO:0050926	BP	regulation of positive chemotaxis	5/1709	18/18253	0.0217483	1
5	GO:0060740	BP	prostate gland epithelium morphogenesis	5/1709	18/18253	0.0217483	1
5	GO:1902895	BP	positive regulation of pri-miRNA transcription from RNA polymerase II promoter	5/1709	18/18253	0.0217483	1
5	GO:0043457	BP	regulation of cellular respiration	5/1709	18/18253	0.0217483	1
27	GO:0070372	BP	regulation of ERK1 and ERK2 cascade	27/1709	186/18253	0.021834	1
35	GO:0051098	BP	regulation of binding	35/1709	254/18253	0.0219358	1
10	GO:0072332	BP	intrinsic apoptotic signaling pathway by p53 class mediator	10/1709	49/18253	0.0220241	1
7	GO:0001656	BP	metanephros development	7/1709	31/18253	0.0220672	1
7	GO:0051193	BP	regulation of cofactor metabolic process	7/1709	31/18253	0.0220672	1
7	GO:0030330	BP	DNA damage response, signal transduction by p53 class mediator	7/1709	31/18253	0.0220672	1
16	GO:0051896	BP	regulation of protein kinase B signaling	16/1709	97/18253	0.0221185	1
144	GO:0034654	BP	nucleobase-containing compound biosynthetic process	144/1709	1285/18253	0.0221988	1
35	GO:0072521	BP	purine-containing compound metabolic process	35/1709	255/18253	0.0222718	1
8	GO:2000134	BP	negative regulation of G1/S transition of mitotic cell cycle	8/1709	38/18253	0.0223026	1
41	GO:0009117	BP	nucleotide metabolic process	41/1709	307/18253	0.0223799	1
13	GO:1903844	BP	regulation of cellular response to transforming growth factor beta stimulus	13/1709	72/18253	0.0224039	1
41	GO:0051051	BP	negative regulation of transport	41/1709	309/18253	0.0229436	1
116	GO:0051336	BP	regulation of hydrolase activity	116/1709	1017/18253	0.0231533	1
41	GO:0051259	BP	protein oligomerization	41/1709	310/18253	0.023295	1
10	GO:0051148	BP	negative regulation of muscle cell differentiation	10/1709	50/18253	0.0233409	1
10	GO:0002449	BP	lymphocyte mediated immunity	10/1709	50/18253	0.0233409	1
10	GO:0048771	BP	tissue remodeling	10/1709	50/18253	0.0233409	1
10	GO:0072527	BP	pyrimidine-containing compound metabolic process	10/1709	50/18253	0.0233409	1
2	GO:0009581	BP	detection of external stimulus	2/1709	86/18253	0.0234788	1
38	GO:0022407	BP	regulation of cell-cell adhesion	38/1709	284/18253	0.0235762	1
13	GO:0030509	BP	BMP signaling pathway	13/1709	73/18253	0.0235963	1
18	GO:0031589	BP	cell-substrate adhesion	18/1709	114/18253	0.0236379	1
18	GO:0048872	BP	homeostasis of number of cells	18/1709	114/18253	0.0236379	1
23	GO:0032944	BP	regulation of mononuclear cell proliferation	23/1709	153/18253	0.0243259	1
2	GO:0060167	BP	regulation of adenosine receptor signaling pathway	2/1709	3/18253	0.024646	1
2	GO:0090427	BP	activation of meiosis	2/1709	3/18253	0.024646	1
2	GO:0006971	BP	hypotonic response	2/1709	3/18253	0.024646	1
2	GO:1902255	BP	positive regulation of intrinsic apoptotic signaling pathway by p53 class mediator	2/1709	3/18253	0.024646	1
2	GO:0007228	BP	positive regulation of hh target transcription factor activity	2/1709	3/18253	0.024646	1
2	GO:2000660	BP	negative regulation of interleukin-1-mediated signaling pathway	2/1709	3/18253	0.024646	1
2	GO:1990416	BP	cellular response to brain-derived neurotrophic factor stimulus	2/1709	3/18253	0.024646	1
2	GO:0034137	BP	positive regulation of toll-like receptor 2 signaling pathway	2/1709	3/18253	0.024646	1
2	GO:0070779	BP	D-aspartate import	2/1709	3/18253	0.024646	1
2	GO:0097411	BP	hypoxia-inducible factor-1alpha signaling pathway	2/1709	3/18253	0.024646	1
2	GO:0007494	BP	midgut development	2/1709	3/18253	0.024646	1
2	GO:0072199	BP	regulation of mesenchymal cell proliferation involved in ureter development	2/1709	3/18253	0.024646	1
2	GO:0042866	BP	pyruvate biosynthetic process	2/1709	3/18253	0.024646	1
2	GO:0035795	BP	negative regulation of mitochondrial membrane permeability	2/1709	3/18253	0.024646	1
2	GO:2001245	BP	regulation of phosphatidylcholine biosynthetic process	2/1709	3/18253	0.024646	1
2	GO:0072189	BP	ureter development	2/1709	3/18253	0.024646	1
2	GO:0071476	BP	cellular hypotonic response	2/1709	3/18253	0.024646	1
2	GO:2000564	BP	regulation of CD8-positive, alpha-beta T cell proliferation	2/1709	3/18253	0.024646	1
2	GO:0042732	BP	D-xylose metabolic process	2/1709	3/18253	0.024646	1
2	GO:0031077	BP	post-embryonic camera-type eye development	2/1709	3/18253	0.024646	1
2	GO:0061073	BP	ciliary body morphogenesis	2/1709	3/18253	0.024646	1
2	GO:0008291	BP	acetylcholine metabolic process	2/1709	3/18253	0.024646	1
2	GO:0097029	BP	mature conventional dendritic cell differentiation	2/1709	3/18253	0.024646	1
2	GO:0070425	BP	negative regulation of nucleotide-binding oligomerization domain containing signaling pathway	2/1709	3/18253	0.024646	1
2	GO:0019344	BP	cysteine biosynthetic process	2/1709	3/18253	0.024646	1
2	GO:0035880	BP	embryonic nail plate morphogenesis	2/1709	3/18253	0.024646	1
2	GO:0061209	BP	cell proliferation involved in mesonephros development	2/1709	3/18253	0.024646	1
2	GO:2000427	BP	positive regulation of apoptotic cell clearance	2/1709	3/18253	0.024646	1
2	GO:0002248	BP	connective tissue replacement involved in inflammatory response wound healing	2/1709	3/18253	0.024646	1
2	GO:0045415	BP	negative regulation of interleukin-8 biosynthetic process	2/1709	3/18253	0.024646	1
2	GO:0070859	BP	positive regulation of bile acid biosynthetic process	2/1709	3/18253	0.024646	1
2	GO:0033687	BP	osteoblast proliferation	2/1709	3/18253	0.024646	1
2	GO:0003418	BP	growth plate cartilage chondrocyte differentiation	2/1709	3/18253	0.024646	1
2	GO:0070092	BP	regulation of glucagon secretion	2/1709	3/18253	0.024646	1
2	GO:0036465	BP	synaptic vesicle recycling	2/1709	3/18253	0.024646	1
2	GO:2001187	BP	positive regulation of CD8-positive, alpha-beta T cell activation	2/1709	3/18253	0.024646	1
2	GO:0034140	BP	negative regulation of toll-like receptor 3 signaling pathway	2/1709	3/18253	0.024646	1
2	GO:0051884	BP	regulation of anagen	2/1709	3/18253	0.024646	1
2	GO:1902022	BP	L-lysine transport	2/1709	3/18253	0.024646	1
2	GO:0015819	BP	lysine transport	2/1709	3/18253	0.024646	1
2	GO:1900619	BP	acetate ester metabolic process	2/1709	3/18253	0.024646	1
2	GO:0060197	BP	cloacal septation	2/1709	3/18253	0.024646	1
2	GO:0002501	BP	peptide antigen assembly with MHC protein complex	2/1709	3/18253	0.024646	1
2	GO:0006710	BP	androgen catabolic process	2/1709	3/18253	0.024646	1
2	GO:0032763	BP	regulation of mast cell cytokine production	2/1709	3/18253	0.024646	1
2	GO:0006772	BP	thiamine metabolic process	2/1709	3/18253	0.024646	1
2	GO:0070777	BP	D-aspartate transport	2/1709	3/18253	0.024646	1
2	GO:0034354	BP	'de novo' NAD biosynthetic process from tryptophan	2/1709	3/18253	0.024646	1
2	GO:0042723	BP	thiamine-containing compound metabolic process	2/1709	3/18253	0.024646	1
2	GO:0045719	BP	negative regulation of glycogen biosynthetic process	2/1709	3/18253	0.024646	1
2	GO:0006567	BP	threonine catabolic process	2/1709	3/18253	0.024646	1
2	GO:1903401	BP	L-lysine transmembrane transport	2/1709	3/18253	0.024646	1
2	GO:0070433	BP	negative regulation of nucleotide-binding oligomerization domain containing 2 signaling pathway	2/1709	3/18253	0.024646	1
2	GO:0061181	BP	regulation of chondrocyte development	2/1709	3/18253	0.024646	1
2	GO:0003419	BP	growth plate cartilage chondrocyte proliferation	2/1709	3/18253	0.024646	1
2	GO:0006600	BP	creatine metabolic process	2/1709	3/18253	0.024646	1
2	GO:0072138	BP	mesenchymal cell proliferation involved in ureteric bud development	2/1709	3/18253	0.024646	1
2	GO:0014049	BP	positive regulation of glutamate secretion	2/1709	3/18253	0.024646	1
2	GO:0045213	BP	neurotransmitter receptor metabolic process	2/1709	3/18253	0.024646	1
2	GO:0003402	BP	planar cell polarity pathway involved in axis elongation	2/1709	3/18253	0.024646	1
2	GO:0036491	BP	regulation of translation initiation in response to endoplasmic reticulum stress	2/1709	3/18253	0.024646	1
2	GO:0009223	BP	pyrimidine deoxyribonucleotide catabolic process	2/1709	3/18253	0.024646	1
2	GO:1904253	BP	positive regulation of bile acid metabolic process	2/1709	3/18253	0.024646	1
2	GO:0090116	BP	C-5 methylation of cytosine	2/1709	3/18253	0.024646	1
11	GO:0071453	BP	cellular response to oxygen levels	11/1709	60/18253	0.0248756	1
11	GO:0006006	BP	glucose metabolic process	11/1709	60/18253	0.0248756	1
15	GO:0016202	BP	regulation of striated muscle tissue development	15/1709	88/18253	0.024925	1
23	GO:0045732	BP	positive regulation of protein catabolic process	23/1709	154/18253	0.0249582	1
6	GO:0044259	BP	multicellular organismal macromolecule metabolic process	6/1709	25/18253	0.0249864	1
6	GO:0097028	BP	dendritic cell differentiation	6/1709	25/18253	0.0249864	1
6	GO:0042771	BP	intrinsic apoptotic signaling pathway in response to DNA damage by p53 class mediator	6/1709	25/18253	0.0249864	1
13	GO:0072593	BP	reactive oxygen species metabolic process	13/1709	74/18253	0.0249872	1
79	GO:1902533	BP	positive regulation of intracellular signal transduction	79/1709	664/18253	0.0250621	1
19	GO:0008016	BP	regulation of heart contraction	19/1709	119/18253	0.0251528	1
71	GO:0043549	BP	regulation of kinase activity	71/1709	587/18253	0.0252931	1
347	GO:0006807	BP	nitrogen compound metabolic process	347/1709	3337/18253	0.0253622	1
42	GO:0045321	BP	leukocyte activation	42/1709	320/18253	0.0254221	1
19	GO:0006575	BP	cellular modified amino acid metabolic process	19/1709	120/18253	0.0257279	1
7	GO:0050663	BP	cytokine secretion	7/1709	32/18253	0.0260313	1
7	GO:1902622	BP	regulation of neutrophil migration	7/1709	32/18253	0.0260313	1
7	GO:0046326	BP	positive regulation of glucose import	7/1709	32/18253	0.0260313	1
7	GO:2000401	BP	regulation of lymphocyte migration	7/1709	32/18253	0.0260313	1
7	GO:0034605	BP	cellular response to heat	7/1709	32/18253	0.0260313	1
260	GO:0032501	BP	multicellular organismal process	260/1709	3128/18253	0.0260861	1
28	GO:0045666	BP	positive regulation of neuron differentiation	28/1709	198/18253	0.0264985	1
10	GO:0001776	BP	leukocyte homeostasis	10/1709	52/18253	0.0268492	1
10	GO:0014013	BP	regulation of gliogenesis	10/1709	52/18253	0.0268492	1
95	GO:0044248	BP	cellular catabolic process	95/1709	818/18253	0.0269199	1
5	GO:0045939	BP	negative regulation of steroid metabolic process	5/1709	19/18253	0.027297	1
5	GO:0045940	BP	positive regulation of steroid metabolic process	5/1709	19/18253	0.027297	1
5	GO:0042267	BP	natural killer cell mediated cytotoxicity	5/1709	19/18253	0.027297	1
5	GO:0010894	BP	negative regulation of steroid biosynthetic process	5/1709	19/18253	0.027297	1
5	GO:0031018	BP	endocrine pancreas development	5/1709	19/18253	0.027297	1
5	GO:0002228	BP	natural killer cell mediated immunity	5/1709	19/18253	0.027297	1
5	GO:0006544	BP	glycine metabolic process	5/1709	19/18253	0.027297	1
5	GO:0051797	BP	regulation of hair follicle development	5/1709	19/18253	0.027297	1
5	GO:0060716	BP	labyrinthine layer blood vessel development	5/1709	19/18253	0.027297	1
5	GO:1904407	BP	positive regulation of nitric oxide metabolic process	5/1709	19/18253	0.027297	1
5	GO:0045429	BP	positive regulation of nitric oxide biosynthetic process	5/1709	19/18253	0.027297	1
4	GO:0036158	BP	outer dynein arm assembly	4/1709	13/18253	0.0274963	1
4	GO:0071637	BP	regulation of monocyte chemotactic protein-1 production	4/1709	13/18253	0.0274963	1
4	GO:0072422	BP	signal transduction involved in DNA damage checkpoint	4/1709	13/18253	0.0274963	1
4	GO:0072395	BP	signal transduction involved in cell cycle checkpoint	4/1709	13/18253	0.0274963	1
4	GO:0072401	BP	signal transduction involved in DNA integrity checkpoint	4/1709	13/18253	0.0274963	1
4	GO:0002070	BP	epithelial cell maturation	4/1709	13/18253	0.0274963	1
4	GO:0050930	BP	induction of positive chemotaxis	4/1709	13/18253	0.0274963	1
4	GO:0030325	BP	adrenal gland development	4/1709	13/18253	0.0274963	1
4	GO:0034377	BP	plasma lipoprotein particle assembly	4/1709	13/18253	0.0274963	1
4	GO:0007035	BP	vacuolar acidification	4/1709	13/18253	0.0274963	1
4	GO:0000097	BP	sulfur amino acid biosynthetic process	4/1709	13/18253	0.0274963	1
4	GO:0045603	BP	positive regulation of endothelial cell differentiation	4/1709	13/18253	0.0274963	1
4	GO:0032332	BP	positive regulation of chondrocyte differentiation	4/1709	13/18253	0.0274963	1
4	GO:0009071	BP	serine family amino acid catabolic process	4/1709	13/18253	0.0274963	1
4	GO:0010893	BP	positive regulation of steroid biosynthetic process	4/1709	13/18253	0.0274963	1
46	GO:0031347	BP	regulation of defense response	46/1709	359/18253	0.0277922	1
34	GO:0050769	BP	positive regulation of neurogenesis	34/1709	250/18253	0.0279414	1
31	GO:0048638	BP	regulation of developmental growth	31/1709	225/18253	0.0280481	1
21	GO:0009952	BP	anterior/posterior pattern specification	21/1709	140/18253	0.0280729	1
26	GO:0010506	BP	regulation of autophagy	26/1709	181/18253	0.0281329	1
13	GO:0050871	BP	positive regulation of B cell activation	13/1709	76/18253	0.0283789	1
15	GO:0048634	BP	regulation of muscle organ development	15/1709	91/18253	0.0283857	1
149	GO:0031399	BP	regulation of protein modification process	149/1709	1346/18253	0.0285879	1
1	GO:0032204	BP	regulation of telomere maintenance	1/1709	64/18253	0.0285991	1
17	GO:0043433	BP	negative regulation of sequence-specific DNA binding transcription factor activity	17/1709	107/18253	0.0287666	1
17	GO:0044262	BP	cellular carbohydrate metabolic process	17/1709	107/18253	0.0287666	1
10	GO:0008630	BP	intrinsic apoptotic signaling pathway in response to DNA damage	10/1709	53/18253	0.0290523	1
31	GO:1903533	BP	regulation of protein targeting	31/1709	227/18253	0.0293739	1
8	GO:0051445	BP	regulation of meiotic cell cycle	8/1709	40/18253	0.029722	1
15	GO:0046330	BP	positive regulation of JNK cascade	15/1709	92/18253	0.0298919	1
6	GO:0071320	BP	cellular response to cAMP	6/1709	26/18253	0.029985	1
32	GO:0006954	BP	inflammatory response	32/1709	232/18253	0.0301259	1
47	GO:0001775	BP	cell activation	47/1709	370/18253	0.0302093	1
44	GO:0010720	BP	positive regulation of cell development	44/1709	341/18253	0.0302777	1
26	GO:0030182	BP	neuron differentiation	26/1709	184/18253	0.0304178	1
7	GO:0045620	BP	negative regulation of lymphocyte differentiation	7/1709	33/18253	0.0304544	1
32	GO:0034097	BP	response to cytokine	32/1709	233/18253	0.0304779	1
29	GO:0043405	BP	regulation of MAP kinase activity	29/1709	209/18253	0.0308229	1
38	GO:0033157	BP	regulation of intracellular protein transport	38/1709	287/18253	0.0311523	1
22	GO:0048534	BP	hematopoietic or lymphoid organ development	22/1709	147/18253	0.0312426	1
22	GO:0007009	BP	plasma membrane organization	22/1709	147/18253	0.0312426	1
17	GO:0002819	BP	regulation of adaptive immune response	17/1709	109/18253	0.0314761	1
15	GO:0097164	BP	ammonium ion metabolic process	15/1709	93/18253	0.0315784	1
15	GO:0043401	BP	steroid hormone mediated signaling pathway	15/1709	93/18253	0.0315784	1
15	GO:0030217	BP	T cell differentiation	15/1709	93/18253	0.0315784	1
122	GO:0009056	BP	catabolic process	122/1709	1087/18253	0.0317721	1
24	GO:1901293	BP	nucleoside phosphate biosynthetic process	24/1709	167/18253	0.0320194	1
3	GO:0010715	BP	regulation of extracellular matrix disassembly	3/1709	8/18253	0.0320285	1
3	GO:0051955	BP	regulation of amino acid transport	3/1709	8/18253	0.0320285	1
3	GO:0034139	BP	regulation of toll-like receptor 3 signaling pathway	3/1709	8/18253	0.0320285	1
3	GO:1902373	BP	negative regulation of mRNA catabolic process	3/1709	8/18253	0.0320285	1
3	GO:0051930	BP	regulation of sensory perception of pain	3/1709	8/18253	0.0320285	1
3	GO:0051931	BP	regulation of sensory perception	3/1709	8/18253	0.0320285	1
3	GO:0009113	BP	purine nucleobase biosynthetic process	3/1709	8/18253	0.0320285	1
3	GO:0032509	BP	endosome transport via multivesicular body sorting pathway	3/1709	8/18253	0.0320285	1
3	GO:0018410	BP	C-terminal protein amino acid modification	3/1709	8/18253	0.0320285	1
3	GO:0071285	BP	cellular response to lithium ion	3/1709	8/18253	0.0320285	1
3	GO:0009437	BP	carnitine metabolic process	3/1709	8/18253	0.0320285	1
3	GO:0014819	BP	regulation of skeletal muscle contraction	3/1709	8/18253	0.0320285	1
3	GO:2000345	BP	regulation of hepatocyte proliferation	3/1709	8/18253	0.0320285	1
3	GO:0051197	BP	positive regulation of coenzyme metabolic process	3/1709	8/18253	0.0320285	1
3	GO:0051194	BP	positive regulation of cofactor metabolic process	3/1709	8/18253	0.0320285	1
3	GO:0010226	BP	response to lithium ion	3/1709	8/18253	0.0320285	1
3	GO:0043558	BP	regulation of translational initiation in response to stress	3/1709	8/18253	0.0320285	1
3	GO:0050701	BP	interleukin-1 secretion	3/1709	8/18253	0.0320285	1
5	GO:0006605	BP	protein targeting	5/1709	129/18253	0.0320704	1
20	GO:0051480	BP	regulation of cytosolic calcium ion concentration	20/1709	131/18253	0.0330821	1
107	GO:0060341	BP	regulation of cellular localization	107/1709	942/18253	0.0335301	1
5	GO:0006110	BP	regulation of glycolytic process	5/1709	20/18253	0.0336684	1
5	GO:0032890	BP	regulation of organic acid transport	5/1709	20/18253	0.0336684	1
5	GO:0006094	BP	gluconeogenesis	5/1709	20/18253	0.0336684	1
5	GO:0060444	BP	branching involved in mammary gland duct morphogenesis	5/1709	20/18253	0.0336684	1
5	GO:0031128	BP	developmental induction	5/1709	20/18253	0.0336684	1
9	GO:0061572	BP	actin filament bundle organization	9/1709	45/18253	0.0337204	1
33	GO:0002521	BP	leukocyte differentiation	33/1709	243/18253	0.0341395	1
10	GO:0060393	BP	regulation of pathway-restricted SMAD protein phosphorylation	10/1709	55/18253	0.0343865	1
20	GO:0002699	BP	positive regulation of immune effector process	20/1709	133/18253	0.0346505	1
30	GO:0006163	BP	purine nucleotide metabolic process	30/1709	219/18253	0.0347001	1
53	GO:0050801	BP	ion homeostasis	53/1709	426/18253	0.0348226	1
25	GO:0046128	BP	purine ribonucleoside metabolic process	25/1709	174/18253	0.0349113	1
65	GO:0051960	BP	regulation of nervous system development	65/1709	538/18253	0.0349866	1
295	GO:0006810	BP	transport	295/1709	2826/18253	0.0350475	1
65	GO:1901135	BP	carbohydrate derivative metabolic process	65/1709	539/18253	0.0351919	1
7	GO:0045668	BP	negative regulation of osteoblast differentiation	7/1709	34/18253	0.0353554	1
7	GO:0003073	BP	regulation of systemic arterial blood pressure	7/1709	34/18253	0.0353554	1
7	GO:2000677	BP	regulation of transcription regulatory region DNA binding	7/1709	34/18253	0.0353554	1
7	GO:0006956	BP	complement activation	7/1709	34/18253	0.0353554	1
14	GO:0001503	BP	ossification	14/1709	84/18253	0.0355625	1
14	GO:0030177	BP	positive regulation of Wnt signaling pathway	14/1709	84/18253	0.0355625	1
22	GO:0050670	BP	regulation of lymphocyte proliferation	22/1709	152/18253	0.0355723	1
6	GO:0046364	BP	monosaccharide biosynthetic process	6/1709	27/18253	0.0355954	1
6	GO:0055025	BP	positive regulation of cardiac muscle tissue development	6/1709	27/18253	0.0355954	1
6	GO:0002711	BP	positive regulation of T cell mediated immunity	6/1709	27/18253	0.0355954	1
36	GO:0046649	BP	lymphocyte activation	36/1709	273/18253	0.0356125	1
4	GO:0019359	BP	nicotinamide nucleotide biosynthetic process	4/1709	14/18253	0.0357096	1
4	GO:0001759	BP	organ induction	4/1709	14/18253	0.0357096	1
4	GO:1900745	BP	positive regulation of p38MAPK cascade	4/1709	14/18253	0.0357096	1
4	GO:0032731	BP	positive regulation of interleukin-1 beta production	4/1709	14/18253	0.0357096	1
4	GO:0007205	BP	protein kinase C-activating G-protein coupled receptor signaling pathway	4/1709	14/18253	0.0357096	1
4	GO:0009084	BP	glutamine family amino acid biosynthetic process	4/1709	14/18253	0.0357096	1
4	GO:0019363	BP	pyridine nucleotide biosynthetic process	4/1709	14/18253	0.0357096	1
4	GO:0001914	BP	regulation of T cell mediated cytotoxicity	4/1709	14/18253	0.0357096	1
4	GO:0060338	BP	regulation of type I interferon-mediated signaling pathway	4/1709	14/18253	0.0357096	1
4	GO:0045683	BP	negative regulation of epidermis development	4/1709	14/18253	0.0357096	1
4	GO:0036065	BP	fucosylation	4/1709	14/18253	0.0357096	1
4	GO:0039531	BP	regulation of viral-induced cytoplasmic pattern recognition receptor signaling pathway	4/1709	14/18253	0.0357096	1
4	GO:0034114	BP	regulation of heterotypic cell-cell adhesion	4/1709	14/18253	0.0357096	1
9	GO:0043039	BP	tRNA aminoacylation	9/1709	46/18253	0.0357242	1
9	GO:0045844	BP	positive regulation of striated muscle tissue development	9/1709	46/18253	0.0357242	1
9	GO:0051155	BP	positive regulation of striated muscle cell differentiation	9/1709	46/18253	0.0357242	1
9	GO:0048636	BP	positive regulation of muscle organ development	9/1709	46/18253	0.0357242	1
9	GO:0008286	BP	insulin receptor signaling pathway	9/1709	46/18253	0.0357242	1
9	GO:0055024	BP	regulation of cardiac muscle tissue development	9/1709	46/18253	0.0357242	1
10	GO:0008380	BP	RNA splicing	10/1709	197/18253	0.0360355	1
25	GO:0051961	BP	negative regulation of nervous system development	25/1709	177/18253	0.0369378	1
25	GO:0042278	BP	purine nucleoside metabolic process	25/1709	177/18253	0.0369378	1
16	GO:0035148	BP	tube formation	16/1709	101/18253	0.03725	1
16	GO:0030522	BP	intracellular receptor signaling pathway	16/1709	101/18253	0.03725	1
18	GO:0048545	BP	response to steroid hormone	18/1709	118/18253	0.0374601	1
58	GO:0031400	BP	negative regulation of protein modification process	58/1709	475/18253	0.0375102	1
10	GO:0046823	BP	negative regulation of nucleocytoplasmic transport	10/1709	56/18253	0.0375295	1
23	GO:0070663	BP	regulation of leukocyte proliferation	23/1709	158/18253	0.0379194	1
306	GO:2000112	BP	regulation of cellular macromolecule biosynthetic process	306/1709	2943/18253	0.0381323	1
9	GO:0030858	BP	positive regulation of epithelial cell differentiation	9/1709	47/18253	0.0381374	1
9	GO:0043038	BP	amino acid activation	9/1709	47/18253	0.0381374	1
9	GO:0017156	BP	calcium ion regulated exocytosis	9/1709	47/18253	0.0381374	1
9	GO:0002460	BP	adaptive immune response based on somatic recombination of immune receptors built from immunoglobulin superfamily domains	9/1709	47/18253	0.0381374	1
9	GO:0042180	BP	cellular ketone metabolic process	9/1709	47/18253	0.0381374	1
16	GO:0002822	BP	regulation of adaptive immune response based on somatic recombination of immune receptors built from immunoglobulin superfamily domains	16/1709	102/18253	0.038609	1
18	GO:0035023	BP	regulation of Rho protein signal transduction	18/1709	119/18253	0.0387793	1
12	GO:0050673	BP	epithelial cell proliferation	12/1709	71/18253	0.0388927	1
23	GO:0048732	BP	gland development	23/1709	160/18253	0.0393198	1
51	GO:0022604	BP	regulation of cell morphogenesis	51/1709	412/18253	0.0396074	1
277	GO:0006355	BP	regulation of transcription, DNA-templated	277/1709	2648/18253	0.0396785	1
72	GO:0048870	BP	cell motility	72/1709	609/18253	0.0398454	1
37	GO:0044057	BP	regulation of system process	37/1709	285/18253	0.0399649	1
16	GO:0007204	BP	positive regulation of cytosolic calcium ion concentration	16/1709	103/18253	0.0401613	1
7	GO:0001910	BP	regulation of leukocyte mediated cytotoxicity	7/1709	35/18253	0.0407507	1
7	GO:0035136	BP	forelimb morphogenesis	7/1709	35/18253	0.0407507	1
7	GO:0001658	BP	branching involved in ureteric bud morphogenesis	7/1709	35/18253	0.0407507	1
7	GO:0002833	BP	positive regulation of response to biotic stimulus	7/1709	35/18253	0.0407507	1
5	GO:0033865	BP	nucleoside bisphosphate metabolic process	5/1709	21/18253	0.0408884	1
5	GO:1903513	BP	endoplasmic reticulum to cytosol transport	5/1709	21/18253	0.0408884	1
5	GO:0030811	BP	regulation of nucleotide catabolic process	5/1709	21/18253	0.0408884	1
5	GO:0033875	BP	ribonucleoside bisphosphate metabolic process	5/1709	21/18253	0.0408884	1
5	GO:0061037	BP	negative regulation of cartilage development	5/1709	21/18253	0.0408884	1
5	GO:0050886	BP	endocrine process	5/1709	21/18253	0.0408884	1
5	GO:0060976	BP	coronary vasculature development	5/1709	21/18253	0.0408884	1
5	GO:0001990	BP	regulation of systemic arterial blood pressure by hormone	5/1709	21/18253	0.0408884	1
5	GO:0030316	BP	osteoclast differentiation	5/1709	21/18253	0.0408884	1
5	GO:0034032	BP	purine nucleoside bisphosphate metabolic process	5/1709	21/18253	0.0408884	1
5	GO:1902230	BP	negative regulation of intrinsic apoptotic signaling pathway in response to DNA damage	5/1709	21/18253	0.0408884	1
9	GO:0006641	BP	triglyceride metabolic process	9/1709	48/18253	0.0409632	1
9	GO:0042308	BP	negative regulation of protein import into nucleus	9/1709	48/18253	0.0409632	1
9	GO:2001021	BP	negative regulation of response to DNA damage stimulus	9/1709	48/18253	0.0409632	1
9	GO:1904590	BP	negative regulation of protein import	9/1709	48/18253	0.0409632	1
23	GO:0050768	BP	negative regulation of neurogenesis	23/1709	162/18253	0.0412272	1
31	GO:0002697	BP	regulation of immune effector process	31/1709	233/18253	0.0416245	1
6	GO:0003179	BP	heart valve morphogenesis	6/1709	28/18253	0.0418376	1
6	GO:0060674	BP	placenta blood vessel development	6/1709	28/18253	0.0418376	1
6	GO:2000272	BP	negative regulation of receptor activity	6/1709	28/18253	0.0418376	1
18	GO:0010770	BP	positive regulation of cell morphogenesis involved in differentiation	18/1709	121/18253	0.0419156	1
274	GO:0046483	BP	heterocycle metabolic process	274/1709	2622/18253	0.0424335	1
1	GO:0070124	BP	mitochondrial translational initiation	1/1709	61/18253	0.0428506	1
1	GO:0070125	BP	mitochondrial translational elongation	1/1709	61/18253	0.0428506	1
94	GO:0044092	BP	negative regulation of molecular function	94/1709	822/18253	0.0429069	1
29	GO:0010721	BP	negative regulation of cell development	29/1709	213/18253	0.0430185	1
79	GO:0001934	BP	positive regulation of protein phosphorylation	79/1709	678/18253	0.0434979	1
21	GO:0071363	BP	cellular response to growth factor stimulus	21/1709	145/18253	0.0435281	1
19	GO:2001235	BP	positive regulation of apoptotic signaling pathway	19/1709	126/18253	0.0437504	1
9	GO:2000242	BP	negative regulation of reproductive process	9/1709	49/18253	0.0442044	1
9	GO:0001938	BP	positive regulation of endothelial cell proliferation	9/1709	49/18253	0.0442044	1
9	GO:0043648	BP	dicarboxylic acid metabolic process	9/1709	49/18253	0.0442044	1
12	GO:0050715	BP	positive regulation of cytokine secretion	12/1709	73/18253	0.0442385	1
12	GO:0006906	BP	vesicle fusion	12/1709	73/18253	0.0442385	1
12	GO:0007160	BP	cell-matrix adhesion	12/1709	73/18253	0.0442385	1
11	GO:0008584	BP	male gonad development	11/1709	62/18253	0.0442781	1
38	GO:0051962	BP	positive regulation of nervous system development	38/1709	297/18253	0.04452	1
3	GO:0031102	BP	neuron projection regeneration	3/1709	9/18253	0.0447612	1
3	GO:0036159	BP	inner dynein arm assembly	3/1709	9/18253	0.0447612	1
3	GO:2000310	BP	regulation of N-methyl-D-aspartate selective glutamate receptor activity	3/1709	9/18253	0.0447612	1
3	GO:0030813	BP	positive regulation of nucleotide catabolic process	3/1709	9/18253	0.0447612	1
3	GO:0031953	BP	negative regulation of protein autophosphorylation	3/1709	9/18253	0.0447612	1
3	GO:0010566	BP	regulation of ketone biosynthetic process	3/1709	9/18253	0.0447612	1
3	GO:0007175	BP	negative regulation of epidermal growth factor-activated receptor activity	3/1709	9/18253	0.0447612	1
3	GO:0043616	BP	keratinocyte proliferation	3/1709	9/18253	0.0447612	1
3	GO:0051386	BP	regulation of neurotrophin TRK receptor signaling pathway	3/1709	9/18253	0.0447612	1
3	GO:0045414	BP	regulation of interleukin-8 biosynthetic process	3/1709	9/18253	0.0447612	1
3	GO:0032486	BP	Rap protein signal transduction	3/1709	9/18253	0.0447612	1
3	GO:0032352	BP	positive regulation of hormone metabolic process	3/1709	9/18253	0.0447612	1
3	GO:0070857	BP	regulation of bile acid biosynthetic process	3/1709	9/18253	0.0447612	1
3	GO:0060972	BP	left/right pattern formation	3/1709	9/18253	0.0447612	1
3	GO:1902369	BP	negative regulation of RNA catabolic process	3/1709	9/18253	0.0447612	1
3	GO:0061299	BP	retina vasculature morphogenesis in camera-type eye	3/1709	9/18253	0.0447612	1
3	GO:0071404	BP	cellular response to low-density lipoprotein particle stimulus	3/1709	9/18253	0.0447612	1
3	GO:0060442	BP	branching involved in prostate gland morphogenesis	3/1709	9/18253	0.0447612	1
3	GO:0006560	BP	proline metabolic process	3/1709	9/18253	0.0447612	1
3	GO:0070189	BP	kynurenine metabolic process	3/1709	9/18253	0.0447612	1
3	GO:0032060	BP	bleb assembly	3/1709	9/18253	0.0447612	1
3	GO:0060033	BP	anatomical structure regression	3/1709	9/18253	0.0447612	1
3	GO:0014829	BP	vascular smooth muscle contraction	3/1709	9/18253	0.0447612	1
3	GO:0032490	BP	detection of molecule of bacterial origin	3/1709	9/18253	0.0447612	1
3	GO:0033327	BP	Leydig cell differentiation	3/1709	9/18253	0.0447612	1
95	GO:0022414	BP	reproductive process	95/1709	836/18253	0.044849	1
14	GO:0019882	BP	antigen processing and presentation	14/1709	89/18253	0.0448512	1
26	GO:0009119	BP	ribonucleoside metabolic process	26/1709	190/18253	0.0449302	1
4	GO:0048557	BP	embryonic digestive tract morphogenesis	4/1709	15/18253	0.0451857	1
4	GO:0045655	BP	regulation of monocyte differentiation	4/1709	15/18253	0.0451857	1
4	GO:0019400	BP	alditol metabolic process	4/1709	15/18253	0.0451857	1
4	GO:0046639	BP	negative regulation of alpha-beta T cell differentiation	4/1709	15/18253	0.0451857	1
4	GO:0038179	BP	neurotrophin signaling pathway	4/1709	15/18253	0.0451857	1
4	GO:0030539	BP	male genitalia development	4/1709	15/18253	0.0451857	1
4	GO:0010463	BP	mesenchymal cell proliferation	4/1709	15/18253	0.0451857	1
4	GO:0055094	BP	response to lipoprotein particle	4/1709	15/18253	0.0451857	1
4	GO:2000050	BP	regulation of non-canonical Wnt signaling pathway	4/1709	15/18253	0.0451857	1
4	GO:0035561	BP	regulation of chromatin binding	4/1709	15/18253	0.0451857	1
4	GO:0072080	BP	nephron tubule development	4/1709	15/18253	0.0451857	1
4	GO:0098801	BP	regulation of renal system process	4/1709	15/18253	0.0451857	1
4	GO:0001516	BP	prostaglandin biosynthetic process	4/1709	15/18253	0.0451857	1
4	GO:1902043	BP	positive regulation of extrinsic apoptotic signaling pathway via death domain receptors	4/1709	15/18253	0.0451857	1
4	GO:2000678	BP	negative regulation of transcription regulatory region DNA binding	4/1709	15/18253	0.0451857	1
4	GO:0046457	BP	prostanoid biosynthetic process	4/1709	15/18253	0.0451857	1
4	GO:0002068	BP	glandular epithelial cell development	4/1709	15/18253	0.0451857	1
4	GO:0032682	BP	negative regulation of chemokine production	4/1709	15/18253	0.0451857	1
4	GO:0030970	BP	retrograde protein transport, ER to cytosol	4/1709	15/18253	0.0451857	1
4	GO:0010669	BP	epithelial structure maintenance	4/1709	15/18253	0.0451857	1
4	GO:1902931	BP	negative regulation of alcohol biosynthetic process	4/1709	15/18253	0.0451857	1
390	GO:0071840	BP	cellular component organization or biogenesis	390/1709	3821/18253	0.0456489	1
460	GO:0080090	BP	regulation of primary metabolic process	460/1709	4546/18253	0.0457308	1
53	GO:0045936	BP	negative regulation of phosphate metabolic process	53/1709	436/18253	0.0458165	1
53	GO:0010563	BP	negative regulation of phosphorus metabolic process	53/1709	436/18253	0.0458165	1
307	GO:0051234	BP	establishment of localization	307/1709	2968/18253	0.0458819	1
11	GO:0048489	BP	synaptic vesicle transport	11/1709	63/18253	0.046055	1
11	GO:0097480	BP	establishment of synaptic vesicle localization	11/1709	63/18253	0.046055	1
10	GO:0034728	BP	nucleosome organization	10/1709	194/18253	0.0462316	1
2	GO:0002905	BP	regulation of mature B cell apoptotic process	2/1709	4/18253	0.0462439	1
2	GO:0002906	BP	negative regulation of mature B cell apoptotic process	2/1709	4/18253	0.0462439	1
2	GO:0090131	BP	mesenchyme migration	2/1709	4/18253	0.0462439	1
2	GO:0042167	BP	heme catabolic process	2/1709	4/18253	0.0462439	1
2	GO:0038027	BP	apolipoprotein A-I-mediated signaling pathway	2/1709	4/18253	0.0462439	1
2	GO:0019405	BP	alditol catabolic process	2/1709	4/18253	0.0462439	1
2	GO:0070172	BP	positive regulation of tooth mineralization	2/1709	4/18253	0.0462439	1
2	GO:0006499	BP	N-terminal protein myristoylation	2/1709	4/18253	0.0462439	1
2	GO:0034135	BP	regulation of toll-like receptor 2 signaling pathway	2/1709	4/18253	0.0462439	1
2	GO:0061304	BP	retinal blood vessel morphogenesis	2/1709	4/18253	0.0462439	1
2	GO:1902603	BP	carnitine transmembrane transport	2/1709	4/18253	0.0462439	1
2	GO:0014745	BP	negative regulation of muscle adaptation	2/1709	4/18253	0.0462439	1
2	GO:0090206	BP	negative regulation of cholesterol metabolic process	2/1709	4/18253	0.0462439	1
2	GO:1903026	BP	negative regulation of RNA polymerase II regulatory region sequence-specific DNA binding	2/1709	4/18253	0.0462439	1
2	GO:1900452	BP	regulation of long term synaptic depression	2/1709	4/18253	0.0462439	1
2	GO:0006537	BP	glutamate biosynthetic process	2/1709	4/18253	0.0462439	1
2	GO:1900020	BP	positive regulation of protein kinase C activity	2/1709	4/18253	0.0462439	1
2	GO:0030950	BP	establishment or maintenance of actin cytoskeleton polarity	2/1709	4/18253	0.0462439	1
2	GO:0046208	BP	spermine catabolic process	2/1709	4/18253	0.0462439	1
2	GO:1902172	BP	regulation of keratinocyte apoptotic process	2/1709	4/18253	0.0462439	1
2	GO:0060664	BP	epithelial cell proliferation involved in salivary gland morphogenesis	2/1709	4/18253	0.0462439	1
2	GO:0048818	BP	positive regulation of hair follicle maturation	2/1709	4/18253	0.0462439	1
2	GO:0007442	BP	hindgut morphogenesis	2/1709	4/18253	0.0462439	1
2	GO:0002606	BP	positive regulation of dendritic cell antigen processing and presentation	2/1709	4/18253	0.0462439	1
2	GO:0036091	BP	positive regulation of transcription from RNA polymerase II promoter in response to oxidative stress	2/1709	4/18253	0.0462439	1
2	GO:0010637	BP	negative regulation of mitochondrial fusion	2/1709	4/18253	0.0462439	1
2	GO:0061030	BP	epithelial cell differentiation involved in mammary gland alveolus development	2/1709	4/18253	0.0462439	1
2	GO:0006787	BP	porphyrin-containing compound catabolic process	2/1709	4/18253	0.0462439	1
2	GO:0010510	BP	regulation of acetyl-CoA biosynthetic process from pyruvate	2/1709	4/18253	0.0462439	1
2	GO:0045837	BP	negative regulation of membrane potential	2/1709	4/18253	0.0462439	1
2	GO:0007016	BP	cytoskeletal anchoring at plasma membrane	2/1709	4/18253	0.0462439	1
2	GO:0060763	BP	mammary duct terminal end bud growth	2/1709	4/18253	0.0462439	1
2	GO:0046498	BP	S-adenosylhomocysteine metabolic process	2/1709	4/18253	0.0462439	1
2	GO:0046149	BP	pigment catabolic process	2/1709	4/18253	0.0462439	1
2	GO:0060686	BP	negative regulation of prostatic bud formation	2/1709	4/18253	0.0462439	1
2	GO:0070837	BP	dehydroascorbic acid transport	2/1709	4/18253	0.0462439	1
2	GO:0006547	BP	histidine metabolic process	2/1709	4/18253	0.0462439	1
2	GO:1900133	BP	regulation of renin secretion into blood stream	2/1709	4/18253	0.0462439	1
2	GO:0001539	BP	cilium or flagellum-dependent cell motility	2/1709	4/18253	0.0462439	1
2	GO:0032489	BP	regulation of Cdc42 protein signal transduction	2/1709	4/18253	0.0462439	1
2	GO:1903826	BP	arginine transmembrane transport	2/1709	4/18253	0.0462439	1
2	GO:0060235	BP	lens induction in camera-type eye	2/1709	4/18253	0.0462439	1
2	GO:0070874	BP	negative regulation of glycogen metabolic process	2/1709	4/18253	0.0462439	1
2	GO:0002431	BP	Fc receptor mediated stimulatory signaling pathway	2/1709	4/18253	0.0462439	1
2	GO:0021938	BP	smoothened signaling pathway involved in regulation of cerebellar granule cell precursor cell proliferation	2/1709	4/18253	0.0462439	1
2	GO:0042940	BP	D-amino acid transport	2/1709	4/18253	0.0462439	1
2	GO:0099550	BP	trans-synaptic signalling, modulating synaptic transmission	2/1709	4/18253	0.0462439	1
2	GO:0048318	BP	axial mesoderm development	2/1709	4/18253	0.0462439	1
2	GO:0045541	BP	negative regulation of cholesterol biosynthetic process	2/1709	4/18253	0.0462439	1
2	GO:0061314	BP	Notch signaling involved in heart development	2/1709	4/18253	0.0462439	1
2	GO:0010991	BP	negative regulation of SMAD protein complex assembly	2/1709	4/18253	0.0462439	1
2	GO:0010990	BP	regulation of SMAD protein complex assembly	2/1709	4/18253	0.0462439	1
2	GO:0044332	BP	Wnt signaling pathway involved in dorsal/ventral axis specification	2/1709	4/18253	0.0462439	1
2	GO:0045629	BP	negative regulation of T-helper 2 cell differentiation	2/1709	4/18253	0.0462439	1
2	GO:0002069	BP	columnar/cuboidal epithelial cell maturation	2/1709	4/18253	0.0462439	1
2	GO:0071694	BP	maintenance of protein location in extracellular region	2/1709	4/18253	0.0462439	1
2	GO:0006548	BP	histidine catabolic process	2/1709	4/18253	0.0462439	1
2	GO:1900019	BP	regulation of protein kinase C activity	2/1709	4/18253	0.0462439	1
2	GO:0060287	BP	epithelial cilium movement involved in determination of left/right asymmetry	2/1709	4/18253	0.0462439	1
2	GO:0060285	BP	cilium-dependent cell motility	2/1709	4/18253	0.0462439	1
2	GO:0001839	BP	neural plate morphogenesis	2/1709	4/18253	0.0462439	1
2	GO:0090382	BP	phagosome maturation	2/1709	4/18253	0.0462439	1
2	GO:0046110	BP	xanthine metabolic process	2/1709	4/18253	0.0462439	1
2	GO:0061047	BP	positive regulation of branching involved in lung morphogenesis	2/1709	4/18253	0.0462439	1
2	GO:0009448	BP	gamma-aminobutyric acid metabolic process	2/1709	4/18253	0.0462439	1
2	GO:0006244	BP	pyrimidine nucleotide catabolic process	2/1709	4/18253	0.0462439	1
2	GO:0060750	BP	epithelial cell proliferation involved in mammary gland duct elongation	2/1709	4/18253	0.0462439	1
2	GO:0051387	BP	negative regulation of neurotrophin TRK receptor signaling pathway	2/1709	4/18253	0.0462439	1
2	GO:0046959	BP	habituation	2/1709	4/18253	0.0462439	1
2	GO:0072719	BP	cellular response to cisplatin	2/1709	4/18253	0.0462439	1
2	GO:0072718	BP	response to cisplatin	2/1709	4/18253	0.0462439	1
2	GO:0045793	BP	positive regulation of cell size	2/1709	4/18253	0.0462439	1
2	GO:0048755	BP	branching morphogenesis of a nerve	2/1709	4/18253	0.0462439	1
2	GO:0032497	BP	detection of lipopolysaccharide	2/1709	4/18253	0.0462439	1
2	GO:0033015	BP	tetrapyrrole catabolic process	2/1709	4/18253	0.0462439	1
2	GO:0042769	BP	DNA damage response, detection of DNA damage	2/1709	4/18253	0.0462439	1
2	GO:0001922	BP	B-1 B cell homeostasis	2/1709	4/18253	0.0462439	1
2	GO:0035694	BP	mitochondrial protein catabolic process	2/1709	4/18253	0.0462439	1
108	GO:0006351	BP	transcription, DNA-templated	108/1709	963/18253	0.0465299	1
108	GO:0097659	BP	nucleic acid-templated transcription	108/1709	964/18253	0.0467243	1
17	GO:0022408	BP	negative regulation of cell-cell adhesion	17/1709	111/18253	0.0471038	1
36	GO:0051090	BP	regulation of sequence-specific DNA binding transcription factor activity	36/1709	277/18253	0.0472865	1
103	GO:0051130	BP	positive regulation of cellular component organization	103/1709	914/18253	0.0474018	1
13	GO:0055088	BP	lipid homeostasis	13/1709	78/18253	0.0474691	1
15	GO:0042445	BP	hormone metabolic process	15/1709	94/18253	0.0476404	1
27	GO:0051251	BP	positive regulation of lymphocyte activation	27/1709	197/18253	0.0476663	1
30	GO:1903037	BP	regulation of leukocyte cell-cell adhesion	30/1709	223/18253	0.0479642	1
11	GO:0033559	BP	unsaturated fatty acid metabolic process	11/1709	64/18253	0.0481813	1
17	GO:0030308	BP	negative regulation of cell growth	17/1709	112/18253	0.0482695	1
82	GO:0042327	BP	positive regulation of phosphorylation	82/1709	710/18253	0.048325	1
36	GO:0006897	BP	endocytosis	36/1709	279/18253	0.0483541	1
27	GO:0071396	BP	cellular response to lipid	27/1709	198/18253	0.0483782	1
6	GO:0051180	BP	vitamin transport	6/1709	29/18253	0.0487267	1
6	GO:0048791	BP	calcium ion-regulated exocytosis of neurotransmitter	6/1709	29/18253	0.0487267	1
6	GO:0071772	BP	response to BMP	6/1709	29/18253	0.0487267	1
6	GO:0071773	BP	cellular response to BMP stimulus	6/1709	29/18253	0.0487267	1
6	GO:0000096	BP	sulfur amino acid metabolic process	6/1709	29/18253	0.0487267	1
6	GO:0035137	BP	hindlimb morphogenesis	6/1709	29/18253	0.0487267	1
6	GO:0046068	BP	cGMP metabolic process	6/1709	29/18253	0.0487267	1
6	GO:0015804	BP	neutral amino acid transport	6/1709	29/18253	0.0487267	1
6	GO:0002066	BP	columnar/cuboidal epithelial cell development	6/1709	29/18253	0.0487267	1
15	GO:0002700	BP	regulation of production of molecular mediator of immune response	15/1709	95/18253	0.0487812	1
15	GO:0051250	BP	negative regulation of lymphocyte activation	15/1709	95/18253	0.0487812	1
13	GO:0010811	BP	positive regulation of cell-substrate adhesion	13/1709	79/18253	0.0488626	1
5	GO:2000108	BP	positive regulation of leukocyte apoptotic process	5/1709	22/18253	0.0489737	1
5	GO:0003044	BP	regulation of systemic arterial blood pressure mediated by a chemical signal	5/1709	22/18253	0.0489737	1
5	GO:1900744	BP	regulation of p38MAPK cascade	5/1709	22/18253	0.0489737	1
5	GO:0042558	BP	pteridine-containing compound metabolic process	5/1709	22/18253	0.0489737	1
5	GO:0050869	BP	negative regulation of B cell activation	5/1709	22/18253	0.0489737	1
5	GO:0006692	BP	prostanoid metabolic process	5/1709	22/18253	0.0489737	1
5	GO:2000772	BP	regulation of cellular senescence	5/1709	22/18253	0.0489737	1
5	GO:0006693	BP	prostaglandin metabolic process	5/1709	22/18253	0.0489737	1
5	GO:0000731	BP	DNA synthesis involved in DNA repair	5/1709	22/18253	0.0489737	1
5	GO:0045992	BP	negative regulation of embryonic development	5/1709	22/18253	0.0489737	1
104	GO:0042592	BP	homeostatic process	104/1709	927/18253	0.0490935	1
43	GO:0033674	BP	positive regulation of kinase activity	43/1709	344/18253	0.049331	1
1045	GO:0043226	CC	organelle	1045/1709	9486/18253	6.08138e-10	1.15084e-05
813	GO:0043231	CC	intracellular membrane-bounded organelle	813/1709	7321/18253	6.46335e-10	1.22313e-05
975	GO:0043227	CC	membrane-bounded organelle	975/1709	8558/18253	6.82999e-10	1.29251e-05
1158	GO:0044424	CC	intracellular part	1158/1709	11081/18253	7.82715e-10	1.48121e-05
442	GO:0005737	CC	cytoplasm	442/1709	3743/18253	2.00565e-08	0.000379549
695	GO:0044444	CC	cytoplasmic part	695/1709	6303/18253	3.06693e-08	0.000580387
886	GO:0043229	CC	intracellular organelle	886/1709	8309/18253	4.00271e-08	0.000757473
360	GO:0044421	CC	extracellular region part	360/1709	3020/18253	2.79239e-07	0.00528431
6	GO:0005840	CC	ribosome	6/1709	297/18253	5.29225e-07	0.010015
269	GO:1903561	CC	extracellular vesicle	269/1709	2183/18253	1.13451e-06	0.0214696
269	GO:0043230	CC	extracellular organelle	269/1709	2184/18253	1.14136e-06	0.0215991
320	GO:0031982	CC	vesicle	320/1709	2678/18253	1.43148e-06	0.0270893
265	GO:0070062	CC	extracellular exosome	265/1709	2169/18253	2.83053e-06	0.053565
6	GO:0044391	CC	ribosomal subunit	6/1709	257/18253	1.16048e-05	0.219608
45	GO:0030529	CC	intracellular ribonucleoprotein complex	45/1709	798/18253	0.000110435	1
45	GO:1990904	CC	ribonucleoprotein complex	45/1709	799/18253	0.000110853	1
59	GO:0009986	CC	cell surface	59/1709	380/18253	0.000112956	1
7	GO:0042613	CC	MHC class II protein complex	7/1709	15/18253	0.000203824	1
35	GO:0005578	CC	proteinaceous extracellular matrix	35/1709	199/18253	0.000309332	1
106	GO:0005783	CC	endoplasmic reticulum	106/1709	808/18253	0.000328239	1
77	GO:0044463	CC	cell projection part	77/1709	551/18253	0.000344854	1
4	GO:0005858	CC	axonemal dynein complex	4/1709	5/18253	0.000354389	1
15	GO:0005930	CC	axoneme	15/1709	62/18253	0.000471376	1
266	GO:0005829	CC	cytosol	266/1709	2350/18253	0.000634653	1
134	GO:0098588	CC	bounding membrane of organelle	134/1709	1080/18253	0.000672444	1
19	GO:0044420	CC	extracellular matrix component	19/1709	91/18253	0.000789135	1
3	GO:0097629	CC	extrinsic component of omegasome membrane	3/1709	3/18253	0.000819468	1
452	GO:0016021	CC	integral component of membrane	452/1709	5465/18253	0.000869683	1
54	GO:0031012	CC	extracellular matrix	54/1709	368/18253	0.00104584	1
460	GO:0031224	CC	intrinsic component of membrane	460/1709	5525/18253	0.0014676	1
5	GO:0005681	CC	spliceosomal complex	5/1709	169/18253	0.00201959	1
5	GO:0015934	CC	large ribosomal subunit	5/1709	171/18253	0.00209106	1
1581	GO:0005575	CC	cellular_component	1581/1709	16512/18253	0.00211298	1
27	GO:0031253	CC	cell projection membrane	27/1709	159/18253	0.00230021	1
3	GO:0036157	CC	outer dynein arm	3/1709	4/18253	0.00304806	1
5	GO:0044447	CC	axoneme part	5/1709	12/18253	0.00322887	1
157	GO:0005739	CC	mitochondrion	157/1709	1347/18253	0.00350789	1
4	GO:0044233	CC	ER-mitochondrion membrane contact site	4/1709	8/18253	0.00393642	1
125	GO:0005615	CC	extracellular space	125/1709	1047/18253	0.00442325	1
1	GO:0015935	CC	small ribosomal subunit	1/1709	87/18253	0.00453509	1
10	GO:0005901	CC	caveola	10/1709	42/18253	0.00455589	1
14	GO:0005604	CC	basement membrane	14/1709	67/18253	0.00457704	1
25	GO:0019898	CC	extrinsic component of membrane	25/1709	152/18253	0.00483775	1
7	GO:0042611	CC	MHC protein complex	7/1709	24/18253	0.00516817	1
362	GO:0032991	CC	macromolecular complex	362/1709	4364/18253	0.00558477	1
24	GO:0044452	CC	nucleolar part	24/1709	145/18253	0.00587063	1
13	GO:0044445	CC	cytosolic part	13/1709	275/18253	0.00633119	1
76	GO:0005773	CC	vacuole	76/1709	597/18253	0.00646778	1
17	GO:0098858	CC	actin-based cell projection	17/1709	93/18253	0.00650543	1
95	GO:0005794	CC	Golgi apparatus	95/1709	775/18253	0.00661065	1
11	GO:0044853	CC	plasma membrane raft	11/1709	51/18253	0.00666812	1
31	GO:0000323	CC	lytic vacuole	31/1709	202/18253	0.00696074	1
31	GO:0005764	CC	lysosome	31/1709	202/18253	0.00696074	1
5	GO:0031932	CC	TORC2 complex	5/1709	14/18253	0.00696301	1
10	GO:0030175	CC	filopodium	10/1709	45/18253	0.00763826	1
7	GO:0031526	CC	brush border membrane	7/1709	26/18253	0.00832466	1
7	GO:0031941	CC	filamentous actin	7/1709	26/18253	0.00832466	1
19	GO:0030496	CC	midbody	19/1709	111/18253	0.00844088	1
23	GO:0005769	CC	early endosome	23/1709	142/18253	0.00860905	1
2	GO:0020003	CC	symbiont-containing vacuole	2/1709	2/18253	0.00876164	1
2	GO:1990622	CC	CHOP-ATF3 complex	2/1709	2/18253	0.00876164	1
2	GO:0032545	CC	CURI complex	2/1709	2/18253	0.00876164	1
2	GO:0097129	CC	cyclin D2-CDK4 complex	2/1709	2/18253	0.00876164	1
2	GO:0033257	CC	Bcl3/NF-kappaB2 complex	2/1709	2/18253	0.00876164	1
2	GO:0097632	CC	extrinsic component of pre-autophagosomal structure membrane	2/1709	2/18253	0.00876164	1
2	GO:0034456	CC	UTP-C complex	2/1709	2/18253	0.00876164	1
2	GO:1990769	CC	proximal neuron projection	2/1709	2/18253	0.00876164	1
2	GO:1990617	CC	CHOP-ATF4 complex	2/1709	2/18253	0.00876164	1
449	GO:0005634	CC	nucleus	449/1709	4333/18253	0.0102326	1
185	GO:0044459	CC	plasma membrane part	185/1709	1661/18253	0.0103799	1
66	GO:0098590	CC	plasma membrane region	66/1709	522/18253	0.0116991	1
2	GO:0071013	CC	catalytic step 2 spliceosome	2/1709	95/18253	0.0117718	1
6	GO:0098798	CC	mitochondrial protein complex	6/1709	160/18253	0.0131237	1
3	GO:0033256	CC	I-kappaB/NF-kappaB complex	3/1709	6/18253	0.0131932	1
3	GO:0065010	CC	extracellular membrane-bounded organelle	3/1709	6/18253	0.0131932	1
184	GO:0031090	CC	organelle membrane	184/1709	1660/18253	0.0132858	1
25	GO:0016324	CC	apical plasma membrane	25/1709	162/18253	0.0137062	1
32	GO:0005874	CC	microtubule	32/1709	224/18253	0.0149649	1
9	GO:0005902	CC	microvillus	9/1709	43/18253	0.0164107	1
5	GO:0038201	CC	TOR complex	5/1709	17/18253	0.0169879	1
4	GO:0044232	CC	organelle membrane contact site	4/1709	12/18253	0.0205269	1
262	GO:0005886	CC	plasma membrane	262/1709	3166/18253	0.0205893	1
3	GO:1990124	CC	messenger ribonucleoprotein complex	3/1709	7/18253	0.021494	1
77	GO:0098589	CC	membrane region	77/1709	640/18253	0.0223851	1
15	GO:0031968	CC	organelle outer membrane	15/1709	87/18253	0.024117	1
2	GO:0030677	CC	ribonuclease P complex	2/1709	3/18253	0.024646	1
2	GO:0031094	CC	platelet dense tubular network	2/1709	3/18253	0.024646	1
2	GO:0005655	CC	nucleolar ribonuclease P complex	2/1709	3/18253	0.024646	1
2	GO:1990037	CC	Lewy body core	2/1709	3/18253	0.024646	1
2	GO:0031074	CC	nucleocytoplasmic shuttling complex	2/1709	3/18253	0.024646	1
2	GO:0005588	CC	collagen type V trimer	2/1709	3/18253	0.024646	1
2	GO:0097449	CC	astrocyte projection	2/1709	3/18253	0.024646	1
2	GO:0030681	CC	multimeric ribonuclease P complex	2/1709	3/18253	0.024646	1
15	GO:0019867	CC	outer membrane	15/1709	89/18253	0.0259045	1
11	GO:0016459	CC	myosin complex	11/1709	61/18253	0.0272844	1
21	GO:0015630	CC	microtubule cytoskeleton	21/1709	140/18253	0.0280729	1
1	GO:0070603	CC	SWI/SNF superfamily-type complex	1/1709	64/18253	0.0285991	1
47	GO:0005789	CC	endoplasmic reticulum membrane	47/1709	368/18253	0.0294976	1
5	GO:0098800	CC	inner mitochondrial membrane protein complex	5/1709	128/18253	0.0317724	1
3	GO:1990316	CC	ATG1/ULK1 kinase complex	3/1709	8/18253	0.0320285	1
3	GO:0097542	CC	ciliary tip	3/1709	8/18253	0.0320285	1
1343	GO:0044464	CC	cell part	1343/1709	13963/18253	0.0333679	1
9	GO:0005788	CC	endoplasmic reticulum lumen	9/1709	45/18253	0.0337204	1
10	GO:0042470	CC	melanosome	10/1709	55/18253	0.0343865	1
10	GO:0048770	CC	pigment granule	10/1709	55/18253	0.0343865	1
46	GO:0048471	CC	perinuclear region of cytoplasm	46/1709	361/18253	0.0351392	1
560	GO:0044425	CC	membrane part	560/1709	6404/18253	0.0354656	1
6	GO:0001917	CC	photoreceptor inner segment	6/1709	27/18253	0.0355954	1
6	GO:0016529	CC	sarcoplasmic reticulum	6/1709	27/18253	0.0355954	1
23	GO:0045121	CC	membrane raft	23/1709	161/18253	0.04021	1
23	GO:0098857	CC	membrane microdomain	23/1709	161/18253	0.04021	1
9	GO:0005903	CC	brush border	9/1709	48/18253	0.0409632	1
1	GO:0022627	CC	cytosolic small ribosomal subunit	1/1709	59/18253	0.0410459	1
1	GO:0097525	CC	spliceosomal snRNP complex	1/1709	60/18253	0.041773	1
5	GO:0005882	CC	intermediate filament	5/1709	125/18253	0.0430959	1
9	GO:0032587	CC	ruffle membrane	9/1709	49/18253	0.0442044	1
12	GO:0031256	CC	leading edge membrane	12/1709	73/18253	0.0442385	1
4	GO:0022625	CC	cytosolic large ribosomal subunit	4/1709	106/18253	0.0443405	1
3	GO:0005740	CC	mitochondrial envelope	3/1709	9/18253	0.0447612	1
3	GO:0031616	CC	spindle pole centrosome	3/1709	9/18253	0.0447612	1
2	GO:0042567	CC	insulin-like growth factor ternary complex	2/1709	4/18253	0.0462439	1
2	GO:0043527	CC	tRNA methyltransferase complex	2/1709	4/18253	0.0462439	1
2	GO:0030485	CC	smooth muscle contractile fiber	2/1709	4/18253	0.0462439	1
2	GO:0035976	CC	AP1 complex	2/1709	4/18253	0.0462439	1
2	GO:0098803	CC	respiratory chain complex	2/1709	77/18253	0.0463669	1
629	GO:0044422	CC	organelle part	629/1709	6322/18253	0.0482096	1
23	GO:0004930	MF	G-protein coupled receptor activity	23/1709	1377/18253	3.17507e-10	6.00851e-06
2	GO:0004984	MF	olfactory receptor activity	2/1709	971/18253	3.33709e-10	6.31511e-06
60	GO:0099600	MF	transmembrane receptor activity	60/1709	1727/18253	3.36726e-10	6.3722e-06
89	GO:0004872	MF	receptor activity	89/1709	1960/18253	3.72989e-10	7.05844e-06
89	GO:0060089	MF	molecular transducer activity	89/1709	1960/18253	3.72989e-10	7.05844e-06
56	GO:0004888	MF	transmembrane signaling receptor activity	56/1709	1690/18253	3.99448e-10	7.55916e-06
67	GO:0038023	MF	signaling receptor activity	67/1709	1771/18253	4.02711e-10	7.6209e-06
96	GO:0004871	MF	signal transducer activity	96/1709	2036/18253	4.33896e-10	8.21104e-06
295	GO:0043168	MF	anion binding	295/1709	2259/18253	1.20837e-09	2.28671e-05
1	GO:0005549	MF	odorant binding	1/1709	235/18253	3.11849e-09	5.90144e-05
599	GO:0005515	MF	protein binding	599/1709	5286/18253	1.04745e-08	0.00019822
602	GO:0003824	MF	catalytic activity	602/1709	5324/18253	1.32683e-08	0.000251089
267	GO:0036094	MF	small molecule binding	267/1709	2075/18253	2.39248e-08	0.000452754
246	GO:0097367	MF	carbohydrate derivative binding	246/1709	1900/18253	5.76959e-08	0.00109184
237	GO:1901265	MF	nucleoside phosphate binding	237/1709	1836/18253	1.48006e-07	0.00280086
237	GO:0000166	MF	nucleotide binding	237/1709	1836/18253	1.48006e-07	0.00280086
58	GO:0000982	MF	transcription factor activity, RNA polymerase II core promoter proximal region sequence-specific binding	58/1709	310/18253	3.1706e-07	0.00600005
210	GO:0032550	MF	purine ribonucleoside binding	210/1709	1610/18253	3.80556e-07	0.00720164
210	GO:0001883	MF	purine nucleoside binding	210/1709	1611/18253	3.86093e-07	0.00730642
210	GO:0032549	MF	ribonucleoside binding	210/1709	1613/18253	4.88573e-07	0.00924575
210	GO:0001882	MF	nucleoside binding	210/1709	1617/18253	5.11505e-07	0.00967972
213	GO:0032553	MF	ribonucleotide binding	213/1709	1648/18253	6.34142e-07	0.0120005
211	GO:0032555	MF	purine ribonucleotide binding	211/1709	1634/18253	7.30944e-07	0.0138324
208	GO:0035639	MF	purine ribonucleoside triphosphate binding	208/1709	1604/18253	7.3146e-07	0.0138422
519	GO:0043167	MF	ion binding	519/1709	4620/18253	7.63418e-07	0.0144469
211	GO:0017076	MF	purine nucleotide binding	211/1709	1640/18253	9.59167e-07	0.0181513
1081	GO:0005488	MF	binding	1081/1709	10535/18253	1.01085e-06	0.0191294
104	GO:0000975	MF	regulatory region DNA binding	104/1709	694/18253	1.44251e-06	0.0272981
104	GO:0001067	MF	regulatory region nucleic acid binding	104/1709	694/18253	1.44251e-06	0.0272981
103	GO:0044212	MF	transcription regulatory region DNA binding	103/1709	691/18253	1.93718e-06	0.0366591
89	GO:1990837	MF	sequence-specific double-stranded DNA binding	89/1709	580/18253	2.97144e-06	0.0562315
6	GO:0003735	MF	structural constituent of ribosome	6/1709	269/18253	4.105e-06	0.077683
84	GO:0000976	MF	transcription regulatory region sequence-specific DNA binding	84/1709	551/18253	7.19432e-06	0.136145
75	GO:0001012	MF	RNA polymerase II regulatory region DNA binding	75/1709	489/18253	1.85588e-05	0.351207
75	GO:0000977	MF	RNA polymerase II regulatory region sequence-specific DNA binding	75/1709	489/18253	1.85588e-05	0.351207
91	GO:0003690	MF	double-stranded DNA binding	91/1709	644/18253	6.09823e-05	1
24	GO:0017137	MF	Rab GTPase binding	24/1709	110/18253	8.63088e-05	1
50	GO:0000987	MF	core promoter proximal region sequence-specific DNA binding	50/1709	306/18253	9.63763e-05	1
50	GO:0001159	MF	core promoter proximal region DNA binding	50/1709	307/18253	0.000100825	1
160	GO:0032559	MF	adenyl ribonucleotide binding	160/1709	1283/18253	0.000126992	1
15	GO:0005200	MF	structural constituent of cytoskeleton	15/1709	56/18253	0.000140747	1
160	GO:0030554	MF	adenyl nucleotide binding	160/1709	1288/18253	0.000158871	1
48	GO:0000978	MF	RNA polymerase II core promoter proximal region sequence-specific DNA binding	48/1709	296/18253	0.000168551	1
115	GO:0043565	MF	sequence-specific DNA binding	115/1709	874/18253	0.000168811	1
157	GO:0005524	MF	ATP binding	157/1709	1262/18253	0.000168885	1
23	GO:0016614	MF	oxidoreductase activity, acting on CH-OH group of donors	23/1709	109/18253	0.000181813	1
83	GO:0000981	MF	RNA polymerase II transcription factor activity, sequence-specific DNA binding	83/1709	595/18253	0.000244211	1
36	GO:0001077	MF	transcriptional activator activity, RNA polymerase II core promoter proximal region sequence-specific binding	36/1709	209/18253	0.000297198	1
4	GO:0016717	MF	oxidoreductase activity, acting on paired donors, with oxidation of a pair of donors resulting in the reduction of molecular oxygen to two molecules of water	4/1709	5/18253	0.000354389	1
172	GO:0019899	MF	enzyme binding	172/1709	1425/18253	0.000445727	1
21	GO:0001078	MF	transcriptional repressor activity, RNA polymerase II core promoter proximal region sequence-specific binding	21/1709	103/18253	0.000533732	1
19	GO:0016616	MF	oxidoreductase activity, acting on the CH-OH group of donors, NAD or NADP as acceptor	19/1709	88/18253	0.000597153	1
53	GO:0005525	MF	GTP binding	53/1709	354/18253	0.000600851	1
41	GO:0051020	MF	GTPase binding	41/1709	255/18253	0.000688459	1
28	GO:0001227	MF	transcriptional repressor activity, RNA polymerase II transcription regulatory region sequence-specific binding	28/1709	157/18253	0.000808693	1
3	GO:0016841	MF	ammonia-lyase activity	3/1709	3/18253	0.000819468	1
12	GO:0015179	MF	L-amino acid transmembrane transporter activity	12/1709	46/18253	0.000830459	1
36	GO:0017016	MF	Ras GTPase binding	36/1709	222/18253	0.00105305	1
65	GO:0019900	MF	kinase binding	65/1709	466/18253	0.00119725	1
41	GO:0003924	MF	GTPase activity	41/1709	262/18253	0.00120695	1
37	GO:0031267	MF	small GTPase binding	37/1709	231/18253	0.0012897	1
17	GO:0015171	MF	amino acid transmembrane transporter activity	17/1709	80/18253	0.00138953	1
53	GO:0032561	MF	guanyl ribonucleotide binding	53/1709	366/18253	0.00141253	1
53	GO:0019001	MF	guanyl nucleotide binding	53/1709	367/18253	0.00144644	1
40	GO:0008509	MF	anion transmembrane transporter activity	40/1709	262/18253	0.001847	1
8	GO:0016645	MF	oxidoreductase activity, acting on the CH-NH group of donors	8/1709	26/18253	0.00194688	1
36	GO:0048037	MF	cofactor binding	36/1709	230/18253	0.00197456	1
25	GO:0043177	MF	organic acid binding	25/1709	142/18253	0.00201656	1
25	GO:0031406	MF	carboxylic acid binding	25/1709	142/18253	0.00201656	1
5	GO:0070696	MF	transmembrane receptor protein serine/threonine kinase binding	5/1709	11/18253	0.0020399	1
22	GO:0046943	MF	carboxylic acid transmembrane transporter activity	22/1709	118/18253	0.00207376	1
98	GO:0016462	MF	pyrophosphatase activity	98/1709	781/18253	0.00254028	1
12	GO:0030170	MF	pyridoxal phosphate binding	12/1709	52/18253	0.00260446	1
24	GO:0001047	MF	core promoter binding	24/1709	136/18253	0.00262094	1
22	GO:0008083	MF	growth factor activity	22/1709	123/18253	0.002764	1
34	GO:0030695	MF	GTPase regulator activity	34/1709	215/18253	0.00292279	1
3	GO:0003873	MF	6-phosphofructo-2-kinase activity	3/1709	4/18253	0.00304806	1
3	GO:0015057	MF	thrombin receptor activity	3/1709	4/18253	0.00304806	1
98	GO:0016818	MF	hydrolase activity, acting on acid anhydrides, in phosphorus-containing anhydrides	98/1709	784/18253	0.00314649	1
5	GO:0033612	MF	receptor serine/threonine kinase binding	5/1709	12/18253	0.00322887	1
98	GO:0016817	MF	hydrolase activity, acting on acid anhydrides	98/1709	788/18253	0.00327483	1
6	GO:0016646	MF	oxidoreductase activity, acting on the CH-NH group of donors, NAD or NADP as acceptor	6/1709	17/18253	0.003335	1
545	GO:0097159	MF	organic cyclic compound binding	545/1709	5257/18253	0.00351291	1
23	GO:0005342	MF	organic acid transmembrane transporter activity	23/1709	131/18253	0.00359219	1
93	GO:0017111	MF	nucleoside-triphosphatase activity	93/1709	743/18253	0.00373096	1
4	GO:0051787	MF	misfolded protein binding	4/1709	8/18253	0.00393642	1
4	GO:0071933	MF	Arp2/3 complex binding	4/1709	8/18253	0.00393642	1
31	GO:0005096	MF	GTPase activator activity	31/1709	199/18253	0.00456213	1
43	GO:0001228	MF	transcriptional activator activity, RNA polymerase II transcription regulatory region sequence-specific binding	43/1709	301/18253	0.00500492	1
25	GO:0016829	MF	lyase activity	25/1709	153/18253	0.00511754	1
7	GO:0016709	MF	oxidoreductase activity, acting on paired donors, with incorporation or reduction of molecular oxygen, NAD(P)H as one donor, and incorporation of one atom of oxygen	7/1709	24/18253	0.00516817	1
22	GO:0003714	MF	transcription corepressor activity	22/1709	128/18253	0.00533955	1
535	GO:1901363	MF	heterocyclic compound binding	535/1709	5197/18253	0.00687199	1
5	GO:0005416	MF	cation:amino acid symporter activity	5/1709	14/18253	0.00696301	1
3	GO:0034596	MF	phosphatidylinositol phosphate 4-phosphatase activity	3/1709	5/18253	0.00708857	1
3	GO:0005072	MF	transforming growth factor beta receptor, cytoplasmic mediator activity	3/1709	5/18253	0.00708857	1
17	GO:0015293	MF	symporter activity	17/1709	95/18253	0.0076435	1
55	GO:0019901	MF	protein kinase binding	55/1709	411/18253	0.00764968	1
225	GO:0016740	MF	transferase activity	225/1709	2044/18253	0.00780334	1
29	GO:0015291	MF	secondary active transmembrane transporter activity	29/1709	189/18253	0.0078525	1
90	GO:0016301	MF	kinase activity	90/1709	735/18253	0.00795301	1
83	GO:0016773	MF	phosphotransferase activity, alcohol group as acceptor	83/1709	669/18253	0.00820002	1
7	GO:0005080	MF	protein kinase C binding	7/1709	26/18253	0.00832466	1
9	GO:0016860	MF	intramolecular oxidoreductase activity	9/1709	39/18253	0.0086442	1
2	GO:0016979	MF	lipoate-protein ligase activity	2/1709	2/18253	0.00876164	1
2	GO:0005314	MF	high-affinity glutamate transmembrane transporter activity	2/1709	2/18253	0.00876164	1
2	GO:0030160	MF	GKAP/Homer scaffold activity	2/1709	2/18253	0.00876164	1
2	GO:0005005	MF	transmembrane-ephrin receptor activity	2/1709	2/18253	0.00876164	1
2	GO:0008430	MF	selenium binding	2/1709	2/18253	0.00876164	1
2	GO:0034597	MF	phosphatidylinositol-4,5-bisphosphate 4-phosphatase activity	2/1709	2/18253	0.00876164	1
2	GO:0030226	MF	apolipoprotein receptor activity	2/1709	2/18253	0.00876164	1
2	GO:0090556	MF	phosphatidylserine-translocating ATPase activity	2/1709	2/18253	0.00876164	1
2	GO:0043183	MF	vascular endothelial growth factor receptor 1 binding	2/1709	2/18253	0.00876164	1
2	GO:0034188	MF	apolipoprotein A-I receptor activity	2/1709	2/18253	0.00876164	1
2	GO:0004613	MF	phosphoenolpyruvate carboxykinase (GTP) activity	2/1709	2/18253	0.00876164	1
2	GO:0004611	MF	phosphoenolpyruvate carboxykinase activity	2/1709	2/18253	0.00876164	1
2	GO:0003941	MF	L-serine ammonia-lyase activity	2/1709	2/18253	0.00876164	1
2	GO:0004152	MF	dihydroorotate dehydrogenase activity	2/1709	2/18253	0.00876164	1
2	GO:0000064	MF	L-ornithine transmembrane transporter activity	2/1709	2/18253	0.00876164	1
2	GO:0030617	MF	transforming growth factor beta receptor, inhibitory cytoplasmic mediator activity	2/1709	2/18253	0.00876164	1
2	GO:0004817	MF	cysteine-tRNA ligase activity	2/1709	2/18253	0.00876164	1
115	GO:0001071	MF	nucleic acid binding transcription factor activity	115/1709	976/18253	0.00930757	1
115	GO:0003700	MF	transcription factor activity, sequence-specific DNA binding	115/1709	976/18253	0.00930757	1
26	GO:0008514	MF	organic anion transmembrane transporter activity	26/1709	165/18253	0.00988194	1
35	GO:0060589	MF	nucleoside-triphosphatase regulator activity	35/1709	242/18253	0.0100733	1
4	GO:0005283	MF	sodium:amino acid symporter activity	4/1709	10/18253	0.0101351	1
9	GO:0005201	MF	extracellular matrix structural constituent	9/1709	40/18253	0.0102489	1
24	GO:0016874	MF	ligase activity	24/1709	150/18253	0.0102993	1
7	GO:0005520	MF	insulin-like growth factor binding	7/1709	27/18253	0.0103484	1
6	GO:0005343	MF	organic acid:sodium symporter activity	6/1709	21/18253	0.0105644	1
2	GO:0030594	MF	neurotransmitter receptor activity	2/1709	94/18253	0.0115019	1
12	GO:0005496	MF	steroid binding	12/1709	61/18253	0.0125114	1
5	GO:0008484	MF	sulfuric ester hydrolase activity	5/1709	16/18253	0.0129723	1
3	GO:0010340	MF	carboxyl-O-methyltransferase activity	3/1709	6/18253	0.0131932	1
3	GO:0051998	MF	protein carboxyl O-methyltransferase activity	3/1709	6/18253	0.0131932	1
3	GO:0000099	MF	sulfur amino acid transmembrane transporter activity	3/1709	6/18253	0.0131932	1
1	GO:0008170	MF	N-methyltransferase activity	1/1709	72/18253	0.0133649	1
1	GO:0008227	MF	G-protein coupled amine receptor activity	1/1709	73/18253	0.0136247	1
8	GO:0032934	MF	sterol binding	8/1709	35/18253	0.0137743	1
4	GO:0016813	MF	hydrolase activity, acting on carbon-nitrogen (but not peptide) bonds, in linear amidines	4/1709	11/18253	0.0147609	1
4	GO:0005313	MF	L-glutamate transmembrane transporter activity	4/1709	11/18253	0.0147609	1
4	GO:0048407	MF	platelet-derived growth factor binding	4/1709	11/18253	0.0147609	1
4	GO:0015172	MF	acidic amino acid transmembrane transporter activity	4/1709	11/18253	0.0147609	1
129	GO:0005102	MF	receptor binding	129/1709	1127/18253	0.0151123	1
7	GO:0015175	MF	neutral amino acid transmembrane transporter activity	7/1709	29/18253	0.0154295	1
14	GO:0016597	MF	amino acid binding	14/1709	77/18253	0.0160331	1
42	GO:0003779	MF	actin binding	42/1709	315/18253	0.018844	1
9	GO:0016875	MF	ligase activity, forming carbon-oxygen bonds	9/1709	44/18253	0.0189664	1
9	GO:0016876	MF	ligase activity, forming aminoacyl-tRNA and related compounds	9/1709	44/18253	0.0189664	1
9	GO:0004812	MF	aminoacyl-tRNA ligase activity	9/1709	44/18253	0.0189664	1
9	GO:0005160	MF	transforming growth factor beta receptor binding	9/1709	44/18253	0.0189664	1
20	GO:0005539	MF	glycosaminoglycan binding	20/1709	125/18253	0.0191664	1
248	GO:0016787	MF	hydrolase activity	248/1709	2316/18253	0.0198228	1
83	GO:0016491	MF	oxidoreductase activity	83/1709	695/18253	0.0200354	1
43	GO:0022804	MF	active transmembrane transporter activity	43/1709	323/18253	0.020126	1
4	GO:0008253	MF	5'-nucleotidase activity	4/1709	12/18253	0.0205269	1
4	GO:0015101	MF	organic cation transmembrane transporter activity	4/1709	12/18253	0.0205269	1
4	GO:0004861	MF	cyclin-dependent protein serine/threonine kinase inhibitor activity	4/1709	12/18253	0.0205269	1
4	GO:0045236	MF	CXCR chemokine receptor binding	4/1709	12/18253	0.0205269	1
4	GO:0072349	MF	modified amino acid transmembrane transporter activity	4/1709	12/18253	0.0205269	1
4	GO:0008417	MF	fucosyltransferase activity	4/1709	12/18253	0.0205269	1
3	GO:0019957	MF	C-C chemokine binding	3/1709	7/18253	0.021494	1
3	GO:0008443	MF	phosphofructokinase activity	3/1709	7/18253	0.021494	1
3	GO:0035005	MF	1-phosphatidylinositol-4-phosphate 3-kinase activity	3/1709	7/18253	0.021494	1
3	GO:0016863	MF	intramolecular oxidoreductase activity, transposing C=C bonds	3/1709	7/18253	0.021494	1
3	GO:0008140	MF	cAMP response element binding protein binding	3/1709	7/18253	0.021494	1
5	GO:0070840	MF	dynein complex binding	5/1709	18/18253	0.0217483	1
137	GO:0044877	MF	macromolecular complex binding	137/1709	1220/18253	0.022078	1
20	GO:0016853	MF	isomerase activity	20/1709	129/18253	0.0221533	1
14	GO:0015294	MF	solute:cation symporter activity	14/1709	82/18253	0.0223574	1
2	GO:0003886	MF	DNA (cytosine-5-)-methyltransferase activity	2/1709	3/18253	0.024646	1
2	GO:0016812	MF	hydrolase activity, acting on carbon-nitrogen (but not peptide) bonds, in cyclic amides	2/1709	3/18253	0.024646	1
2	GO:0004768	MF	stearoyl-CoA 9-desaturase activity	2/1709	3/18253	0.024646	1
2	GO:0008449	MF	N-acetylglucosamine-6-sulfatase activity	2/1709	3/18253	0.024646	1
2	GO:0019103	MF	pyrimidine nucleotide binding	2/1709	3/18253	0.024646	1
2	GO:0090554	MF	phosphatidylcholine-translocating ATPase activity	2/1709	3/18253	0.024646	1
2	GO:0055056	MF	D-glucose transmembrane transporter activity	2/1709	3/18253	0.024646	1
2	GO:0035877	MF	death effector domain binding	2/1709	3/18253	0.024646	1
2	GO:0015189	MF	L-lysine transmembrane transporter activity	2/1709	3/18253	0.024646	1
2	GO:0016215	MF	acyl-CoA desaturase activity	2/1709	3/18253	0.024646	1
2	GO:0047035	MF	testosterone dehydrogenase (NAD+) activity	2/1709	3/18253	0.024646	1
2	GO:0004719	MF	protein-L-isoaspartate (D-aspartate) O-methyltransferase activity	2/1709	3/18253	0.024646	1
2	GO:0070697	MF	activin receptor binding	2/1709	3/18253	0.024646	1
2	GO:0004305	MF	ethanolamine kinase activity	2/1709	3/18253	0.024646	1
2	GO:0008142	MF	oxysterol binding	2/1709	3/18253	0.024646	1
2	GO:0008107	MF	galactoside 2-alpha-L-fucosyltransferase activity	2/1709	3/18253	0.024646	1
2	GO:0031127	MF	alpha-(1,2)-fucosyltransferase activity	2/1709	3/18253	0.024646	1
2	GO:0035368	MF	selenocysteine insertion sequence binding	2/1709	3/18253	0.024646	1
6	GO:1901682	MF	sulfur compound transmembrane transporter activity	6/1709	25/18253	0.0249864	1
15	GO:0008201	MF	heparin binding	15/1709	90/18253	0.0270573	1
12	GO:0046332	MF	SMAD binding	12/1709	66/18253	0.0302314	1
44	GO:0008047	MF	enzyme activator activity	44/1709	341/18253	0.0302777	1
99	GO:0016772	MF	transferase activity, transferring phosphorus-containing groups	99/1709	862/18253	0.0310108	1
3	GO:0005521	MF	lamin binding	3/1709	8/18253	0.0320285	1
3	GO:0016832	MF	aldehyde-lyase activity	3/1709	8/18253	0.0320285	1
3	GO:0070700	MF	BMP receptor binding	3/1709	8/18253	0.0320285	1
3	GO:0001222	MF	transcription corepressor binding	3/1709	8/18253	0.0320285	1
3	GO:0016840	MF	carbon-nitrogen lyase activity	3/1709	8/18253	0.0320285	1
3	GO:0035259	MF	glucocorticoid receptor binding	3/1709	8/18253	0.0320285	1
3	GO:0030159	MF	receptor signaling complex scaffold activity	3/1709	8/18253	0.0320285	1
3	GO:0016861	MF	intramolecular oxidoreductase activity, interconverting aldoses and ketoses	3/1709	8/18253	0.0320285	1
3	GO:0008525	MF	phosphatidylcholine transporter activity	3/1709	8/18253	0.0320285	1
3	GO:0005243	MF	gap junction channel activity	3/1709	8/18253	0.0320285	1
5	GO:0008519	MF	ammonium transmembrane transporter activity	5/1709	20/18253	0.0336684	1
5	GO:0019200	MF	carbohydrate kinase activity	5/1709	20/18253	0.0336684	1
5	GO:0035035	MF	histone acetyltransferase binding	5/1709	20/18253	0.0336684	1
25	GO:0000287	MF	magnesium ion binding	25/1709	174/18253	0.0349113	1
22	GO:0050662	MF	coenzyme binding	22/1709	152/18253	0.0355723	1
6	GO:0005158	MF	insulin receptor binding	6/1709	27/18253	0.0355954	1
4	GO:0008252	MF	nucleotidase activity	4/1709	14/18253	0.0357096	1
9	GO:0015370	MF	solute:sodium symporter activity	9/1709	47/18253	0.0381374	1
54	GO:0046982	MF	protein heterodimerization activity	54/1709	441/18253	0.0385589	1
182	GO:0003677	MF	DNA binding	182/1709	1689/18253	0.0392616	1
120	GO:0042802	MF	identical protein binding	120/1709	1075/18253	0.0401739	1
51	GO:0008134	MF	transcription factor binding	51/1709	414/18253	0.0404353	1
5	GO:0030332	MF	cyclin binding	5/1709	21/18253	0.0408884	1
9	GO:0016879	MF	ligase activity, forming carbon-nitrogen bonds	9/1709	48/18253	0.0409632	1
16	GO:0019838	MF	growth factor binding	16/1709	105/18253	0.0438506	1
3	GO:0039706	MF	co-receptor binding	3/1709	9/18253	0.0447612	1
3	GO:0070402	MF	NADPH binding	3/1709	9/18253	0.0447612	1
3	GO:0031690	MF	adrenergic receptor binding	3/1709	9/18253	0.0447612	1
3	GO:0016884	MF	carbon-nitrogen ligase activity, with glutamine as amido-N-donor	3/1709	9/18253	0.0447612	1
3	GO:0005247	MF	voltage-gated chloride channel activity	3/1709	9/18253	0.0447612	1
4	GO:0034237	MF	protein kinase A regulatory subunit binding	4/1709	15/18253	0.0451857	1
4	GO:0005545	MF	1-phosphatidylinositol binding	4/1709	15/18253	0.0451857	1
3	GO:0016247	MF	channel regulator activity	3/1709	92/18253	0.0460884	1
2	GO:0017034	MF	Rap guanyl-nucleotide exchange factor activity	2/1709	4/18253	0.0462439	1
2	GO:0033300	MF	dehydroascorbic acid transporter activity	2/1709	4/18253	0.0462439	1
2	GO:0016899	MF	oxidoreductase activity, acting on the CH-OH group of donors, oxygen as acceptor	2/1709	4/18253	0.0462439	1
2	GO:0004526	MF	ribonuclease P activity	2/1709	4/18253	0.0462439	1
2	GO:0015226	MF	carnitine transmembrane transporter activity	2/1709	4/18253	0.0462439	1
2	GO:0089720	MF	caspase binding	2/1709	4/18253	0.0462439	1
2	GO:0015181	MF	arginine transmembrane transporter activity	2/1709	4/18253	0.0462439	1
2	GO:0016635	MF	oxidoreductase activity, acting on the CH-CH group of donors, quinone or related compound as acceptor	2/1709	4/18253	0.0462439	1
2	GO:0004457	MF	lactate dehydrogenase activity	2/1709	4/18253	0.0462439	1
2	GO:0009008	MF	DNA-methyltransferase activity	2/1709	4/18253	0.0462439	1
2	GO:2001069	MF	glycogen binding	2/1709	4/18253	0.0462439	1
2	GO:0015199	MF	amino-acid betaine transmembrane transporter activity	2/1709	4/18253	0.0462439	1
5	GO:0005328	MF	neurotransmitter:sodium symporter activity	5/1709	22/18253	0.0489737	1
5	GO:0070412	MF	R-SMAD binding	5/1709	22/18253	0.0489737	1
19	GO:0020037	MF	heme binding	19/1709	131/18253	0.0496165	1
