# Supplementary material for: RNA-Seq based transcriptome analysis during bovine viral diarrhoea virus (BVDV) infection
Source: BMC Genomics. 2019 Oct 24;20:774. doi: 10.1186/s12864-019-6120-4 (PMC6813989; doi:10.1186/s12864-019-6120-4)
Supplement: Supplementary file 5 — Additional file 5. DEGs identified in comparison group Mock vs. MBV12h. [file 12864_2019_6120_MOESM5_ESM.xls]

## Sheet: KEGG富集分析统计表
Num	Term	Pathway id	Database	Ratio_in_study	Ratio_in_pop	Pvalue_uncorrected	Pvalue_corrected
31	Ribosome biogenesis in eukaryotes	map03008	KEGG PATHWAY	31/1900	72/11808	4.98238e-08	1.47478e-05
12	Steroid biosynthesis	map00100	KEGG PATHWAY	12/1900	19/11808	4.83204e-06	0.000715142
44	Purine metabolism	map00230	KEGG PATHWAY	44/1900	156/11808	8.55408e-05	0.00844003
29	Pyrimidine metabolism	map00240	KEGG PATHWAY	29/1900	93/11808	0.000209472	0.0155009
40	RNA transport	map03013	KEGG PATHWAY	40/1900	148/11808	0.000462396	0.0273738
29	Toxoplasmosis	map05145	KEGG PATHWAY	29/1900	100/11808	0.000800555	0.0338521
21	p53 signaling pathway	map04115	KEGG PATHWAY	21/1900	64/11808	0.000717536	0.0353984
23	TGF-beta signaling pathway	map04350	KEGG PATHWAY	23/1900	75/11808	0.00117815	0.0435916
12	DNA replication	map03030	KEGG PATHWAY	12/1900	30/11808	0.00146543	0.0481964
9	Terpenoid backbone biosynthesis	map00900	KEGG PATHWAY	9/1900	20/11808	0.00218995	0.0648224
10	Glyoxylate and dicarboxylate metabolism	map00630	KEGG PATHWAY	10/1900	26/11808	0.00503628	0.124228
36	Phagosome	map04145	KEGG PATHWAY	36/1900	146/11808	0.00476266	0.128159
19	Leishmaniasis	map05140	KEGG PATHWAY	19/1900	66/11808	0.00656202	0.149412
16	Colorectal cancer	map05210	KEGG PATHWAY	16/1900	53/11808	0.00742228	0.156928
28	FoxO signaling pathway	map04068	KEGG PATHWAY	28/1900	112/11808	0.00977155	0.192825
10	RNA polymerase	map03020	KEGG PATHWAY	10/1900	29/11808	0.0120147	0.209196
20	Small cell lung cancer	map05222	KEGG PATHWAY	20/1900	75/11808	0.0131538	0.216308
50	Human T-cell leukemia virus 1 infection	map05166	KEGG PATHWAY	50/1900	228/11808	0.0119998	0.221997
23	AGE-RAGE signaling pathway in diabetic complications	map04933	KEGG PATHWAY	23/1900	91/11808	0.0158541	0.24699
14	Staphylococcus aureus infection	map05150	KEGG PATHWAY	14/1900	49/11808	0.0194196	0.287411
12	Glycine, serine and threonine metabolism	map00260	KEGG PATHWAY	12/1900	41/11808	0.0243576	0.32772
7	Mismatch repair	map03430	KEGG PATHWAY	7/1900	19/11808	0.0233931	0.329731
29	Hippo signaling pathway	map04390	KEGG PATHWAY	29/1900	127/11808	0.0290411	0.373747
25	Cell cycle	map04110	KEGG PATHWAY	25/1900	108/11808	0.0348721	0.430089
7	Vitamin digestion and absorption	map04977	KEGG PATHWAY	7/1900	21/11808	0.0403783	0.478079
15	Viral myocarditis	map05416	KEGG PATHWAY	15/1900	59/11808	0.0434692	0.49488
15	Inflammatory bowel disease (IBD)	map05321	KEGG PATHWAY	15/1900	60/11808	0.0496577	0.544395
13	Legionellosis	map05134	KEGG PATHWAY	13/1900	51/11808	0.0565276	0.557739
36	Proteoglycans in cancer	map05205	KEGG PATHWAY	36/1900	173/11808	0.0585795	0.55934
11	Intestinal immune network for IgA production	map04672	KEGG PATHWAY	11/1900	41/11808	0.0548903	0.56026
36	Herpes simplex infection	map05168	KEGG PATHWAY	36/1900	172/11808	0.0545203	0.576358
7	Biosynthesis of unsaturated fatty acids	map01040	KEGG PATHWAY	7/1900	23/11808	0.0638241	0.590373
8	Base excision repair	map03410	KEGG PATHWAY	8/1900	28/11808	0.0686425	0.615703
32	Influenza A	map05164	KEGG PATHWAY	32/1900	154/11808	0.0723339	0.629731
16	Platinum drug resistance	map01524	KEGG PATHWAY	16/1900	70/11808	0.0875319	0.719707
17	Complement and coagulation cascades	map04610	KEGG PATHWAY	17/1900	75/11808	0.0852436	0.720917
18	IL-17 signaling pathway	map04657	KEGG PATHWAY	18/1900	81/11808	0.0913046	0.730437
27	Hepatitis B	map05161	KEGG PATHWAY	27/1900	133/11808	0.115003	0.756462
7	Nicotinate and nicotinamide metabolism	map00760	KEGG PATHWAY	7/1900	27/11808	0.130925	0.75988
4	Fatty acid biosynthesis	map00061	KEGG PATHWAY	4/1900	12/11808	0.113096	0.760825
10	Cysteine and methionine metabolism	map00270	KEGG PATHWAY	10/1900	40/11808	0.0977039	0.761062
18	HIF-1 signaling pathway	map04066	KEGG PATHWAY	18/1900	87/11808	0.152589	0.765534
22	Osteoclast differentiation	map04380	KEGG PATHWAY	22/1900	107/11808	0.130101	0.770196
9	Drug metabolism - other enzymes	map00983	KEGG PATHWAY	9/1900	36/11808	0.112687	0.775709
14	Mitophagy - animal	map04137	KEGG PATHWAY	14/1900	61/11808	0.102426	0.777388
10	Nucleotide excision repair	map03420	KEGG PATHWAY	10/1900	42/11808	0.126368	0.779267
24	Measles	map05162	KEGG PATHWAY	24/1900	118/11808	0.129186	0.780392
3	Vitamin B6 metabolism	map00750	KEGG PATHWAY	3/1900	8/11808	0.124169	0.781999
32	Tuberculosis	map05152	KEGG PATHWAY	32/1900	164/11808	0.137761	0.784178
10	Basal cell carcinoma	map05217	KEGG PATHWAY	10/1900	44/11808	0.159078	0.784787
7	Asthma	map05310	KEGG PATHWAY	7/1900	28/11808	0.151686	0.787704
7	Propanoate metabolism	map00640	KEGG PATHWAY	7/1900	28/11808	0.151686	0.787704
17	Rheumatoid arthritis	map05323	KEGG PATHWAY	17/1900	81/11808	0.146775	0.789918
31	Focal adhesion	map04510	KEGG PATHWAY	31/1900	155/11808	0.112493	0.792808
5	One carbon pool by folate	map00670	KEGG PATHWAY	5/1900	18/11808	0.150738	0.79676
2	Valine, leucine and isoleucine biosynthesis	map00290	KEGG PATHWAY	2/1900	4/11808	0.124	0.797915
15	ECM-receptor interaction	map04512	KEGG PATHWAY	15/1900	70/11808	0.145895	0.799721
6	Mannose type O-glycan biosynthesis	map00515	KEGG PATHWAY	6/1900	21/11808	0.108113	0.800037
4	Glycosaminoglycan biosynthesis - keratan sulfate	map00533	KEGG PATHWAY	4/1900	13/11808	0.1435	0.801434
7	Glycosphingolipid biosynthesis - lacto and neolacto series	map00601	KEGG PATHWAY	7/1900	26/11808	0.111687	0.806323
15	Salmonella infection	map05132	KEGG PATHWAY	15/1900	72/11808	0.172738	0.811595
24	Wnt signaling pathway	map04310	KEGG PATHWAY	24/1900	122/11808	0.168161	0.815996
14	ErbB signaling pathway	map04012	KEGG PATHWAY	14/1900	67/11808	0.180218	0.820685
13	Inositol phosphate metabolism	map00562	KEGG PATHWAY	13/1900	61/11808	0.172526	0.82367
12	Arrhythmogenic right ventricular cardiomyopathy (ARVC)	map05412	KEGG PATHWAY	12/1900	56/11808	0.179803	0.83159
19	TNF signaling pathway	map04668	KEGG PATHWAY	19/1900	97/11808	0.207887	0.842939
9	Mineral absorption	map04978	KEGG PATHWAY	9/1900	41/11808	0.203939	0.850225
9	Endometrial cancer	map05213	KEGG PATHWAY	9/1900	41/11808	0.203939	0.850225
8	Homologous recombination	map03440	KEGG PATHWAY	8/1900	35/11808	0.19053	0.8545
29	NOD-like receptor signaling pathway	map04621	KEGG PATHWAY	29/1900	154/11808	0.203439	0.860258
10	Valine, leucine and isoleucine degradation	map00280	KEGG PATHWAY	10/1900	46/11808	0.195498	0.863692
39	MAPK signaling pathway	map04010	KEGG PATHWAY	39/1900	212/11808	0.202079	0.86689
28	Axon guidance	map04360	KEGG PATHWAY	28/1900	148/11808	0.201089	0.875327
7	beta-Alanine metabolism	map00410	KEGG PATHWAY	7/1900	31/11808	0.221952	0.887809
7	Apoptosis - multiple species	map04215	KEGG PATHWAY	7/1900	31/11808	0.221952	0.887809
19	Th17 cell differentiation	map04659	KEGG PATHWAY	19/1900	99/11808	0.235359	0.893156
19	Chagas disease (American trypanosomiasis)	map05142	KEGG PATHWAY	19/1900	99/11808	0.235359	0.893156
10	Malaria	map05144	KEGG PATHWAY	10/1900	48/11808	0.235153	0.903965
23	Signaling pathways regulating pluripotency of stem cells	map04550	KEGG PATHWAY	23/1900	122/11808	0.234456	0.913145
2	Phosphonate and phosphinate metabolism	map00440	KEGG PATHWAY	2/1900	6/11808	0.24937	0.922668
12	EGFR tyrosine kinase inhibitor resistance	map01521	KEGG PATHWAY	12/1900	61/11808	0.269652	0.928104
23	Apoptosis	map04210	KEGG PATHWAY	23/1900	124/11808	0.260338	0.928434
11	Chronic myeloid leukemia	map05220	KEGG PATHWAY	11/1900	57/11808	0.304769	0.930018
3	Sulfur metabolism	map00920	KEGG PATHWAY	3/1900	12/11808	0.302158	0.931654
13	Antigen processing and presentation	map04612	KEGG PATHWAY	13/1900	67/11808	0.274916	0.935348
28	Calcium signaling pathway	map04020	KEGG PATHWAY	28/1900	154/11808	0.268984	0.936699
13	Hypertrophic cardiomyopathy (HCM)	map05410	KEGG PATHWAY	13/1900	66/11808	0.256542	0.937487
15	mRNA surveillance pathway	map03015	KEGG PATHWAY	15/1900	78/11808	0.266175	0.93795
6	Fatty acid elongation	map00062	KEGG PATHWAY	6/1900	27/11808	0.260062	0.938759
9	Arginine and proline metabolism	map00330	KEGG PATHWAY	9/1900	45/11808	0.292843	0.94219
59	Pathways in cancer	map05200	KEGG PATHWAY	59/1900	341/11808	0.289764	0.942528
13	Pertussis	map05133	KEGG PATHWAY	13/1900	69/11808	0.312847	0.944926
7	Antifolate resistance	map01523	KEGG PATHWAY	7/1900	34/11808	0.301187	0.948419
7	Porphyrin and chlorophyll metabolism	map00860	KEGG PATHWAY	7/1900	34/11808	0.301187	0.948419
6	Pentose phosphate pathway	map00030	KEGG PATHWAY	6/1900	28/11808	0.289619	0.952524
15	Th1 and Th2 cell differentiation	map04658	KEGG PATHWAY	15/1900	79/11808	0.283299	0.952916
10	Pancreatic cancer	map05212	KEGG PATHWAY	10/1900	51/11808	0.299422	0.952998
16	Glycerophospholipid metabolism	map00564	KEGG PATHWAY	16/1900	85/11808	0.286665	0.953403
6	Starch and sucrose metabolism	map00500	KEGG PATHWAY	6/1900	29/11808	0.319816	0.956217
12	Aldosterone synthesis and secretion	map04925	KEGG PATHWAY	12/1900	64/11808	0.329472	0.965581
4	Glycosaminoglycan biosynthesis - chondroitin sulfate / dermatan sulfate	map00532	KEGG PATHWAY	4/1900	18/11808	0.326787	0.96729
13	RNA degradation	map03018	KEGG PATHWAY	13/1900	71/11808	0.351998	1
4	Dorso-ventral axis formation	map04320	KEGG PATHWAY	4/1900	19/11808	0.366184	1
23	Fluid shear stress and atherosclerosis	map05418	KEGG PATHWAY	23/1900	132/11808	0.372983	1
15	Phosphatidylinositol signaling system	map04070	KEGG PATHWAY	15/1900	84/11808	0.373234	1
17	Toll-like receptor signaling pathway	map04620	KEGG PATHWAY	17/1900	96/11808	0.373811	1
2	Sulfur relay system	map04122	KEGG PATHWAY	2/1900	8/11808	0.377282	1
8	Allograft rejection	map05330	KEGG PATHWAY	8/1900	43/11808	0.38766	1
13	Gap junction	map04540	KEGG PATHWAY	13/1900	73/11808	0.39193	1
3	Glycosphingolipid biosynthesis - globo and isoglobo series	map00603	KEGG PATHWAY	3/1900	14/11808	0.39696	1
26	Systemic lupus erythematosus	map05322	KEGG PATHWAY	26/1900	152/11808	0.399533	1
20	Insulin signaling pathway	map04910	KEGG PATHWAY	20/1900	116/11808	0.405656	1
30	Epstein-Barr virus infection	map05169	KEGG PATHWAY	30/1900	177/11808	0.408422	1
1	Biotin metabolism	map00780	KEGG PATHWAY	1/1900	3/11808	0.409244	1
12	Dilated cardiomyopathy (DCM)	map05414	KEGG PATHWAY	12/1900	68/11808	0.412749	1
10	Adherens junction	map04520	KEGG PATHWAY	10/1900	56/11808	0.413762	1
2	Synthesis and degradation of ketone bodies	map00072	KEGG PATHWAY	2/1900	9/11808	0.437968	1
8	Amyotrophic lateral sclerosis (ALS)	map05014	KEGG PATHWAY	8/1900	45/11808	0.440057	1
7	Graft-versus-host disease	map05332	KEGG PATHWAY	7/1900	39/11808	0.441512	1
7	Ferroptosis	map04216	KEGG PATHWAY	7/1900	39/11808	0.441512	1
7	Hedgehog signaling pathway	map04340	KEGG PATHWAY	7/1900	39/11808	0.441512	1
6	Bladder cancer	map05219	KEGG PATHWAY	6/1900	33/11808	0.442813	1
3	Primary bile acid biosynthesis	map00120	KEGG PATHWAY	3/1900	15/11808	0.443174	1
3	Thiamine metabolism	map00730	KEGG PATHWAY	3/1900	15/11808	0.443174	1
5	Circadian rhythm	map04710	KEGG PATHWAY	5/1900	27/11808	0.443814	1
5	Primary immunodeficiency	map05340	KEGG PATHWAY	5/1900	27/11808	0.443814	1
4	Glycosylphosphatidylinositol (GPI)-anchor biosynthesis	map00563	KEGG PATHWAY	4/1900	21/11808	0.444202	1
19	Breast cancer	map05224	KEGG PATHWAY	19/1900	113/11808	0.456177	1
19	AMPK signaling pathway	map04152	KEGG PATHWAY	19/1900	113/11808	0.456177	1
8	Acute myeloid leukemia	map05221	KEGG PATHWAY	8/1900	46/11808	0.466065	1
15	Hematopoietic cell lineage	map04640	KEGG PATHWAY	15/1900	89/11808	0.466433	1
13	Peroxisome	map04146	KEGG PATHWAY	13/1900	77/11808	0.472405	1
36	Endocytosis	map04144	KEGG PATHWAY	36/1900	219/11808	0.472623	1
5	Mucin type O-glycan biosynthesis	map00512	KEGG PATHWAY	5/1900	28/11808	0.477335	1
20	Spliceosome	map03040	KEGG PATHWAY	20/1900	121/11808	0.485956	1
3	Selenocompound metabolism	map00450	KEGG PATHWAY	3/1900	16/11808	0.48792	1
14	Choline metabolism in cancer	map05231	KEGG PATHWAY	14/1900	84/11808	0.488551	1
24	Transcriptional misregulation in cancer	map05202	KEGG PATHWAY	24/1900	147/11808	0.503833	1
1	Caffeine metabolism	map00232	KEGG PATHWAY	1/1900	4/11808	0.504326	1
22	mTOR signaling pathway	map04150	KEGG PATHWAY	22/1900	135/11808	0.51047	1
9	Melanoma	map05218	KEGG PATHWAY	9/1900	54/11808	0.51113	1
8	Glutathione metabolism	map00480	KEGG PATHWAY	8/1900	48/11808	0.517186	1
11	Adipocytokine signaling pathway	map04920	KEGG PATHWAY	11/1900	67/11808	0.522317	1
3	Pantothenate and CoA biosynthesis	map00770	KEGG PATHWAY	3/1900	17/11808	0.530831	1
13	Estrogen signaling pathway	map04915	KEGG PATHWAY	13/1900	80/11808	0.531699	1
22	cGMP-PKG signaling pathway	map04022	KEGG PATHWAY	22/1900	137/11808	0.540457	1
8	Glioma	map05214	KEGG PATHWAY	8/1900	49/11808	0.542119	1
17	Platelet activation	map04611	KEGG PATHWAY	17/1900	106/11808	0.547116	1
7	Fanconi anemia pathway	map03460	KEGG PATHWAY	7/1900	43/11808	0.550653	1
4	Pentose and glucuronate interconversions	map00040	KEGG PATHWAY	4/1900	24/11808	0.554592	1
15	Inflammatory mediator regulation of TRP channels	map04750	KEGG PATHWAY	15/1900	94/11808	0.557741	1
9	Central carbon metabolism in cancer	map05230	KEGG PATHWAY	9/1900	56/11808	0.55788	1
6	Pyruvate metabolism	map00620	KEGG PATHWAY	6/1900	37/11808	0.56073	1
3	Phenylalanine metabolism	map00360	KEGG PATHWAY	3/1900	18/11808	0.57164	1
5	Fructose and mannose metabolism	map00051	KEGG PATHWAY	5/1900	31/11808	0.573021	1
1	Phenylalanine, tyrosine and tryptophan biosynthesis	map00400	KEGG PATHWAY	1/1900	5/11808	0.584111	1
11	Progesterone-mediated oocyte maturation	map04914	KEGG PATHWAY	11/1900	70/11808	0.584676	1
27	Regulation of actin cytoskeleton	map04810	KEGG PATHWAY	27/1900	172/11808	0.588606	1
4	Thyroid cancer	map05216	KEGG PATHWAY	4/1900	25/11808	0.58871	1
4	Renin-angiotensin system	map04614	KEGG PATHWAY	4/1900	25/11808	0.58871	1
9	B cell receptor signaling pathway	map04662	KEGG PATHWAY	9/1900	58/11808	0.602685	1
9	Glycolysis / Gluconeogenesis	map00010	KEGG PATHWAY	9/1900	58/11808	0.602685	1
15	Oocyte meiosis	map04114	KEGG PATHWAY	15/1900	97/11808	0.609779	1
3	Protein export	map03060	KEGG PATHWAY	3/1900	19/11808	0.610164	1
48	PI3K-Akt signaling pathway	map04151	KEGG PATHWAY	48/1900	309/11808	0.630583	1
5	African trypanosomiasis	map05143	KEGG PATHWAY	5/1900	33/11808	0.631388	1
23	Tight junction	map04530	KEGG PATHWAY	23/1900	150/11808	0.634606	1
20	Cell adhesion molecules (CAMs)	map04514	KEGG PATHWAY	20/1900	131/11808	0.63844	1
22	Protein processing in endoplasmic reticulum	map04141	KEGG PATHWAY	22/1900	144/11808	0.640282	1
15	Leukocyte transendothelial migration	map04670	KEGG PATHWAY	15/1900	99/11808	0.642859	1
2	Folate biosynthesis	map00790	KEGG PATHWAY	2/1900	13/11808	0.643104	1
11	Prolactin signaling pathway	map04917	KEGG PATHWAY	11/1900	73/11808	0.643187	1
3	Glycosaminoglycan biosynthesis - heparan sulfate / heparin	map00534	KEGG PATHWAY	3/1900	20/11808	0.646291	1
10	PPAR signaling pathway	map03320	KEGG PATHWAY	10/1900	67/11808	0.653672	1
8	Autoimmune thyroid disease	map05320	KEGG PATHWAY	8/1900	54/11808	0.65767	1
19	Apelin signaling pathway	map04371	KEGG PATHWAY	19/1900	126/11808	0.659087	1
18	Oxytocin signaling pathway	map04921	KEGG PATHWAY	18/1900	120/11808	0.666053	1
10	Prostate cancer	map05215	KEGG PATHWAY	10/1900	68/11808	0.672674	1
7	Type I diabetes mellitus	map04940	KEGG PATHWAY	7/1900	49/11808	0.693739	1
18	Autophagy - animal	map04140	KEGG PATHWAY	18/1900	122/11808	0.69404	1
9	Chemical carcinogenesis	map05204	KEGG PATHWAY	9/1900	63/11808	0.703755	1
4	Galactose metabolism	map00052	KEGG PATHWAY	4/1900	29/11808	0.708598	1
6	Aminoacyl-tRNA biosynthesis	map00970	KEGG PATHWAY	6/1900	43/11808	0.71138	1
14	Thyroid hormone signaling pathway	map04919	KEGG PATHWAY	14/1900	97/11808	0.713579	1
11	Endocrine resistance	map01522	KEGG PATHWAY	11/1900	78/11808	0.729913	1
5	Notch signaling pathway	map04330	KEGG PATHWAY	5/1900	37/11808	0.732382	1
5	Fat digestion and absorption	map04975	KEGG PATHWAY	5/1900	37/11808	0.732382	1
6	ABC transporters	map02010	KEGG PATHWAY	6/1900	44/11808	0.732672	1
7	Long-term potentiation	map04720	KEGG PATHWAY	7/1900	51/11808	0.734192	1
16	Dopaminergic synapse	map04728	KEGG PATHWAY	16/1900	112/11808	0.737143	1
13	Natural killer cell mediated cytotoxicity	map04650	KEGG PATHWAY	13/1900	93/11808	0.752241	1
6	Amino sugar and nucleotide sugar metabolism	map00520	KEGG PATHWAY	6/1900	45/11808	0.752827	1
6	N-Glycan biosynthesis	map00510	KEGG PATHWAY	6/1900	45/11808	0.752827	1
7	Renal cell carcinoma	map05211	KEGG PATHWAY	7/1900	52/11808	0.752966	1
7	Amphetamine addiction	map05031	KEGG PATHWAY	7/1900	52/11808	0.752966	1
8	Cytosolic DNA-sensing pathway	map04623	KEGG PATHWAY	8/1900	59/11808	0.754067	1
14	Insulin resistance	map04931	KEGG PATHWAY	14/1900	100/11808	0.755689	1
3	alpha-Linolenic acid metabolism	map00592	KEGG PATHWAY	3/1900	24/11808	0.766529	1
7	Steroid hormone biosynthesis	map00140	KEGG PATHWAY	7/1900	53/11808	0.770771	1
9	Fc gamma R-mediated phagocytosis	map04666	KEGG PATHWAY	9/1900	67/11808	0.771651	1
15	Sphingolipid signaling pathway	map04071	KEGG PATHWAY	15/1900	108/11808	0.771706	1
6	Non-small cell lung cancer	map05223	KEGG PATHWAY	6/1900	46/11808	0.77185	1
5	Tryptophan metabolism	map00380	KEGG PATHWAY	5/1900	39/11808	0.774664	1
12	T cell receptor signaling pathway	map04660	KEGG PATHWAY	12/1900	88/11808	0.776775	1
14	Neurotrophin signaling pathway	map04722	KEGG PATHWAY	14/1900	102/11808	0.78135	1
3	Maturity onset diabetes of the young	map04950	KEGG PATHWAY	3/1900	25/11808	0.790777	1
4	Alanine, aspartate and glutamate metabolism	map00250	KEGG PATHWAY	4/1900	33/11808	0.800813	1
2	Arginine biosynthesis	map00220	KEGG PATHWAY	2/1900	18/11808	0.810938	1
5	Fatty acid degradation	map00071	KEGG PATHWAY	5/1900	41/11808	0.811625	1
5	Ether lipid metabolism	map00565	KEGG PATHWAY	5/1900	41/11808	0.811625	1
16	Hepatitis C	map05160	KEGG PATHWAY	16/1900	119/11808	0.818778	1
6	Retinol metabolism	map00830	KEGG PATHWAY	6/1900	49/11808	0.822311	1
11	Amoebiasis	map05146	KEGG PATHWAY	11/1900	85/11808	0.825984	1
10	Longevity regulating pathway	map04211	KEGG PATHWAY	10/1900	78/11808	0.826502	1
13	Vascular smooth muscle contraction	map04270	KEGG PATHWAY	13/1900	100/11808	0.836803	1
11	NF-kappa B signaling pathway	map04064	KEGG PATHWAY	11/1900	86/11808	0.837301	1
12	Protein digestion and absorption	map04974	KEGG PATHWAY	12/1900	94/11808	0.847242	1
6	Glycerolipid metabolism	map00561	KEGG PATHWAY	6/1900	51/11808	0.85073	1
2	Hippo signaling pathway - multiple species	map04392	KEGG PATHWAY	2/1900	20/11808	0.855478	1
2	Histidine metabolism	map00340	KEGG PATHWAY	2/1900	20/11808	0.855478	1
23	Huntington disease	map05016	KEGG PATHWAY	23/1900	172/11808	0.861515	1
16	Ubiquitin mediated proteolysis	map04120	KEGG PATHWAY	16/1900	124/11808	0.864576	1
18	Ribosome	map03010	KEGG PATHWAY	18/1900	138/11808	0.86506	1
8	Bacterial invasion of epithelial cells	map05100	KEGG PATHWAY	8/1900	67/11808	0.865345	1
5	VEGF signaling pathway	map04370	KEGG PATHWAY	5/1900	45/11808	0.870912	1
6	Metabolism of xenobiotics by cytochrome P450	map00980	KEGG PATHWAY	6/1900	53/11808	0.875318	1
6	Longevity regulating pathway - multiple species	map04213	KEGG PATHWAY	6/1900	53/11808	0.875318	1
4	Endocrine and other factor-regulated calcium reabsorption	map04961	KEGG PATHWAY	4/1900	38/11808	0.881224	1
3	Autophagy - other	map04136	KEGG PATHWAY	3/1900	30/11808	0.882481	1
3	Citrate cycle (TCA cycle)	map00020	KEGG PATHWAY	3/1900	30/11808	0.882481	1
2	Proximal tubule bicarbonate reclamation	map04964	KEGG PATHWAY	2/1900	22/11808	0.890226	1
7	Thyroid hormone synthesis	map04918	KEGG PATHWAY	7/1900	62/11808	0.890341	1
32	MicroRNAs in cancer	map05206	KEGG PATHWAY	32/1900	239/11808	0.894198	1
3	Tyrosine metabolism	map00350	KEGG PATHWAY	3/1900	31/11808	0.895808	1
1	Non-homologous end-joining	map03450	KEGG PATHWAY	1/1900	13/11808	0.897912	1
22	cAMP signaling pathway	map04024	KEGG PATHWAY	22/1900	171/11808	0.899234	1
6	Fc epsilon RI signaling pathway	map04664	KEGG PATHWAY	6/1900	56/11808	0.905766	1
3	Linoleic acid metabolism	map00591	KEGG PATHWAY	3/1900	32/11808	0.90776	1
2	Collecting duct acid secretion	map04966	KEGG PATHWAY	2/1900	24/11808	0.917076	1
26	Viral carcinogenesis	map05203	KEGG PATHWAY	26/1900	203/11808	0.919626	1
3	Aldosterone-regulated sodium reabsorption	map04960	KEGG PATHWAY	3/1900	34/11808	0.928005	1
8	GnRH signaling pathway	map04912	KEGG PATHWAY	8/1900	75/11808	0.931777	1
4	Cocaine addiction	map05030	KEGG PATHWAY	4/1900	43/11808	0.931798	1
4	Type II diabetes mellitus	map04930	KEGG PATHWAY	4/1900	43/11808	0.931798	1
2	Butanoate metabolism	map00650	KEGG PATHWAY	2/1900	26/11808	0.937656	1
9	Melanogenesis	map04916	KEGG PATHWAY	9/1900	84/11808	0.939119	1
1	Nitrogen metabolism	map00910	KEGG PATHWAY	1/1900	16/11808	0.939729	1
5	Drug metabolism - cytochrome P450	map00982	KEGG PATHWAY	5/1900	53/11808	0.943321	1
6	Taste transduction	map04742	KEGG PATHWAY	6/1900	63/11808	0.952981	1
9	Glucagon signaling pathway	map04922	KEGG PATHWAY	9/1900	87/11808	0.953265	1
22	Alcoholism	map05034	KEGG PATHWAY	22/1900	184/11808	0.95387	1
5	Lysine degradation	map00310	KEGG PATHWAY	5/1900	55/11808	0.954414	1
13	Adrenergic signaling in cardiomyocytes	map04261	KEGG PATHWAY	13/1900	118/11808	0.954595	1
1	Other types of O-glycan biosynthesis	map00514	KEGG PATHWAY	1/1900	18/11808	0.957588	1
29	Cytokine-cytokine receptor interaction	map04060	KEGG PATHWAY	29/1900	236/11808	0.958871	1
18	Alzheimer disease	map05010	KEGG PATHWAY	18/1900	157/11808	0.960109	1
8	RIG-I-like receptor signaling pathway	map04622	KEGG PATHWAY	8/1900	81/11808	0.960778	1
1	Ascorbate and aldarate metabolism	map00053	KEGG PATHWAY	1/1900	19/11808	0.964422	1
20	Rap1 signaling pathway	map04015	KEGG PATHWAY	20/1900	174/11808	0.96595	1
12	Lysosome	map04142	KEGG PATHWAY	12/1900	114/11808	0.966144	1
5	Renin secretion	map04924	KEGG PATHWAY	5/1900	58/11808	0.967378	1
9	Glutamatergic synapse	map04724	KEGG PATHWAY	9/1900	91/11808	0.96756	1
10	Serotonergic synapse	map04726	KEGG PATHWAY	10/1900	99/11808	0.967792	1
4	Ovarian steroidogenesis	map04913	KEGG PATHWAY	4/1900	51/11808	0.973624	1
7	Circadian entrainment	map04713	KEGG PATHWAY	7/1900	77/11808	0.974008	1
6	Bile secretion	map04976	KEGG PATHWAY	6/1900	69/11808	0.97512	1
15	Non-alcoholic fatty liver disease (NAFLD)	map04932	KEGG PATHWAY	15/1900	143/11808	0.979152	1
3	Sphingolipid metabolism	map00600	KEGG PATHWAY	3/1900	44/11808	0.980514	1
9	Cholinergic synapse	map04725	KEGG PATHWAY	9/1900	97/11808	0.981698	1
3	Long-term depression	map04730	KEGG PATHWAY	3/1900	45/11808	0.982989	1
3	Proteasome	map03050	KEGG PATHWAY	3/1900	45/11808	0.982989	1
1	Phototransduction	map04744	KEGG PATHWAY	1/1900	24/11808	0.985227	1
6	Arachidonic acid metabolism	map00590	KEGG PATHWAY	6/1900	74/11808	0.985718	1
2	Carbohydrate digestion and absorption	map04973	KEGG PATHWAY	2/1900	36/11808	0.985814	1
4	Synaptic vesicle cycle	map04721	KEGG PATHWAY	4/1900	56/11808	0.985886	1
5	Gastric acid secretion	map04971	KEGG PATHWAY	5/1900	66/11808	0.98717	1
7	Pancreatic secretion	map04972	KEGG PATHWAY	7/1900	84/11808	0.987633	1
15	Chemokine signaling pathway	map04062	KEGG PATHWAY	15/1900	151/11808	0.989304	1
6	Insulin secretion	map04911	KEGG PATHWAY	6/1900	77/11808	0.989861	1
3	Regulation of lipolysis in adipocytes	map04923	KEGG PATHWAY	3/1900	49/11808	0.990196	1
11	Phospholipase D signaling pathway	map04072	KEGG PATHWAY	11/1900	120/11808	0.990337	1
21	Ras signaling pathway	map04014	KEGG PATHWAY	21/1900	199/11808	0.990529	1
2	Basal transcription factors	map03022	KEGG PATHWAY	2/1900	39/11808	0.991023	1
13	Parkinson disease	map05012	KEGG PATHWAY	13/1900	141/11808	0.993771	1
1	Nicotine addiction	map05033	KEGG PATHWAY	1/1900	30/11808	0.994857	1
15	Jak-STAT signaling pathway	map04630	KEGG PATHWAY	15/1900	161/11808	0.995589	1
2	Vasopressin-regulated water reabsorption	map04962	KEGG PATHWAY	2/1900	44/11808	0.995855	1
5	Salivary secretion	map04970	KEGG PATHWAY	5/1900	77/11808	0.996718	1
1	SNARE interactions in vesicular transport	map04130	KEGG PATHWAY	1/1900	33/11808	0.996966	1
3	GABAergic synapse	map04727	KEGG PATHWAY	3/1900	72/11808	0.999655	1
3	Morphine addiction	map05032	KEGG PATHWAY	3/1900	79/11808	0.99988	1
7	Retrograde endocannabinoid signaling	map04723	KEGG PATHWAY	7/1900	129/11808	0.999949	1
7	Oxidative phosphorylation	map00190	KEGG PATHWAY	7/1900	131/11808	0.99996	1
1	Cardiac muscle contraction	map04260	KEGG PATHWAY	1/1900	65/11808	0.999989	1
14	Neuroactive ligand-receptor interaction	map04080	KEGG PATHWAY	14/1900	260/11808	1	1
5	Olfactory transduction	map04740	KEGG PATHWAY	5/1900	880/11808	1	1
