# Supplementary material for: RNA-Seq based transcriptome analysis during bovine viral diarrhoea virus (BVDV) infection
Source: BMC Genomics. 2019 Oct 24;20:774. doi: 10.1186/s12864-019-6120-4 (PMC6813989; doi:10.1186/s12864-019-6120-4)
Supplement: Supplementary file 6 — Additional file 6. DEGs identified in comparison group Mock vs. MBV24h. [file 12864_2019_6120_MOESM6_ESM.xls]

## Sheet: KEGG富集分析统计表
Num	Term	Pathway id	Database	Ratio_in_study	Ratio_in_pop	Pvalue_uncorrected	Pvalue_corrected
15	Glycine, serine and threonine metabolism	map00260	KEGG PATHWAY	15/1178	41/11808	4.58737e-06	0.00135328
26	FoxO signaling pathway	map04068	KEGG PATHWAY	26/1178	112/11808	3.10997e-05	0.0045872
42	Human T-cell leukemia virus 1 infection	map05166	KEGG PATHWAY	42/1178	228/11808	6.30939e-05	0.00620423
15	Legionellosis	map05134	KEGG PATHWAY	15/1178	51/11808	8.84871e-05	0.00652593
20	HIF-1 signaling pathway	map04066	KEGG PATHWAY	20/1178	87/11808	0.000284601	0.0167914
20	AGE-RAGE signaling pathway in diabetic complications	map04933	KEGG PATHWAY	20/1178	91/11808	0.00053221	0.026167
12	Basal cell carcinoma	map05217	KEGG PATHWAY	12/1178	44/11808	0.000939964	0.0396128
7	Steroid biosynthesis	map00100	KEGG PATHWAY	7/1178	19/11808	0.00165544	0.0610445
18	TNF signaling pathway	map04668	KEGG PATHWAY	18/1178	97/11808	0.0069089	0.113229
24	mTOR signaling pathway	map04150	KEGG PATHWAY	24/1178	135/11808	0.00359413	0.117808
15	TGF-beta signaling pathway	map04350	KEGG PATHWAY	15/1178	75/11808	0.00649823	0.119811
15	Complement and coagulation cascades	map04610	KEGG PATHWAY	15/1178	75/11808	0.00649823	0.119811
11	Staphylococcus aureus infection	map05150	KEGG PATHWAY	11/1178	49/11808	0.0077403	0.120178
33	MAPK signaling pathway	map04010	KEGG PATHWAY	33/1178	212/11808	0.00649475	0.12773
16	Rheumatoid arthritis	map05323	KEGG PATHWAY	16/1178	81/11808	0.00570915	0.129554
13	Mitophagy - animal	map04137	KEGG PATHWAY	13/1178	61/11808	0.00630801	0.132919
18	Insulin resistance	map04931	KEGG PATHWAY	18/1178	100/11808	0.0094901	0.133313
25	Transcriptional misregulation in cancer	map05202	KEGG PATHWAY	25/1178	147/11808	0.00544992	0.133977
8	Fructose and mannose metabolism	map00051	KEGG PATHWAY	8/1178	31/11808	0.00936222	0.138093
20	Insulin signaling pathway	map04910	KEGG PATHWAY	20/1178	116/11808	0.0104316	0.139879
22	Fluid shear stress and atherosclerosis	map05418	KEGG PATHWAY	22/1178	132/11808	0.0110617	0.141878
10	Arginine and proline metabolism	map00330	KEGG PATHWAY	10/1178	45/11808	0.0116882	0.143668
13	Inflammatory bowel disease (IBD)	map05321	KEGG PATHWAY	13/1178	60/11808	0.00544887	0.146129
25	Phagosome	map04145	KEGG PATHWAY	25/1178	146/11808	0.00498132	0.146949
9	Cysteine and methionine metabolism	map00270	KEGG PATHWAY	9/1178	40/11808	0.0151124	0.178327
20	Autophagy - animal	map04140	KEGG PATHWAY	20/1178	122/11808	0.0177018	0.186501
8	Antifolate resistance	map01523	KEGG PATHWAY	8/1178	34/11808	0.0164947	0.187152
9	Intestinal immune network for IgA production	map04672	KEGG PATHWAY	9/1178	41/11808	0.0176988	0.193376
12	p53 signaling pathway	map04115	KEGG PATHWAY	12/1178	64/11808	0.0229182	0.233133
9	Aminoacyl-tRNA biosynthesis	map00970	KEGG PATHWAY	9/1178	43/11808	0.023813	0.234161
20	Hippo signaling pathway	map04390	KEGG PATHWAY	20/1178	127/11808	0.0263596	0.250842
23	Influenza A	map05164	KEGG PATHWAY	23/1178	154/11808	0.0318752	0.268663
4	Folate biosynthesis	map00790	KEGG PATHWAY	4/1178	13/11808	0.0338144	0.27709
8	Ferroptosis	map04216	KEGG PATHWAY	8/1178	39/11808	0.0359241	0.278884
10	Renal cell carcinoma	map05211	KEGG PATHWAY	10/1178	52/11808	0.0307559	0.283531
14	Phosphatidylinositol signaling system	map04070	KEGG PATHWAY	14/1178	84/11808	0.0375754	0.284224
12	PPAR signaling pathway	map03320	KEGG PATHWAY	12/1178	67/11808	0.031798	0.284255
12	ErbB signaling pathway	map04012	KEGG PATHWAY	12/1178	67/11808	0.031798	0.284255
17	Osteoclast differentiation	map04380	KEGG PATHWAY	17/1178	107/11808	0.035706	0.284683
6	Glyoxylate and dicarboxylate metabolism	map00630	KEGG PATHWAY	6/1178	26/11808	0.0392853	0.289729
14	Amoebiasis	map05146	KEGG PATHWAY	14/1178	85/11808	0.0410231	0.295166
4	Glycosphingolipid biosynthesis - globo and isoglobo series	map00603	KEGG PATHWAY	4/1178	14/11808	0.0437023	0.306957
44	Pathways in cancer	map05200	KEGG PATHWAY	44/1178	341/11808	0.0447533	0.307029
10	Central carbon metabolism in cancer	map05230	KEGG PATHWAY	10/1178	56/11808	0.0483385	0.324087
12	Gap junction	map04540	KEGG PATHWAY	12/1178	73/11808	0.05646	0.333114
18	Signaling pathways regulating pluripotency of stem cells	map04550	KEGG PATHWAY	18/1178	122/11808	0.0585452	0.338644
6	Asthma	map05310	KEGG PATHWAY	6/1178	28/11808	0.0542644	0.340596
2	Lipoic acid metabolism	map00785	KEGG PATHWAY	2/1178	4/11808	0.0520409	0.341157
2	Caffeine metabolism	map00232	KEGG PATHWAY	2/1178	4/11808	0.0520409	0.341157
17	Breast cancer	map05224	KEGG PATHWAY	17/1178	113/11808	0.0556255	0.341865
17	AMPK signaling pathway	map04152	KEGG PATHWAY	17/1178	113/11808	0.0556255	0.341865
7	Drug metabolism - other enzymes	map00983	KEGG PATHWAY	7/1178	36/11808	0.0618869	0.344465
5	Proximal tubule bicarbonate reclamation	map04964	KEGG PATHWAY	5/1178	22/11808	0.0614379	0.348542
8	ABC transporters	map02010	KEGG PATHWAY	8/1178	44/11808	0.0668097	0.358343
11	Adipocytokine signaling pathway	map04920	KEGG PATHWAY	11/1178	67/11808	0.0664461	0.362992
15	Toxoplasmosis	map05145	KEGG PATHWAY	15/1178	100/11808	0.0705675	0.365218
7	Pyruvate metabolism	map00620	KEGG PATHWAY	7/1178	37/11808	0.0700529	0.369029
10	Inositol phosphate metabolism	map00562	KEGG PATHWAY	10/1178	61/11808	0.0784038	0.398778
14	Protein digestion and absorption	map04974	KEGG PATHWAY	14/1178	94/11808	0.082461	0.412305
5	Pentose and glucuronate interconversions	map00040	KEGG PATHWAY	5/1178	24/11808	0.084189	0.413929
23	Herpes simplex infection	map05168	KEGG PATHWAY	23/1178	172/11808	0.0892715	0.431723
4	One carbon pool by folate	map00670	KEGG PATHWAY	4/1178	18/11808	0.0973797	0.463339
14	Thyroid hormone signaling pathway	map04919	KEGG PATHWAY	14/1178	97/11808	0.100709	0.471575
3	Fatty acid biosynthesis	map00061	KEGG PATHWAY	3/1178	12/11808	0.110167	0.5078
10	Leishmaniasis	map05140	KEGG PATHWAY	10/1178	66/11808	0.117944	0.51167
15	Cell cycle	map04110	KEGG PATHWAY	15/1178	108/11808	0.117359	0.516729
4	Dorso-ventral axis formation	map04320	KEGG PATHWAY	4/1178	19/11808	0.114079	0.517745
17	Apelin signaling pathway	map04371	KEGG PATHWAY	17/1178	126/11808	0.12223	0.52258
6	Porphyrin and chlorophyll metabolism	map00860	KEGG PATHWAY	6/1178	34/11808	0.117226	0.523964
5	Nicotinate and nicotinamide metabolism	map00760	KEGG PATHWAY	5/1178	27/11808	0.12538	0.528389
20	NOD-like receptor signaling pathway	map04621	KEGG PATHWAY	20/1178	154/11808	0.132735	0.529146
4	Terpenoid backbone biosynthesis	map00900	KEGG PATHWAY	4/1178	20/11808	0.131935	0.533163
9	Viral myocarditis	map05416	KEGG PATHWAY	9/1178	59/11808	0.129427	0.537761
7	Type II diabetes mellitus	map04930	KEGG PATHWAY	7/1178	43/11808	0.131674	0.539499
6	Notch signaling pathway	map04330	KEGG PATHWAY	6/1178	37/11808	0.158204	0.54906
22	Proteoglycans in cancer	map05205	KEGG PATHWAY	22/1178	173/11808	0.13999	0.550627
5	Starch and sucrose metabolism	map00500	KEGG PATHWAY	5/1178	29/11808	0.157081	0.551654
10	ECM-receptor interaction	map04512	KEGG PATHWAY	10/1178	70/11808	0.156234	0.555288
16	Wnt signaling pathway	map04310	KEGG PATHWAY	16/1178	122/11808	0.155662	0.560004
19	Axon guidance	map04360	KEGG PATHWAY	19/1178	148/11808	0.151304	0.564995
10	Pertussis	map05133	KEGG PATHWAY	10/1178	69/11808	0.146132	0.567223
8	Longevity regulating pathway - multiple species	map04213	KEGG PATHWAY	8/1178	53/11808	0.153874	0.56741
8	Steroid hormone biosynthesis	map00140	KEGG PATHWAY	8/1178	53/11808	0.153874	0.56741
2	Riboflavin metabolism	map00740	KEGG PATHWAY	2/1178	7/11808	0.149064	0.571091
11	Longevity regulating pathway	map04211	KEGG PATHWAY	11/1178	78/11808	0.151161	0.5717
4	Biosynthesis of unsaturated fatty acids	map01040	KEGG PATHWAY	4/1178	23/11808	0.191435	0.620585
1	Lysine biosynthesis	map00300	KEGG PATHWAY	1/1178	2/11808	0.189581	0.621403
2	Vitamin B6 metabolism	map00750	KEGG PATHWAY	2/1178	8/11808	0.186152	0.624032
6	Graft-versus-host disease	map05332	KEGG PATHWAY	6/1178	39/11808	0.188517	0.624861
3	Primary bile acid biosynthesis	map00120	KEGG PATHWAY	3/1178	15/11808	0.183049	0.627901
3	Thiamine metabolism	map00730	KEGG PATHWAY	3/1178	15/11808	0.183049	0.627901
15	Measles	map05162	KEGG PATHWAY	15/1178	118/11808	0.196276	0.629363
11	Choline metabolism in cancer	map05231	KEGG PATHWAY	11/1178	84/11808	0.213373	0.635809
9	Antigen processing and presentation	map04612	KEGG PATHWAY	9/1178	67/11808	0.221374	0.640249
8	Glycolysis / Gluconeogenesis	map00010	KEGG PATHWAY	8/1178	58/11808	0.217948	0.642947
19	Focal adhesion	map04510	KEGG PATHWAY	19/1178	155/11808	0.202844	0.643429
6	Fatty acid degradation	map00071	KEGG PATHWAY	6/1178	41/11808	0.220856	0.645073
7	Regulation of lipolysis in adipocytes	map04923	KEGG PATHWAY	7/1178	49/11808	0.212631	0.646663
7	Retinol metabolism	map00830	KEGG PATHWAY	7/1178	49/11808	0.212631	0.646663
10	Small cell lung cancer	map05222	KEGG PATHWAY	10/1178	75/11808	0.211555	0.650092
19	Purine metabolism	map00230	KEGG PATHWAY	19/1178	156/11808	0.210826	0.654671
5	African trypanosomiasis	map05143	KEGG PATHWAY	5/1178	33/11808	0.228634	0.654826
3	Selenocompound metabolism	map00450	KEGG PATHWAY	3/1178	16/11808	0.209648	0.657937
23	Viral carcinogenesis	map05203	KEGG PATHWAY	23/1178	203/11808	0.290196	0.658522
3	Ascorbate and aldarate metabolism	map00053	KEGG PATHWAY	3/1178	19/11808	0.293232	0.660331
6	VEGF signaling pathway	map04370	KEGG PATHWAY	6/1178	45/11808	0.290166	0.663557
34	PI3K-Akt signaling pathway	map04151	KEGG PATHWAY	34/1178	309/11808	0.297363	0.664562
8	Chemical carcinogenesis	map05204	KEGG PATHWAY	8/1178	63/11808	0.290116	0.668626
11	NF-kappa B signaling pathway	map04064	KEGG PATHWAY	11/1178	86/11808	0.236191	0.669965
4	Propanoate metabolism	map00640	KEGG PATHWAY	4/1178	28/11808	0.3038	0.673843
4	Mucin type O-glycan biosynthesis	map00512	KEGG PATHWAY	4/1178	28/11808	0.3038	0.673843
14	Phospholipase D signaling pathway	map04072	KEGG PATHWAY	14/1178	120/11808	0.308889	0.674979
12	Th17 cell differentiation	map04659	KEGG PATHWAY	12/1178	99/11808	0.281765	0.675779
12	Leukocyte transendothelial migration	map04670	KEGG PATHWAY	12/1178	99/11808	0.281765	0.675779
9	Ribosome biogenesis in eukaryotes	map03008	KEGG PATHWAY	9/1178	72/11808	0.288648	0.675802
9	Salmonella infection	map05132	KEGG PATHWAY	9/1178	72/11808	0.288648	0.675802
8	Thyroid hormone synthesis	map04918	KEGG PATHWAY	8/1178	62/11808	0.275188	0.676503
10	IL-17 signaling pathway	map04657	KEGG PATHWAY	10/1178	81/11808	0.28666	0.676519
10	Estrogen signaling pathway	map04915	KEGG PATHWAY	10/1178	80/11808	0.273617	0.678295
11	Hematopoietic cell lineage	map04640	KEGG PATHWAY	11/1178	89/11808	0.272017	0.680043
17	Protein processing in endoplasmic reticulum	map04141	KEGG PATHWAY	17/1178	144/11808	0.267471	0.680206
1	D-Glutamine and D-glutamate metabolism	map00471	KEGG PATHWAY	1/1178	3/11808	0.270444	0.681889
9	Bile secretion	map04976	KEGG PATHWAY	9/1178	69/11808	0.247571	0.682555
7	Glycerolipid metabolism	map00561	KEGG PATHWAY	7/1178	51/11808	0.242985	0.682673
7	Ovarian steroidogenesis	map04913	KEGG PATHWAY	7/1178	51/11808	0.242985	0.682673
4	Fatty acid elongation	map00062	KEGG PATHWAY	4/1178	27/11808	0.28052	0.683913
4	Circadian rhythm	map04710	KEGG PATHWAY	4/1178	27/11808	0.28052	0.683913
16	Hepatitis B	map05161	KEGG PATHWAY	16/1178	133/11808	0.250989	0.685573
3	Other types of O-glycan biosynthesis	map00514	KEGG PATHWAY	3/1178	18/11808	0.264944	0.685602
3	Arginine biosynthesis	map00220	KEGG PATHWAY	3/1178	18/11808	0.264944	0.685602
2	Ubiquinone and other terpenoid-quinone biosynthesis	map00130	KEGG PATHWAY	2/1178	10/11808	0.262966	0.686503
10	Th1 and Th2 cell differentiation	map04658	KEGG PATHWAY	10/1178	79/11808	0.260761	0.686826
4	Glycosphingolipid biosynthesis - lacto and neolacto series	map00601	KEGG PATHWAY	4/1178	26/11808	0.257537	0.690666
8	EGFR tyrosine kinase inhibitor resistance	map01521	KEGG PATHWAY	8/1178	61/11808	0.26048	0.692267
13	Platelet activation	map04611	KEGG PATHWAY	13/1178	106/11808	0.256964	0.695453
14	Apoptosis	map04210	KEGG PATHWAY	14/1178	124/11808	0.3539	0.696003
7	Adherens junction	map04520	KEGG PATHWAY	7/1178	56/11808	0.323752	0.697131
3	Histidine metabolism	map00340	KEGG PATHWAY	3/1178	20/11808	0.321696	0.697796
7	B cell receptor signaling pathway	map04662	KEGG PATHWAY	7/1178	58/11808	0.357279	0.697996
3	Glycosylphosphatidylinositol (GPI)-anchor biosynthesis	map00563	KEGG PATHWAY	3/1178	21/11808	0.35017	0.702722
3	Vitamin digestion and absorption	map04977	KEGG PATHWAY	3/1178	21/11808	0.35017	0.702722
3	Mannose type O-glycan biosynthesis	map00515	KEGG PATHWAY	3/1178	21/11808	0.35017	0.702722
5	Hedgehog signaling pathway	map04340	KEGG PATHWAY	5/1178	39/11808	0.348424	0.704008
6	Type I diabetes mellitus	map04940	KEGG PATHWAY	6/1178	49/11808	0.36316	0.704817
13	Lysosome	map04142	KEGG PATHWAY	13/1178	114/11808	0.348393	0.7088
17	Systemic lupus erythematosus	map05322	KEGG PATHWAY	17/1178	152/11808	0.346618	0.710085
9	Endocrine resistance	map01522	KEGG PATHWAY	9/1178	78/11808	0.375057	0.713817
2	Glycosphingolipid biosynthesis - ganglio series	map00604	KEGG PATHWAY	2/1178	13/11808	0.377535	0.713928
2	Glycosaminoglycan biosynthesis - keratan sulfate	map00533	KEGG PATHWAY	2/1178	13/11808	0.377535	0.713928
18	Tuberculosis	map05152	KEGG PATHWAY	18/1178	164/11808	0.370825	0.714988
6	Glutathione metabolism	map00480	KEGG PATHWAY	6/1178	48/11808	0.344728	0.71616
6	Malaria	map05144	KEGG PATHWAY	6/1178	48/11808	0.344728	0.71616
4	beta-Alanine metabolism	map00410	KEGG PATHWAY	4/1178	31/11808	0.374432	0.717256
7	Chronic myeloid leukemia	map05220	KEGG PATHWAY	7/1178	57/11808	0.340463	0.722566
1	Neomycin, kanamycin and gentamicin biosynthesis	map00524	KEGG PATHWAY	1/1178	4/11808	0.343245	0.723267
1	Valine, leucine and isoleucine biosynthesis	map00290	KEGG PATHWAY	1/1178	4/11808	0.343245	0.723267
5	Mineral absorption	map04978	KEGG PATHWAY	5/1178	41/11808	0.389566	0.727354
10	Glycerophospholipid metabolism	map00564	KEGG PATHWAY	10/1178	85/11808	0.340339	0.727535
8	Platinum drug resistance	map01524	KEGG PATHWAY	8/1178	70/11808	0.398487	0.739332
19	Epstein-Barr virus infection	map05169	KEGG PATHWAY	19/1178	177/11808	0.403643	0.744217
4	Alanine, aspartate and glutamate metabolism	map00250	KEGG PATHWAY	4/1178	33/11808	0.421291	0.77193
3	Collecting duct acid secretion	map04966	KEGG PATHWAY	3/1178	24/11808	0.434233	0.78109
25	MicroRNAs in cancer	map05206	KEGG PATHWAY	25/1178	239/11808	0.432298	0.78238
5	Allograft rejection	map05330	KEGG PATHWAY	5/1178	43/11808	0.430517	0.783965
11	Neurotrophin signaling pathway	map04722	KEGG PATHWAY	11/1178	102/11808	0.44006	0.786773
8	Prolactin signaling pathway	map04917	KEGG PATHWAY	8/1178	73/11808	0.445545	0.787041
4	Aldosterone-regulated sodium reabsorption	map04960	KEGG PATHWAY	4/1178	34/11808	0.444417	0.789777
10	Pyrimidine metabolism	map00240	KEGG PATHWAY	10/1178	93/11808	0.451108	0.792124
8	Arachidonic acid metabolism	map00590	KEGG PATHWAY	8/1178	74/11808	0.461131	0.800197
7	Aldosterone synthesis and secretion	map04925	KEGG PATHWAY	7/1178	64/11808	0.458548	0.800424
18	Rap1 signaling pathway	map04015	KEGG PATHWAY	18/1178	174/11808	0.472438	0.810287
5	N-Glycan biosynthesis	map00510	KEGG PATHWAY	5/1178	45/11808	0.470869	0.812318
10	Toll-like receptor signaling pathway	map04620	KEGG PATHWAY	10/1178	96/11808	0.492373	0.830001
6	Synaptic vesicle cycle	map04721	KEGG PATHWAY	6/1178	56/11808	0.491318	0.837797
6	Fc epsilon RI signaling pathway	map04664	KEGG PATHWAY	6/1178	56/11808	0.491318	0.837797
7	Fc gamma R-mediated phagocytosis	map04666	KEGG PATHWAY	7/1178	67/11808	0.50809	0.842059
7	Bacterial invasion of epithelial cells	map05100	KEGG PATHWAY	7/1178	67/11808	0.50809	0.842059
14	cGMP-PKG signaling pathway	map04022	KEGG PATHWAY	14/1178	137/11808	0.504108	0.844953
8	Peroxisome	map04146	KEGG PATHWAY	8/1178	77/11808	0.507274	0.845457
2	Pantothenate and CoA biosynthesis	map00770	KEGG PATHWAY	2/1178	17/11808	0.517027	0.847351
7	Prostate cancer	map05215	KEGG PATHWAY	7/1178	68/11808	0.524269	0.854471
13	Cell adhesion molecules (CAMs)	map04514	KEGG PATHWAY	13/1178	131/11808	0.551272	0.874328
4	Tryptophan metabolism	map00380	KEGG PATHWAY	4/1178	39/11808	0.554603	0.874908
12	Oxytocin signaling pathway	map04921	KEGG PATHWAY	12/1178	120/11808	0.541578	0.877833
2	Glycosaminoglycan biosynthesis - chondroitin sulfate / dermatan sulfate	map00532	KEGG PATHWAY	2/1178	18/11808	0.548538	0.879449
2	Glycosaminoglycan degradation	map00531	KEGG PATHWAY	2/1178	18/11808	0.548538	0.879449
5	Glioma	map05214	KEGG PATHWAY	5/1178	49/11808	0.548424	0.884072
3	Galactose metabolism	map00052	KEGG PATHWAY	3/1178	29/11808	0.563597	0.884368
8	RIG-I-like receptor signaling pathway	map04622	KEGG PATHWAY	8/1178	81/11808	0.566655	0.884461
14	Non-alcoholic fatty liver disease (NAFLD)	map04932	KEGG PATHWAY	14/1178	143/11808	0.571218	0.886891
3	Citrate cycle (TCA cycle)	map00020	KEGG PATHWAY	3/1178	30/11808	0.587236	0.906988
3	DNA replication	map03030	KEGG PATHWAY	3/1178	30/11808	0.587236	0.906988
1	Synthesis and degradation of ketone bodies	map00072	KEGG PATHWAY	1/1178	9/11808	0.611791	0.916134
21	Endocytosis	map04144	KEGG PATHWAY	21/1178	219/11808	0.610195	0.918405
9	Inflammatory mediator regulation of TRP channels	map04750	KEGG PATHWAY	9/1178	94/11808	0.602812	0.921397
3	Apoptosis - multiple species	map04215	KEGG PATHWAY	3/1178	31/11808	0.610037	0.922876
2	Hippo signaling pathway - multiple species	map04392	KEGG PATHWAY	2/1178	20/11808	0.607116	0.923192
5	Metabolism of xenobiotics by cytochrome P450	map00980	KEGG PATHWAY	5/1178	53/11808	0.620078	0.923854
4	Cocaine addiction	map05030	KEGG PATHWAY	4/1178	43/11808	0.633693	0.939394
5	Melanoma	map05218	KEGG PATHWAY	5/1178	54/11808	0.636899	0.939425
5	Autoimmune thyroid disease	map05320	KEGG PATHWAY	5/1178	54/11808	0.636899	0.939425
3	SNARE interactions in vesicular transport	map04130	KEGG PATHWAY	3/1178	33/11808	0.653047	0.944357
3	Bladder cancer	map05219	KEGG PATHWAY	3/1178	33/11808	0.653047	0.944357
4	Sphingolipid metabolism	map00600	KEGG PATHWAY	4/1178	44/11808	0.651983	0.947463
8	Glucagon signaling pathway	map04922	KEGG PATHWAY	8/1178	87/11808	0.64914	0.948001
22	Cytokine-cytokine receptor interaction	map04060	KEGG PATHWAY	22/1178	236/11808	0.664779	0.951989
4	Amino sugar and nucleotide sugar metabolism	map00520	KEGG PATHWAY	4/1178	45/11808	0.669653	0.954336
4	Acute myeloid leukemia	map05221	KEGG PATHWAY	4/1178	46/11808	0.686695	0.964643
1	Taurine and hypotaurine metabolism	map00430	KEGG PATHWAY	1/1178	11/11808	0.685441	0.967489
14	Calcium signaling pathway	map04020	KEGG PATHWAY	14/1178	154/11808	0.683441	0.969303
6	Progesterone-mediated oocyte maturation	map04914	KEGG PATHWAY	6/1178	70/11808	0.711319	0.971478
3	Carbohydrate digestion and absorption	map04973	KEGG PATHWAY	3/1178	36/11808	0.710985	0.975537
8	Glutamatergic synapse	map04724	KEGG PATHWAY	8/1178	91/11808	0.698754	0.976931
2	Phototransduction	map04744	KEGG PATHWAY	2/1178	24/11808	0.706531	0.978529
2	alpha-Linolenic acid metabolism	map00592	KEGG PATHWAY	2/1178	24/11808	0.706531	0.978529
18	Ras signaling pathway	map04014	KEGG PATHWAY	18/1178	199/11808	0.705296	0.981426
2	Butanoate metabolism	map00650	KEGG PATHWAY	2/1178	26/11808	0.747833	0.989286
2	Maturity onset diabetes of the young	map04950	KEGG PATHWAY	2/1178	25/11808	0.727846	0.989468
2	Renin-angiotensin system	map04614	KEGG PATHWAY	2/1178	25/11808	0.727846	0.989468
15	Regulation of actin cytoskeleton	map04810	KEGG PATHWAY	15/1178	172/11808	0.746474	0.991937
3	Basal transcription factors	map03022	KEGG PATHWAY	3/1178	39/11808	0.761171	0.993564
15	cAMP signaling pathway	map04024	KEGG PATHWAY	15/1178	171/11808	0.738448	0.994713
16	Alcoholism	map05034	KEGG PATHWAY	16/1178	184/11808	0.755524	0.994999
7	Melanogenesis	map04916	KEGG PATHWAY	7/1178	84/11808	0.745548	0.995188
6	Insulin secretion	map04911	KEGG PATHWAY	6/1178	77/11808	0.793125	0.995624
2	Primary immunodeficiency	map05340	KEGG PATHWAY	2/1178	27/11808	0.766545	0.996171
3	Endometrial cancer	map05213	KEGG PATHWAY	3/1178	41/11808	0.790533	0.996612
10	Hepatitis C	map05160	KEGG PATHWAY	10/1178	119/11808	0.761146	0.997947
1	Non-homologous end-joining	map03450	KEGG PATHWAY	1/1178	13/11808	0.745128	0.999149
4	Amphetamine addiction	map05031	KEGG PATHWAY	4/1178	52/11808	0.775788	1
8	Chagas disease (American trypanosomiasis)	map05142	KEGG PATHWAY	8/1178	99/11808	0.783645	1
2	Base excision repair	map03410	KEGG PATHWAY	2/1178	28/11808	0.784037	1
7	T cell receptor signaling pathway	map04660	KEGG PATHWAY	7/1178	88/11808	0.787585	1
4	Drug metabolism - cytochrome P450	map00982	KEGG PATHWAY	4/1178	53/11808	0.788499	1
4	Colorectal cancer	map05210	KEGG PATHWAY	4/1178	53/11808	0.788499	1
2	Prion diseases	map05020	KEGG PATHWAY	2/1178	29/11808	0.800366	1
4	Lysine degradation	map00310	KEGG PATHWAY	4/1178	55/11808	0.812186	1
1	Nitrogen metabolism	map00910	KEGG PATHWAY	1/1178	16/11808	0.814125	1
2	Autophagy - other	map04136	KEGG PATHWAY	2/1178	30/11808	0.81559	1
4	Arrhythmogenic right ventricular cardiomyopathy (ARVC)	map05412	KEGG PATHWAY	4/1178	56/11808	0.823191	1
13	Jak-STAT signaling pathway	map04630	KEGG PATHWAY	13/1178	161/11808	0.826524	1
12	Tight junction	map04530	KEGG PATHWAY	12/1178	150/11808	0.828381	1
2	Tyrosine metabolism	map00350	KEGG PATHWAY	2/1178	31/11808	0.829766	1
7	Natural killer cell mediated cytotoxicity	map04650	KEGG PATHWAY	7/1178	93/11808	0.832526	1
12	Chemokine signaling pathway	map04062	KEGG PATHWAY	12/1178	151/11808	0.834932	1
3	Amyotrophic lateral sclerosis (ALS)	map05014	KEGG PATHWAY	3/1178	45/11808	0.840264	1
2	Linoleic acid metabolism	map00591	KEGG PATHWAY	2/1178	32/11808	0.842952	1
4	Renin secretion	map04924	KEGG PATHWAY	4/1178	58/11808	0.8436	1
1	Phenylalanine metabolism	map00360	KEGG PATHWAY	1/1178	18/11808	0.849409	1
3	Non-small cell lung cancer	map05223	KEGG PATHWAY	3/1178	46/11808	0.850978	1
3	Valine, leucine and isoleucine degradation	map00280	KEGG PATHWAY	3/1178	46/11808	0.850978	1
8	Sphingolipid signaling pathway	map04071	KEGG PATHWAY	8/1178	108/11808	0.856482	1
5	GABAergic synapse	map04727	KEGG PATHWAY	5/1178	72/11808	0.857674	1
7	Cholinergic synapse	map04725	KEGG PATHWAY	7/1178	97/11808	0.86277	1
1	Mismatch repair	map03430	KEGG PATHWAY	1/1178	19/11808	0.864455	1
2	Homologous recombination	map03440	KEGG PATHWAY	2/1178	35/11808	0.877124	1
1	Glycosaminoglycan biosynthesis - heparan sulfate / heparin	map00534	KEGG PATHWAY	1/1178	20/11808	0.877999	1
9	Ubiquitin mediated proteolysis	map04120	KEGG PATHWAY	9/1178	124/11808	0.882044	1
4	Taste transduction	map04742	KEGG PATHWAY	4/1178	63/11808	0.886088	1
3	Long-term potentiation	map04720	KEGG PATHWAY	3/1178	51/11808	0.895627	1
3	Pancreatic cancer	map05212	KEGG PATHWAY	3/1178	51/11808	0.895627	1
2	Fat digestion and absorption	map04975	KEGG PATHWAY	2/1178	37/11808	0.895945	1
4	Hypertrophic cardiomyopathy (HCM)	map05410	KEGG PATHWAY	4/1178	66/11808	0.906431	1
8	Spliceosome	map03040	KEGG PATHWAY	8/1178	121/11808	0.925495	1
6	Oocyte meiosis	map04114	KEGG PATHWAY	6/1178	97/11808	0.930929	1
2	Nucleotide excision repair	map03420	KEGG PATHWAY	2/1178	42/11808	0.931886	1
4	RNA degradation	map03018	KEGG PATHWAY	4/1178	71/11808	0.933248	1
2	Fanconi anemia pathway	map03460	KEGG PATHWAY	2/1178	43/11808	0.937498	1
2	Proteasome	map03050	KEGG PATHWAY	2/1178	45/11808	0.947433	1
4	GnRH signaling pathway	map04912	KEGG PATHWAY	4/1178	75/11808	0.949461	1
4	Morphine addiction	map05032	KEGG PATHWAY	4/1178	79/11808	0.961985	1
11	Huntington disease	map05016	KEGG PATHWAY	11/1178	172/11808	0.96307	1
9	RNA transport	map03013	KEGG PATHWAY	9/1178	148/11808	0.965792	1
3	Gastric acid secretion	map04971	KEGG PATHWAY	3/1178	66/11808	0.966668	1
3	Dilated cardiomyopathy (DCM)	map05414	KEGG PATHWAY	3/1178	68/11808	0.971566	1
5	Vascular smooth muscle contraction	map04270	KEGG PATHWAY	5/1178	100/11808	0.976311	1
2	Cytosolic DNA-sensing pathway	map04623	KEGG PATHWAY	2/1178	59/11808	0.984885	1
1	Ether lipid metabolism	map00565	KEGG PATHWAY	1/1178	41/11808	0.986656	1
1	Vasopressin-regulated water reabsorption	map04962	KEGG PATHWAY	1/1178	44/11808	0.990276	1
1	Long-term depression	map04730	KEGG PATHWAY	1/1178	45/11808	0.99125	1
2	Cardiac muscle contraction	map04260	KEGG PATHWAY	2/1178	65/11808	0.991271	1
4	Serotonergic synapse	map04726	KEGG PATHWAY	4/1178	99/11808	0.991563	1
6	Oxidative phosphorylation	map00190	KEGG PATHWAY	6/1178	131/11808	0.992525	1
5	Adrenergic signaling in cardiomyocytes	map04261	KEGG PATHWAY	5/1178	118/11808	0.993534	1
7	Alzheimer disease	map05010	KEGG PATHWAY	7/1178	157/11808	0.996602	1
2	Circadian entrainment	map04713	KEGG PATHWAY	2/1178	77/11808	0.997146	1
3	Dopaminergic synapse	map04728	KEGG PATHWAY	3/1178	112/11808	0.999334	1
12	Neuroactive ligand-receptor interaction	map04080	KEGG PATHWAY	12/1178	260/11808	0.999552	1
1	Salivary secretion	map04970	KEGG PATHWAY	1/1178	77/11808	0.999702	1
1	mRNA surveillance pathway	map03015	KEGG PATHWAY	1/1178	78/11808	0.999732	1
4	Parkinson disease	map05012	KEGG PATHWAY	4/1178	141/11808	0.999737	1
1	Pancreatic secretion	map04972	KEGG PATHWAY	1/1178	84/11808	0.999858	1
2	Retrograde endocannabinoid signaling	map04723	KEGG PATHWAY	2/1178	129/11808	0.999981	1
2	Ribosome	map03010	KEGG PATHWAY	2/1178	138/11808	0.999992	1
5	Olfactory transduction	map04740	KEGG PATHWAY	5/1178	880/11808	1	1
